# Supplementary material for: Niche‐neutral theoretic approach to mechanisms underlying the biodiversity and biogeography of human microbiomes
Source: PubMed Central journal article supplement (PMC7896709; doi:10.1111/eva.13116), 2020-10-13
Supplement: EVA-14-322-s001.pdf [file EVA-14-322-s001.pdf]

**Online Supplementary Information (I) (OSI-1)** for: Ma ZS (2020) Niche-neutral theoretic approach to the mechanisms underlying the biodiversity and biogeography of human microbiomes. *Evolutionary Applications*.

## **Table of Contents**

Sections I-III are included in OSI-1 (this document), and Section IV in a separate OSI-2.

**Section I.** List of All Supplementary Tables

**Section II. Tables S1 & S2:** the two tables illustrate the fittings of MSN/NNH models with 24 selected metacommunities. The detailed fitting results for all 5420 samples representing 699 metacommunities and 5420 local communities were displayed in **Tables S3-S14**, which were provided in a separate file (OSI-2).

This section also includes detailed interpretations of the fitting results of the 24 selected metacommunities, which were generated from 4 possible fitting outcomes (MSN only, NNH only, both MSN & NNH, and neither MSN nor NNH) of 6 datasets (4x6=24).

**Section III. Table S15-S20**, exhibiting the results of Logistic Regression and Cox Regression modeling of the relationships among neutrality, niche differentiations, and metrics of community/species characteristics.

**Section IV. Table S3-S14** (*included* in OSI-2), exhibiting the detailed fitting results of MSN/NNH models to all the datasets analyzed in this study.

## Section I. List of Supplementary Tables

### Selected test results for the MSN model (OSI-1, this document)

**Table S1.** The selected test results of fitting Harris *et al's* (2015) HDP-MSN (hierarchical Dirichlet process, multi-site neutral) model to the six human microbiome datasets (including 699 meta-communities and 5420 local communities), excerpted from Tables S3-S8 in the OSI (\*the column legends and their interpretations in the neutrality tests are noted below)

### Selected test results for the NNH model (OSI-1, this document)

**Table S2.** The selected test results of fitting Tang & Zhou's (2013) NNH (niche-neutral hybrid) model to the six human microbiome datasets (including 699 meta-communities and 5420 local communities), excerpted from Tables S9-S14 in the OSI (the column legends are noted as\*)

### Detailed test results for the MSN model (Displayed in OSI-2)

**Table S3.** Test results of fitting MSN (multi-site neutral) model to HMP-oral datasets ( $Sites \geq 2$ ,  $Subjects = 146$ )

**Table S4.** Test results of fitting MSN (multi-site neutral) model to HMP-skin datasets ( $Sites \geq 2$ ,  $Subjects = 159$ )

**Table S5.** Test results of fitting MSN (multi-site neutral) model to HMP-vaginal datasets ( $Sites \geq 2$ ,  $Subjects = 72$ )

**Table S6.** Test results of fitting MSN (multi-site neutral) model to HMP-whole datasets ( $Sites \geq 5$ ,  $Subjects = 172$ )

**Table S7.** Test results of fitting MSN (multi-site neutral) model to Gut datasets ( $Sites = 7$ ,  $Subjects = 11$ )

**Table S8.** Test results of fitting MSN (multi-site neutral) model to Lung datasets ( $Sites = 4$ ,  $Subjects = 139$ )

### Detailed test results for the NNH model (Displayed in OSI-2)

**Table S9.** Test results of fitting NNH (multi-site neutral) model to HMP-oral datasets ( $Sites \geq 2$ ,  $Subjects = 146$ )

**Table S10.** Test results of fitting NNH (multi-site neutral) model to HMP-skin datasets ( $Sites \geq 2$ ,  $Subjects = 159$ )

**Table S11.** Test results of fitting NNH (multi-site neutral) model to HMP-vaginal datasets ( $Sites \geq 2$ ,  $Subjects = 72$ )

**Table S12.** Test results of fitting NNH (multi-site neutral) model to HMP-whole datasets ( $Sites \geq 5$ ,  $Subjects = 172$ )

**Table S13.** Test results of fitting NNH (multi-site neutral) model to Gut datasets ( $Sites = 7$ ,  $Subjects = 11$ )

**Table S14.** Test results of fitting NNH (multi-site neutral) model to Lung datasets ( $Sites = 4$ ,  $Subjects = 139$ )

### The factors influencing MSN/NNH model fittings (OSI-1, this document)

**Table S15.** Logistic regression analysis of the major factors influencing the neutrality (judged by passing the MSN model-fitting test) of the human microbiome at meta-community level

**Table S16.** Logistic regression analysis of major factors influencing the neutrality (judged by passing the MSN model-fitting test) of the human microbiome at local community level

**Table S17.** The classification table associated with the logistic regression (LR) analysis for the MSN model at the meta-community level and local community level, respectively

**Table S18.** Logistic regression analysis of major factors influencing the niche-neutral hybrid (NNH) performance (success) of the human microbiome at meta-community level

**Table S19.** The classification table associated with the logistic regression (LR) analysis for the NNH model at local community level (*i.e.*, the LR model in Table 20).

**Table S20.** Cox regression analysis of major factors influencing the niche-neutral hybrid (NNH) performance (success) of the human microbiome at local community level

## Section II. Tables S1-S2 and their interpretations

Tables S1 & S2 (below) selected the test results for maximally 24 selected metacommunity samples, excerpted from Tables S3-S8 (for MSN modeling) and Tables S9-S14 (for NNH modeling) in the OSI-2. Although both MSN and NNH tests were performed independently, the cases in the summary tables (Tables S1 & S2) were carefully selected to be representative of various combinations of the test results, *i.e.*, passing MSN only, passing NNH only, passing both MSN and NNH and passing neither, 4 possibilities for each of the six human microbiome datasets (a total of  $4 \times 6 = 24$  cases or meta-communities). Therefore, Tables S1 and S2 offer windows to inspect the parameters and conclusions of testing the MSN/NNH models. To inspect the complete test results of the 699 meta-community samples, readers are referred to Tables S3-S14 in the OSI-2.

### MSN (multisite neutral) modeling

With Harris *et al* (2017) multisite HDP-UNTB model (*i.e.*, MSN model), two-level tests (local community and meta-community levels) for the neutrality were performed. For both the tests, samples were generated from  $N=2500$  sets of fitted parameters, which were selected from every tenth iteration of the last 25,000 Gibbs samples (a total of 50,000 samples were simulated and the first 25,000 samples were discarded as burn-in).  $N=2500$  is chosen to compute the pseudo  $p$ -values for conducting the neutrality test. In addition, for each observed community sample, there is the *actual log-likelihood*  $L_0$ . Two additional parameters  $\theta$  and  $M$  are particularly worthy of mentioning:  $\theta$  is the median of the fundamental biodiversity parameters computed from 25,000 times of simulations, and  $M$ -value is the average of the medians of the migration rates of local communities in each meta-community, also computed from 25,000 times of simulations (note  $M$  is the average of medians per local community).

To test the neutrality at the meta-community level, assume  $L_M$  is the median of the log-likelihoods of the simulated neutral meta-community samples, and  $N_M$  is the number of simulated neutral meta-community samples, having their likelihoods satisfying  $L \leq L_0$  (*i.e.*, the simulated likelihood not to exceed the actual likelihood) then the  $P_M = N_M / N$  is the pseudo  $p$ -value for testing the neutrality at meta-community level. If  $P_M > 0.05$ , the meta-community satisfies the MSN model.

To test the neutrality at the local community level, assume  $L_L$  is the median of the log-likelihoods of the simulated local community samples, and  $N_L$  is the number of simulated local community samples, having their likelihoods not exceeding the  $L_0$ , then  $P_L=N_L/N$ , is the pseudo  $p$ -value for testing the neutrality at the local community level. If  $P_L>0.05$ , the local community satisfies the neutral model. For detailed computational procedures and code to implement the MSN modeling, readers are referred to the original method paper by Harris et al (2017).

The full fitting results for the MSN model with 6 datasets are included in Table S3-S8 of the OSI-2 and following Table S1 (below, for selected samples from Table S3-S8).

### **NNH (niche-neutral hybrid) modeling**

With Tang & Zhou (2013) NNH model, we computed and tabulated the fitting results in Table S9-S14 of the OSI-2 and Table S2 (below: for selected samples from Table S9-S14). The results include: the average number of individuals per niche (local community) in each metacommunity ( $J$ ), the average species numbers per niche (local community) in each metacommunity ( $S$ ), the average fundamental biodiversity parameter per niche (local community) in each metacommunity ( $\theta$ ), the average of the migration coefficients ( $m$ ), the average of the birth to death ratio ( $x$ ), the average of the migration rate ( $\gamma$ ). The last two columns in those Tables (S9-S14, Table S2) are the number and percentage of local communities (niches) that passed the local neutrality test.

The NNH model incorporated niche differentiations into Volkov *et al.* (2007) multi-site neutral model. Specifically, the per capita birth to death rates ( $x$ ) and immigration parameter ( $\gamma$ ) vary among species from different niches. In the case of our multi-site microbiome datasets, we treat each site as a niche occupied by a local microbial community and fit the neutral model for each local community. By first computing the number of species with abundance  $n$  in each local community, and then computing total expected number of species with abundance  $n$  in the metacommunity, one can obtain the theoretically expected number of species with each abundance level ( $n=1, 2, \dots$ ). After obtaining the theoretically predicted and observed species abundance distributions, the Chi-squared test is performed by comparing with the corresponding observed number of species for each corresponding abundance level ( $n$ ). The  $p$ -value of Chi-squared test is then utilized to determine whether or not Tang & Zhou's (2013) hybrid model is suitable for a set of microbial communities sampled from the multiple microbiome sites of a

human individual. Specifically, at the metacommunity level, if  $p\text{-value} > 0.05$ , then the meta-community satisfies the NNH and the metacommunity assembly is co-driven by both niche and neutral processes, which also implies that the meta-community itself does not satisfy the neutral theory, but within each niche, the local community is neutral. If  $p\text{-value} < 0.05$ , the metacommunity does not satisfy the NNH, which also implies that within each niche, the local community is not neutral either, and the metacommunity assembly is solely influenced by the niche process. For detailed computational procedures and code to implement the NNH modeling, readers are referred to the original method paper by Tang & Zhou (2013).

## References

Harris K, Parsons TL, Ijaz UZ, *et al.* (2017). Linking Statistical and Ecological Theory: Hubbell's Unified Neutral Theory of Biodiversity as a Hierarchical Dirichlet Process. *Proceedings of the IEEE*, 105(3):516-529.

Tang J, Zhou S. (2013). Hybrid niche-neutral models outperform an otherwise equivalent neutral model for fitting coral reef data. *Journal of Theoretical Biology*, 317(1):212-218.

Volkov I, Banavar JR, Hubbell SP, Maritan A. (2007). Patterns of relative species abundance in rainforests and coral reefs. *Nature* **450**:45–49.

**Table S1.** The selected test results of fitting Harris *et al's* (2017) HDP-MSN (hierarchical Dirichlet process, multi-site neutral) model to the six human microbiome datasets (including 699 meta-communities and 5420 local communities), excerpted from Tables S3-S8 in the OSI-2 (\*the column legends and their interpretations in the neutrality tests are noted below)

| Datasets      | ID        | $L_0$      | $\theta$ | $M$ -value | Metacommunity |         |      |         | Local Community |         |      |         |
|---------------|-----------|------------|----------|------------|---------------|---------|------|---------|-----------------|---------|------|---------|
|               |           |            |          |            | $L_M$         | $\#N_M$ | $N$  | $**P_M$ | $L_L$           | $\#N_L$ | $N$  | $**P_L$ |
| HMP (Oral)    | 160866180 | -39276.994 | 2479.616 | 404.759    | -39658.654    | 416     | 2500 | 0.834   | -39656.731      | 286     | 2500 | 0.886   |
|               | 246515023 | -15522.687 | 2123.168 | 688.241    | -14123.284    | 2500    | 2500 | 0.000   | -14699.120      | 2500    | 2500 | 0.000   |
|               | 178713055 | -30835.242 | 2294.473 | 478.897    | -31605.086    | 57      | 2500 | 0.977   | -31801.049      | 0       | 2500 | 1.000   |
|               | 256789458 | -14889.466 | 2752.214 | 416.655    | -14070.258    | 2499    | 2500 | 0.000   | -14623.931      | 2220    | 2500 | 0.112   |
| HMP (Skin)    | 132902142 | -3150.748  | 536.140  | 138.368    | -3216.947     | 716     | 2500 | 0.714   | -3202.208       | 1083    | 2500 | 0.567   |
|               | 160987560 | -11503.150 | 1707.760 | 1629.485   | -10680.152    | 2500    | 2500 | 0.000   | -10852.340      | 2500    | 2500 | 0.000   |
|               | 160967330 | -10304.762 | 1002.092 | 2859.186   | -10212.743    | 1697    | 2500 | 0.321   | -9851.933       | 2499    | 2500 | 0.000   |
|               | 875002022 | -2877.205  | 817.475  | 169.219    | -2594.960     | 2496    | 2500 | 0.002   | -2730.332       | 2348    | 2500 | 0.061   |
| HMP (Vaginal) | 246515023 | -1693.488  | 69.721   | 1661.087   | -1853.194     | 226     | 2500 | 0.910   | -1733.806       | 473     | 2500 | 0.811   |
|               | 256789458 | -2049.638  | 1544.165 | 45.299     | -1855.302     | 2383    | 2498 | 0.046   | -1921.186       | 2171    | 2498 | 0.131   |
|               | 158114885 | -1340.522  | 42.919   | 306.473    | -1661.194     | 22      | 2500 | 0.991   | -1425.677       | 107     | 2500 | 0.957   |
| HMP (Total)   | 132902142 | -38065.916 | 3559.293 | 370.025    | -38355.535    | 600     | 2500 | 0.760   | -38935.805      | 25      | 2500 | 0.990   |
|               | 161351702 | -8731.369  | 3850.748 | 443.719    | -7173.746     | 2500    | 2500 | 0.000   | -7672.465       | 2500    | 2500 | 0.000   |
|               | 765398164 | -4687.293  | 728.674  | 234.497    | -4682.253     | 1287    | 2500 | 0.485   | -4769.107       | 639     | 2500 | 0.744   |
|               | 184349034 | -36519.128 | 7099.860 | 319.325    | -34765.011    | 2500    | 2500 | 0.000   | -36136.941      | 2090    | 2500 | 0.164   |
| Gut           | S407      | -6527.371  | 225.626  | 1610.896   | -6902.900     | 140     | 2500 | 0.944   | -6500.625       | 1511    | 2500 | 0.396   |
|               | S400      | -16579.634 | 793.343  | 471.258    | -17899.558    | 0       | 2500 | 1.000   | -16962.178      | 100     | 2500 | 0.960   |
| Lung          | A3        | -831.167   | 32.854   | 59.980     | -985.861      | 139     | 2500 | 0.944   | -857.579        | 795     | 2500 | 0.682   |
|               | A1        | -481.585   | 13.308   | 32.427     | -633.426      | 139     | 2500 | 0.944   | -500.514        | 791     | 2500 | 0.684   |

\* $N=2500$  is the number of Gibb samples selected from 25000 simulated communities (*i.e.*, every tenth iteration of the last 25,000 Gibbs samples), it is chosen to compute the pseudo  $p$ -value (as explained below) for conducting the neutrality test.  $L_0$  is the *actual log-likelihood*.  $\theta$  is the median of biodiversity parameters computed from 25,000 times of simulations.  $M$ -value is the average medians of the migration rates of local communities in each meta-community, also computed from 25,000 times of simulations.  $L_M$  is the median of the log-likelihoods of the simulated neutral meta-community samples; and  $N_M$  is the number of simulated neutral meta-community samples with their likelihoods not exceeding the actual likelihood satisfying  $L \leq L_0$  (where  $L$  and  $L_0$  are the simulated and actual likelihood respectively),  $P_M = N_M / N$  is the pseudo  $p$ -value for testing the neutrality at meta-community level; if  $P_M > 0.05$ , the meta-community satisfies the MSN model.  $L_L$  is the median of the log-likelihoods of the simulated local community samples, and  $N_L$  is the number of simulated local community samples with their likelihoods not exceeding the  $L_0$ , *i.e.*,  $L \leq L_0$  (where  $L$  and  $L_0$  are the simulated and actual likelihood respectively),  $P_L = N_L / N$ , is the pseudo  $p$ -value for testing the neutrality at the local community level; if  $P_L > 0.05$ , the local community satisfies the neutral model. See Fig 2 for an example of fitting the MSN model.

\*\*Due to the typo/error in Harris *et al.* (2017), the  $P_M$ -values exhibited here are adjusted as  $(P_M = 1 - P_{MS})$ , where  $P_{MS}$  is output from their computational program. Similarly, the  $P_L$ -values are adjusted as  $(P_L = 1 - P_{LS})$ , where  $P_{LS}$  is output from their computational program.

#The  $N_M$  and  $N_L$  reported here are from the output of Harris *et al.* (2017) software. When computing the  $P$ -value, their “complements”  $(2500 - N_M)$  or  $(2500 - N_L)$  should be used to circumvent their error.

**Table S2.** The selected test results of fitting Tang & Zhou’s (2013) NNH (niche-neutral hybrid) model to the six human microbiome datasets (including 699 meta-communities and 5420 local communities), excerpted from Tables S9-S14 in the OSI-2 (the column legends are noted as\*)

|                  | ID        | $J$      | $S$     | $\theta$ | $m$   | $x$   | $\gamma$ | $R^2$ | $\chi^2$ | $p$ -value | $N^{pass}$ | $\%^{(pass)}$ |
|------------------|-----------|----------|---------|----------|-------|-------|----------|-------|----------|------------|------------|---------------|
| HMP<br>(Oral)    | 160866180 | 1652.063 | 522.188 | 907.849  | 0.001 | 0.372 | 1.008    | 1.000 | 53.076   | 0.000      | 6          | 37.5          |
|                  | 246515023 | 700.222  | 402.667 | 1061.209 | 0.001 | 0.293 | 0.994    | 1.000 | 0.676    | 0.984      | 1          | 11.1          |
|                  | 178713055 | 6283.571 | 949.143 | 981.375  | 0.000 | 0.491 | 1.003    | 1.000 | 7.964    | 0.632      | 1          | 14.3          |
|                  | 256789458 | 3455.750 | 782.000 | 1053.043 | 0.000 | 0.418 | 1.019    | 0.999 | 57.079   | 0.000      | 3          | 75.0          |
|                  | 132902142 | 1694.000 | 246.333 | 430.888  | 0.002 | 0.317 | 1.082    | 0.997 | 341.272  | 0.000      | 3          | 100.0         |
| HMP<br>(Skin)    | 160987560 | 1794.500 | 804.500 | 1591.265 | 0.001 | 0.326 | 0.996    | 1.000 | 2.577    | 0.765      | 0          | 0.0           |
|                  | 160967330 | 2096.750 | 834.250 | 1313.915 | 0.001 | 0.392 | 0.993    | 1.000 | 4.466    | 0.614      | 0          | 0.0           |
|                  | 875002022 | 1474.000 | 317.500 | 492.451  | 0.001 | 0.378 | 1.058    | 0.987 | 64.998   | 0.000      | 2          | 100.0         |
| HMP<br>(Vaginal) | 246515023 | 2108.667 | 210.333 | 108.122  | 0.000 | 0.684 | 0.954    | 0.953 | 41.415   | 0.000      | 3          | 100.0         |
|                  | 256789458 | 5387.000 | 350.000 | 247.265  | 0.000 | 0.593 | 0.986    | 0.990 | 6.426    | 0.600      | 0          | 0.0           |
|                  | 158114885 | 3985.500 | 127.000 | 54.974   | 0.000 | 0.724 | 0.954    | 0.970 | 6.947    | 0.730      | 0          | 0.0           |
|                  | 132902142 | 4662.500 | 749.600 | 841.491  | 0.001 | 0.434 | 1.027    | 0.999 | 87.094   | 0.000      | 7          | 70.0          |
| HMP<br>(Total)   | 161351702 | 1445.000 | 587.667 | 939.129  | 0.001 | 0.399 | 0.988    | 1.000 | 7.266    | 0.297      | 0          | 0.0           |
|                  | 765398164 | 5593.500 | 526.000 | 456.615  | 0.000 | 0.539 | 1.008    | 0.999 | 9.215    | 0.418      | 0          | 0.0           |
|                  | 184349034 | 4416.250 | 793.625 | 1019.770 | 0.000 | 0.434 | 1.020    | 0.999 | 118.340  | 0.000      | 5          | 62.5          |
|                  | S407      | 1223.000 | 332.286 | 299.728  | 0.001 | 0.543 | 0.967    | 0.993 | 38.469   | 0.000      | 3          | 42.9          |
| Gut              | S400      | 3630.571 | 583.143 | 557.865  | 0.000 | 0.513 | 0.998    | 1.000 | 6.383    | 0.701      | 0          | 0.0           |
|                  | A3        | 1666     | 51.000  | 31.833   | 0.001 | 0.653 | 0.966    | 0.989 | 22.149   | 0.014      | 1          | 25.0          |
| Lung             | A1        | 1666     | 27.000  | 9.935    | 0.000 | 0.856 | 0.738    | 0.959 | 5.077    | 0.828      | 0          | 0.0           |

\* $J$ : the average number of individuals per niche (local community) in each metacommunity,  $S$ : the average species numbers per niche (local community) in each metacommunity,  $\theta$ : the average fundamental biodiversity parameter per niche (local community) in each metacommunity,  $m$ : the average of the migration coefficients,  $x$ : the average of the birth to death ratio,  $\gamma$ : the average of the migration rate,  $R^2$ : the goodness-of-fitting index,  $\chi^2$ -value: the  $\chi^2$ -value of chi-squared test for observed value against predicted value,  $p$ -value for the  $\chi^2$ -test; when  $p$ -value  $>$  0.05, the metacommunity satisfies the NNH model. The last two columns are the number and percentage of local communities (niches) that passed the local neutrality test. Note that  $R^2=1$  resulted from approximation with four effective digits only (e.g., 0.99995, exact 1 is nearly impossible to achieve). See Fig 3 for an example of fitting the NNH model.

### Section III. Supplementary Tables S15-S20

**Table S15.** Logistic regression (LR) analysis of the major factors influencing the neutrality (judged by passing the MSN model-fitting test) of the human microbiome at meta-community level#

| Variable (Factor)                             | LR Coefficient<br>(B or Beta) | Standard<br>Error | <i>p</i> -value of<br>Wald Test | Odds Ratio:<br>Exp (B) |
|-----------------------------------------------|-------------------------------|-------------------|---------------------------------|------------------------|
| Community Dominance                           | 0.02892                       | 0.00389           | *<0.0001                        | 1.02935                |
| Hill numbers ( <i>q</i> =0): Species Richness | 0.00380                       | 0.00051           | *<0.0001                        | 1.00381                |
| $\theta$ (Fundamental Biodiversity Number)    | -0.00131                      | 0.00017           | *<0.0001                        | 0.99869                |
| Species Dominance                             | -0.00717                      | 0.00139           | *<0.0001                        | 0.99285                |

#Reference Group  $PM=0$ , *i.e.*, not passing neutrality test at meta-community level.  $R^2=0.33$ ; \**p*-value=0.001

**Table S16.** Logistic regression (LR) analysis of major factors influencing the neutrality (judged by passing the MSN model-fitting test) of the human microbiome at local community level#

| Variable (Factor)                          | LR Coefficient<br>(B or Beta) | Standard<br>Error | <i>p</i> -value of<br>Wald Test | Odds Ratio:<br>Exp (B) |
|--------------------------------------------|-------------------------------|-------------------|---------------------------------|------------------------|
| Community Dominance                        | 0.08010                       | 0.00955           | *<0.0001                        | 1.08340                |
| Species Dominance                          | -0.02221                      | 0.00572           | *<0.0001                        | 0.97804                |
| Immigration Ratio (M-Value)                | -0.00097                      | 0.00022           | *<0.0001                        | 0.99903                |
| $\theta$ (Fundamental Biodiversity Number) | -0.00085                      | 0.00017           | *<0.0001                        | 0.99915                |

#Reference Group  $PL=0$ , *i.e.*, not passing neutrality test at local community level.  $R^2=0.53$ ; \**p*-value=0.001

**Table S17.** The classification table associated with the logistic regression (LR) analysis for the MSN model at the meta-community level and local community level, respectively

| Actual                                                                    | Estimated (for Meta-community)  |             |       |
|---------------------------------------------------------------------------|---------------------------------|-------------|-------|
|                                                                           | 0 (non-neutral)                 | 1 (neutral) | Total |
| 0 (non-neutral)                                                           | 33                              | 46          | 79    |
| 1 (neutral)                                                               | 5                               | 615         | 620   |
| Total                                                                     | 38                              | 661         | 699   |
| <b>Percentage Correctly classified = 91.6%; Area Under ROC Curve=0.89</b> |                                 |             |       |
| Actual                                                                    | Estimated (for Local-community) |             |       |
|                                                                           | 0 (non-neutral)                 | 1 (neutral) | Total |
| 0 (non-neutral)                                                           | 34                              | 20          | 54    |
| 1 (neutral)                                                               | 6                               | 639         | 645   |
| Total                                                                     | 40                              | 659         | 699   |
| <b>Percentage Correctly classified = 96.4%; Area Under ROC Curve=0.93</b> |                                 |             |       |



**Table S18.** Logistic regression analysis of major factors influencing the niche-neutral hybrid (NNH) performance (success) of the human microbiome at meta-community level#

| Variable (Factor)                        | LR Coefficient<br>(B or Beta) | Standard<br>Error | p-value of<br>Wald Test | Odds Ratio:<br>Exp (B) |
|------------------------------------------|-------------------------------|-------------------|-------------------------|------------------------|
| Community Dominance                      | -0.01614                      | 0.00367           | ***=0.0001              | 0.98399                |
| X=Ratio of Birth to Death ( <i>b/d</i> ) | 5.70576                       | 1.10415           | ***<0.0001              | 300.594                |
| Y= Migration of Each Niche               | -1.07973                      | 0.63226           | <i>p</i> =0.08769       | 0.33969                |
| Neutrality of Local Community (PL=1)     | 4.22352                       | 0.35051           | ***<0.0001              | 0.93220                |

#The model for *PM*=0, not passing NNH at the meta-community level.  $R^2=0.57$ ; \*\*\**p*-value=0.001

**Table S19.** The classification table associated with the logistic regression (LR) analysis for the NNH model at local community level (*i.e.*, the LR model in Table 20).

| Actual                                         | Estimated       |             |       |
|------------------------------------------------|-----------------|-------------|-------|
|                                                | 0 (non-neutral) | 1 (neutral) | Total |
| 0 (non-neutral)                                | 535             | 23          | 558   |
| 1 (neutral)                                    | 33              | 104         | 137   |
| Total                                          | 568             | 127         | 695   |
| <b>Percentage Correctly classified = 91.9%</b> |                 |             |       |
| <b>Area Under ROC Curve=0.937</b>              |                 |             |       |

**Table S20.** Cox regression analysis of major factors influencing the niche-neutral hybrid (NNH) performance (success) of the human microbiome at local community level

| Variable (Factor)                        | LR Coefficient<br>(B or Beta) | Standard<br>Error | p-value of<br>Wald Test | Odds Ratio:<br>Exp (B) |
|------------------------------------------|-------------------------------|-------------------|-------------------------|------------------------|
| Community Dominance                      | 0.001210                      | 0.000248          | ***<0.0001              | 1.0012                 |
| X=Ratio of Birth to Death ( <i>b/d</i> ) | 4.847869                      | 0.619410          | ***<0.0001              | 127.4685               |
| Y= Migration of Each Niche               | -1.864535                     | 1.204772          | <i>p</i> =0.1217        | 0.1550                 |
| M=Migration rate Between Niches          | 179.376135                    | 66.538569         | ***0.0070               | 10000+                 |
| Hill Numbers at q=0 (Species Richness)   | -0.001993                     | 0.000223          | ***<0.0001              | 0.9980                 |
| Hill Numbers at q=1 (Shannon Index)      | 0.012003                      | 0.000855          | ***<0.0001              | 1.0121                 |
| Passing NNH at Metacommunity (PM=1)      | 0.854414                      | 0.163204          | ***<0.0001              | 2.3500                 |

#The model predicts the probability for local communities to pass the local neutrality test.

$R^2=0.43$ ; \**p*-value=0.001
