# Supplementary material for: Niche‐neutral theoretic approach to mechanisms underlying the biodiversity and biogeography of human microbiomes
Source: PubMed Central journal article supplement (PMC7896709; doi:10.1111/eva.13116), 2020-10-13
Supplement: EVA-14-322-s002.pdf [file EVA-14-322-s002.pdf]

**Online Supplementary Information (II) (OSI-2) for: Ma ZS (2020)**  
Niche-neutral theoretic approach to the mechanisms underlying the biodiversity and biogeography of human microbiomes. *Evolutionary Applications*.

**Section IV (Table S3-S14)**, exhibiting the detailed fitting results of MSN/NNH models to all the datasets analyzed in this study (*see* Table 1 for a brief introduction on the datasets). The fitting results of 24 samples selected from Tables S3-S14 were illustrated in Tables S1-S2 in the separate OSI-1.

**Detailed test results for the MSN model**

**Table S3.** Test results of fitting MSN (multi-site neutral) model to HMP-oral datasets ( $Sites \geq 2$ ,  $Subjects = 146$ )

**Table S4.** Test results of fitting MSN (multi-site neutral) model to HMP-skin datasets ( $Sites \geq 2$ ,  $Subjects = 159$ )

**Table S5.** Test results of fitting MSN (multi-site neutral) model to HMP-vaginal datasets ( $Sites \geq 2$ ,  $Subjects = 72$ )

**Table S6.** Test results of fitting MSN (multi-site neutral) model to HMP-whole datasets ( $Sites \geq 5$ ,  $Subjects = 172$ )

**Table S7.** Test results of fitting MSN (multi-site neutral) model to Gut datasets ( $Sites = 7$ ,  $Subjects = 11$ )

**Table S8.** Test results of fitting MSN (multi-site neutral) model to Lung datasets ( $Sites = 4$ ,  $Subjects = 139$ )

**Detailed test results for the NNS model**

**Table S9.** Test results of fitting NNH (multi-site neutral) model to HMP-oral datasets ( $Sites \geq 2$ ,  $Subjects = 146$ )

**Table S10.** Test results of fitting NNH (multi-site neutral) model to HMP-skin datasets ( $Sites \geq 2$ ,  $Subjects = 159$ )

**Table S11.** Test results of fitting NNH (multi-site neutral) model to HMP-vaginal datasets ( $Sites \geq 2$ ,  $Subjects = 72$ )

**Table S12.** Test results of fitting NNH (multi-site neutral) model to HMP-whole datasets ( $Sites \geq 5$ ,  $Subjects = 172$ )

**Table S13.** Test results of fitting NNH (multi-site neutral) model to Gut datasets ( $Sites = 7$ ,  $Subjects = 11$ )

**Table S14.** Test results of fitting NNH (multi-site neutral) model to Lung datasets ( $Sites = 4$ ,  $Subjects = 139$ )

## Section IV. Supplementary Tables S3-S14

**Table S3.** Test results of fitting MSN (multi-site neutral) model to HMP-oral datasets ( $Sites \geq 2$ ,  $Subjects=146$ )\*

| ID        | $L_o$       | $\theta$ | $M$ -value | Metacommunity |         |      |          | Local community |       |      |          |
|-----------|-------------|----------|------------|---------------|---------|------|----------|-----------------|-------|------|----------|
|           |             |          |            | $L_M$         | $\#N_M$ | $N$  | ** $P_M$ | $L_L$           | $N_L$ | $N$  | ** $P_L$ |
| 132902142 | -28149.896  | 2154.925 | 714.867    | -29045.219    | 16      | 2500 | 0.994    | -28573.583      | 195   | 2500 | 0.922    |
| 147406386 | -39629.653  | 2660.637 | 408.021    | -40532.103    | 64      | 2500 | 0.974    | -41007.345      | 0     | 2500 | 1.000    |
| 158013734 | -29836.678  | 1924.672 | 733.253    | -30971.008    | 2       | 2500 | 0.999    | -30065.367      | 490   | 2500 | 0.804    |
| 158114885 | -34831.156  | 1654.219 | 1282.435   | -37488.502    | 0       | 2500 | 1.000    | -34572.595      | 2005  | 2500 | 0.198    |
| 158155345 | -30249.865  | 1612.426 | 661.127    | -32466.466    | 0       | 2500 | 1.000    | -30676.119      | 201   | 2500 | 0.920    |
| 158216035 | -40599.565  | 2180.221 | 632.669    | -42970.687    | 0       | 2500 | 1.000    | -41892.541      | 0     | 2500 | 1.000    |
| 158236265 | -33222.074  | 1940.434 | 742.224    | -35987.968    | 0       | 2500 | 1.000    | -34113.351      | 5     | 2500 | 0.998    |
| 158276726 | -36118.692  | 2518.069 | 396.629    | -38031.991    | 0       | 2500 | 1.000    | -37524.500      | 0     | 2500 | 1.000    |
| 158398106 | -64369.255  | 1881.980 | 468.023    | -72032.256    | 0       | 2500 | 1.000    | -67226.641      | 0     | 2500 | 1.000    |
| 158418336 | -76708.868  | 2678.051 | 689.142    | -85287.837    | 0       | 2500 | 1.000    | -79641.220      | 0     | 2500 | 1.000    |
| 158438567 | -96967.545  | 3138.273 | 501.436    | -103507.964   | 0       | 2500 | 1.000    | -102087.984     | 0     | 2500 | 1.000    |
| 158458797 | -86946.748  | 3201.282 | 481.204    | -92073.605    | 0       | 2500 | 1.000    | -90770.075      | 0     | 2500 | 1.000    |
| 158479027 | -40598.315  | 2402.008 | 784.956    | -42041.313    | 0       | 2500 | 1.000    | -41267.532      | 57    | 2500 | 0.977    |
| 158499257 | -37599.734  | 2899.482 | 473.448    | -38495.503    | 39      | 2500 | 0.984    | -38654.841      | 2     | 2500 | 0.999    |
| 158721788 | -37344.407  | 2255.420 | 541.525    | -40336.889    | 0       | 2500 | 1.000    | -38911.847      | 0     | 2500 | 1.000    |
| 158742018 | -83937.462  | 2812.451 | 592.332    | -88521.512    | 0       | 2500 | 1.000    | -86874.338      | 0     | 2500 | 1.000    |
| 158802708 | -44972.417  | 2495.478 | 697.732    | -48880.781    | 0       | 2500 | 1.000    | -47044.796      | 0     | 2500 | 1.000    |
| 158822939 | -68961.361  | 2961.117 | 1055.100   | -74845.022    | 0       | 2500 | 1.000    | -71917.934      | 0     | 2500 | 1.000    |
| 158883629 | -92474.954  | 2815.965 | 560.528    | -99957.468    | 0       | 2500 | 1.000    | -97617.769      | 0     | 2500 | 1.000    |
| 158924089 | -78510.607  | 3724.421 | 1115.656   | -84619.143    | 0       | 2500 | 1.000    | -81938.407      | 0     | 2500 | 1.000    |
| 158944319 | -44189.819  | 2478.016 | 538.149    | -48370.147    | 0       | 2500 | 1.000    | -46713.827      | 0     | 2500 | 1.000    |
| 158964549 | -101198.287 | 2943.816 | 619.967    | -110925.949   | 0       | 2500 | 1.000    | -106722.521     | 0     | 2500 | 1.000    |
| 158984779 | -23664.717  | 1740.129 | 296.026    | -24338.317    | 75      | 2500 | 0.970    | -24723.659      | 0     | 2500 | 1.000    |
| 159005010 | -63044.191  | 2896.621 | 1002.206   | -67414.535    | 0       | 2500 | 1.000    | -65596.404      | 0     | 2500 | 1.000    |
| 159025240 | -32714.209  | 1598.890 | 770.591    | -38791.981    | 0       | 2500 | 1.000    | -34053.086      | 0     | 2500 | 1.000    |
| 159085930 | -58861.096  | 3267.709 | 721.753    | -61403.318    | 0       | 2500 | 1.000    | -61357.170      | 0     | 2500 | 1.000    |
| 159146620 | -114292.375 | 2857.826 | 828.231    | -129677.924   | 0       | 2500 | 1.000    | -120234.155     | 0     | 2500 | 1.000    |
| 159166850 | -122189.810 | 2951.197 | 769.017    | -135960.535   | 0       | 2455 | 1.000    | -129700.872     | 0     | 2455 | 1.000    |
| 159227541 | -92281.907  | 2695.204 | 779.381    | -100452.452   | 0       | 2500 | 1.000    | -95917.367      | 0     | 2500 | 1.000    |
| 159247771 | -46964.694  | 2446.586 | 838.603    | -50637.709    | 0       | 2500 | 1.000    | -48610.887      | 0     | 2500 | 1.000    |
| 159389382 | -85209.559  | 2921.579 | 584.460    | -91672.529    | 0       | 2500 | 1.000    | -88566.797      | 0     | 2500 | 1.000    |
| 159470302 | -77301.160  | 2799.847 | 1383.139   | -87476.135    | 0       | 2500 | 1.000    | -80566.496      | 0     | 2500 | 1.000    |
| 159713063 | -68990.500  | 3114.676 | 782.284    | -73723.063    | 0       | 2500 | 1.000    | -72785.354      | 0     | 2500 | 1.000    |
| 159733294 | -68510.161  | 3058.656 | 1009.953   | -75249.352    | 0       | 2500 | 1.000    | -71802.233      | 0     | 2500 | 1.000    |
| 160744799 | -19692.656  | 1516.039 | 511.685    | -20846.834    | 0       | 2500 | 1.000    | -19947.773      | 362   | 2500 | 0.855    |
| 160825720 | -44761.302  | 2415.848 | 450.315    | -45713.034    | 28      | 2500 | 0.989    | -45111.250      | 368   | 2500 | 0.853    |
| 160866180 | -39276.994  | 2479.616 | 404.759    | -39658.654    | 416     | 2500 | 0.834    | -39656.731      | 286   | 2500 | 0.886    |
| 160886410 | -20864.909  | 1803.579 | 536.542    | -20889.961    | 1135    | 2500 | 0.546    | -20789.910      | 1571  | 2500 | 0.372    |
| 160906640 | -25613.242  | 2185.247 | 505.423    | -26050.681    | 204     | 2500 | 0.918    | -25828.132      | 512   | 2500 | 0.795    |
| 160947100 | -52522.659  | 2350.377 | 646.753    | -54341.709    | 0       | 2500 | 1.000    | -53094.423      | 140   | 2500 | 0.944    |
| 160967330 | -22858.824  | 2013.313 | 418.061    | -22677.590    | 1824    | 2500 | 0.270    | -22856.261      | 1262  | 2500 | 0.495    |
| 160987560 | -23512.755  | 3175.765 | 379.950    | -22531.724    | 2500    | 2500 | 0.000    | -23205.460      | 2223  | 2500 | 0.111    |
| 161007791 | -16763.748  | 1126.384 | 869.248    | -17638.938    | 4       | 2500 | 0.998    | -16541.701      | 2174  | 2500 | 0.130    |
| 161270782 | -18744.255  | 2401.984 | 461.605    | -18036.196    | 2493    | 2496 | 0.001    | -18405.553      | 2370  | 2496 | 0.050    |

|           |             |          |         |             |      |      |       |             |      |      |       |
|-----------|-------------|----------|---------|-------------|------|------|-------|-------------|------|------|-------|
| 161311242 | -14873.264  | 2099.743 | 430.476 | -14213.362  | 2497 | 2500 | 0.001 | -14578.354  | 2366 | 2500 | 0.054 |
| 161412393 | -7176.719   | 1089.440 | 942.832 | -6747.128   | 2499 | 2500 | 0.000 | -6861.289   | 2492 | 2500 | 0.003 |
| 161473083 | -27744.041  | 2905.184 | 349.483 | -27026.288  | 2462 | 2500 | 0.015 | -27795.194  | 1077 | 2500 | 0.569 |
| 161554003 | -23593.300  | 1599.322 | 361.356 | -24834.344  | 1    | 2500 | 1.000 | -24209.574  | 28   | 2500 | 0.989 |
| 178713055 | -30835.242  | 2294.473 | 478.897 | -31605.086  | 57   | 2500 | 0.977 | -31801.049  | 0    | 2500 | 1.000 |
| 184349034 | -15949.216  | 4043.209 | 482.534 | -14645.173  | 2500 | 2500 | 0.000 | -15395.236  | 2479 | 2500 | 0.008 |
| 208027353 | -39377.266  | 2404.514 | 643.093 | -40755.050  | 2    | 2500 | 0.999 | -40129.976  | 17   | 2500 | 0.993 |
| 246515023 | -15522.687  | 2123.168 | 688.241 | -14123.284  | 2500 | 2500 | 0.000 | -14699.120  | 2500 | 2500 | 0.000 |
| 256789458 | -14889.466  | 2752.214 | 416.655 | -14070.258  | 2499 | 2500 | 0.000 | -14623.931  | 2220 | 2500 | 0.112 |
| 275382046 | -11957.964  | 2615.712 | 396.331 | -11015.010  | 2500 | 2500 | 0.000 | -11548.545  | 2446 | 2500 | 0.022 |
| 289996019 | -81508.490  | 2846.668 | 379.084 | -86396.617  | 0    | 2500 | 1.000 | -86287.587  | 0    | 2500 | 1.000 |
| 295137534 | -15636.249  | 1989.932 | 351.264 | -14885.947  | 2498 | 2500 | 0.001 | -15284.063  | 2418 | 2500 | 0.033 |
| 336497421 | -23506.365  | 1919.272 | 384.847 | -23915.894  | 214  | 2500 | 0.914 | -23840.044  | 207  | 2500 | 0.917 |
| 368533040 | -23399.397  | 2298.677 | 507.658 | -22897.248  | 2428 | 2500 | 0.029 | -23018.656  | 2394 | 2500 | 0.042 |
| 370027359 | -27738.038  | 2052.838 | 361.698 | -28313.765  | 122  | 2500 | 0.951 | -28480.254  | 14   | 2500 | 0.994 |
| 370425937 | -33077.081  | 1763.010 | 339.271 | -35017.946  | 0    | 2500 | 1.000 | -34301.331  | 0    | 2500 | 1.000 |
| 375450439 | -72386.760  | 2614.357 | 660.009 | -78613.350  | 0    | 2500 | 1.000 | -74498.927  | 0    | 2500 | 1.000 |
| 404239096 | -33676.191  | 2615.427 | 455.666 | -33725.077  | 1113 | 2500 | 0.555 | -34201.803  | 110  | 2500 | 0.956 |
| 414519462 | -20981.311  | 1464.561 | 339.871 | -22223.898  | 0    | 2500 | 1.000 | -21637.821  | 11   | 2500 | 0.996 |
| 451588811 | -18510.871  | 2276.320 | 372.591 | -17971.987  | 2455 | 2500 | 0.018 | -18379.525  | 1822 | 2500 | 0.271 |
| 465578759 | -36466.713  | 2516.657 | 350.526 | -38548.123  | 0    | 2500 | 1.000 | -38649.629  | 0    | 2500 | 1.000 |
| 492786515 | -23169.138  | 1497.255 | 370.579 | -25027.007  | 0    | 2500 | 1.000 | -24007.852  | 5    | 2500 | 0.998 |
| 508703490 | -21506.127  | 1356.832 | 358.107 | -22327.580  | 18   | 2500 | 0.993 | -21941.927  | 97   | 2500 | 0.961 |
| 514014184 | -5676.375   | 4655.542 | 214.537 | -4734.582   | 2500 | 2500 | 0.000 | -4942.818   | 2500 | 2500 | 0.000 |
| 516889361 | -10291.446  | 6250.090 | 320.356 | -9050.365   | 2500 | 2500 | 0.000 | -9447.098   | 2500 | 2500 | 0.000 |
| 517810313 | -32261.467  | 1652.011 | 473.197 | -34592.240  | 0    | 2500 | 1.000 | -33365.091  | 0    | 2500 | 1.000 |
| 553359145 | -33397.426  | 2337.000 | 423.335 | -34559.913  | 8    | 2500 | 0.997 | -34687.147  | 2    | 2500 | 0.999 |
| 604812005 | -16517.933  | 1954.149 | 524.509 | -15784.677  | 2500 | 2500 | 0.000 | -16054.942  | 2492 | 2500 | 0.003 |
| 612472597 | -42207.078  | 2309.823 | 774.721 | -44560.852  | 0    | 2500 | 1.000 | -43177.345  | 6    | 2500 | 0.998 |
| 638754422 | -25845.164  | 3345.741 | 409.663 | -24668.795  | 2500 | 2500 | 0.000 | -25506.466  | 2229 | 2500 | 0.108 |
| 643185023 | -21157.198  | 2191.206 | 306.581 | -21357.484  | 620  | 2498 | 0.752 | -21754.785  | 31   | 2498 | 0.988 |
| 650853796 | -22183.678  | 2386.368 | 545.351 | -21875.833  | 2168 | 2500 | 0.133 | -22146.954  | 1410 | 2500 | 0.436 |
| 658594300 | -15197.119  | 2350.326 | 295.523 | -14880.926  | 2249 | 2500 | 0.100 | -15294.511  | 816  | 2500 | 0.674 |
| 663835652 | -33143.491  | 2203.340 | 618.494 | -35002.997  | 0    | 2500 | 1.000 | -34073.345  | 2    | 2500 | 0.999 |
| 668248235 | -38465.998  | 2351.006 | 399.602 | -39977.172  | 1    | 2500 | 1.000 | -40079.145  | 0    | 2500 | 1.000 |
| 682449369 | -41650.435  | 2331.818 | 654.239 | -42633.089  | 40   | 2500 | 0.984 | -42521.993  | 11   | 2500 | 0.996 |
| 686765762 | -42738.456  | 2105.034 | 404.896 | -45130.563  | 0    | 2500 | 1.000 | -43800.724  | 3    | 2500 | 0.999 |
| 737052003 | -43866.765  | 2417.501 | 493.087 | -46898.392  | 0    | 2500 | 1.000 | -45844.116  | 0    | 2500 | 1.000 |
| 763395383 | -39399.449  | 2191.054 | 643.652 | -42358.184  | 0    | 2500 | 1.000 | -40755.702  | 0    | 2500 | 1.000 |
| 763435843 | -45121.530  | 2463.324 | 542.708 | -48526.126  | 0    | 2500 | 1.000 | -47489.305  | 0    | 2500 | 1.000 |
| 763456073 | -35740.481  | 1619.820 | 643.238 | -38815.270  | 0    | 2500 | 1.000 | -36768.058  | 3    | 2500 | 0.999 |
| 763476303 | -25254.611  | 2047.887 | 329.300 | -25611.389  | 373  | 2500 | 0.851 | -25885.694  | 45   | 2500 | 0.982 |
| 763516763 | -56836.625  | 2395.623 | 315.747 | -60062.303  | 0    | 2500 | 1.000 | -59594.117  | 0    | 2500 | 1.000 |
| 763536994 | -111957.794 | 2611.874 | 553.405 | -122696.937 | 0    | 2500 | 1.000 | -117505.832 | 0    | 2500 | 1.000 |
| 763557224 | -23336.404  | 1681.502 | 290.813 | -24062.709  | 48   | 2500 | 0.981 | -24199.997  | 3    | 2500 | 0.999 |
| 763597684 | -107114.466 | 2901.238 | 701.464 | -117945.598 | 0    | 2500 | 1.000 | -113476.724 | 0    | 2500 | 1.000 |
| 763638144 | -66723.402  | 3130.507 | 500.377 | -69516.446  | 0    | 2500 | 1.000 | -68934.604  | 0    | 2500 | 1.000 |
| 763698834 | -94807.647  | 2768.476 | 605.918 | -103747.730 | 0    | 2500 | 1.000 | -100830.196 | 0    | 2500 | 1.000 |
| 763719065 | -56297.654  | 2216.897 | 429.894 | -58898.635  | 0    | 2500 | 1.000 | -57949.010  | 0    | 2500 | 1.000 |
| 763759525 | -67098.219  | 3205.975 | 423.210 | -70044.641  | 0    | 2500 | 1.000 | -69389.027  | 0    | 2500 | 1.000 |
| 763820215 | -57724.372  | 2502.718 | 327.113 | -62374.237  | 0    | 2500 | 1.000 | -60903.429  | 0    | 2500 | 1.000 |

|           |            |          |         |             |      |      |       |             |      |      |       |
|-----------|------------|----------|---------|-------------|------|------|-------|-------------|------|------|-------|
| 763840445 | -85633.980 | 2825.394 | 601.899 | -91836.218  | 0    | 2500 | 1.000 | -88813.960  | 0    | 2500 | 1.000 |
| 763860675 | -76053.098 | 2738.367 | 471.634 | -81575.815  | 0    | 2500 | 1.000 | -79227.834  | 0    | 2500 | 1.000 |
| 763880905 | -39181.102 | 2820.142 | 411.100 | -40243.541  | 22   | 2500 | 0.991 | -40560.141  | 0    | 2500 | 1.000 |
| 763901136 | -62616.968 | 3356.069 | 587.197 | -63710.788  | 49   | 2500 | 0.980 | -63986.336  | 2    | 2500 | 0.999 |
| 763921366 | -39959.683 | 2305.100 | 637.697 | -41898.458  | 0    | 2500 | 1.000 | -41150.244  | 0    | 2500 | 1.000 |
| 763982056 | -75951.555 | 2381.576 | 483.364 | -85733.975  | 0    | 2500 | 1.000 | -80003.276  | 0    | 2500 | 1.000 |
| 764002286 | -78499.644 | 2668.262 | 479.383 | -83809.790  | 0    | 2500 | 1.000 | -82972.875  | 0    | 2500 | 1.000 |
| 764042746 | -55962.415 | 2906.437 | 422.878 | -56836.251  | 136  | 2500 | 0.946 | -57392.047  | 1    | 2500 | 1.000 |
| 764062976 | -84185.210 | 3667.544 | 410.376 | -87844.572  | 0    | 2500 | 1.000 | -87743.638  | 0    | 2500 | 1.000 |
| 764083206 | -97772.143 | 2590.519 | 685.989 | -109339.413 | 0    | 2500 | 1.000 | -102938.481 | 0    | 2500 | 1.000 |
| 764143897 | -88929.363 | 2418.709 | 600.234 | -96945.678  | 0    | 2500 | 1.000 | -93240.958  | 0    | 2500 | 1.000 |
| 764184357 | -71984.655 | 2548.266 | 561.822 | -76443.011  | 0    | 2500 | 1.000 | -74544.380  | 0    | 2500 | 1.000 |
| 764224817 | -82802.486 | 2845.497 | 467.739 | -88816.632  | 0    | 2500 | 1.000 | -86772.631  | 0    | 2500 | 1.000 |
| 764245047 | -30115.037 | 2133.894 | 321.696 | -31523.028  | 1    | 2500 | 1.000 | -31449.471  | 0    | 2500 | 1.000 |
| 764285508 | -35556.089 | 1698.588 | 508.160 | -37238.590  | 1    | 2500 | 1.000 | -36834.436  | 0    | 2500 | 1.000 |
| 764305738 | -94940.470 | 2738.573 | 602.927 | -103685.790 | 0    | 2500 | 1.000 | -99979.524  | 0    | 2500 | 1.000 |
| 764325968 | -77851.926 | 3160.779 | 432.542 | -81883.279  | 0    | 2500 | 1.000 | -81281.997  | 0    | 2500 | 1.000 |
| 764346198 | -55600.663 | 2728.536 | 382.635 | -56779.817  | 36   | 2500 | 0.986 | -57430.119  | 0    | 2500 | 1.000 |
| 764366428 | -27566.433 | 2104.950 | 297.157 | -28333.443  | 53   | 2500 | 0.979 | -28666.743  | 1    | 2500 | 1.000 |
| 764447348 | -51989.701 | 2175.039 | 296.418 | -56819.344  | 0    | 2500 | 1.000 | -54669.831  | 0    | 2500 | 1.000 |
| 764467579 | -64230.025 | 3154.598 | 509.305 | -65655.920  | 17   | 2500 | 0.993 | -65999.103  | 1    | 2500 | 1.000 |
| 764487809 | -70510.202 | 2665.743 | 404.451 | -77359.632  | 0    | 2500 | 1.000 | -74486.975  | 0    | 2500 | 1.000 |
| 764508039 | -30634.818 | 2470.292 | 387.691 | -31149.195  | 196  | 2500 | 0.922 | -31489.167  | 8    | 2500 | 0.997 |
| 764588959 | -33181.657 | 2051.867 | 391.032 | -34350.954  | 5    | 2500 | 0.998 | -34326.925  | 0    | 2500 | 1.000 |
| 764649650 | -34469.111 | 2288.574 | 439.889 | -35707.138  | 2    | 2500 | 0.999 | -35493.976  | 4    | 2500 | 0.998 |
| 764669880 | -78283.052 | 2793.590 | 696.304 | -84501.472  | 0    | 2500 | 1.000 | -81117.992  | 0    | 2500 | 1.000 |
| 764750800 | -41566.386 | 2665.514 | 607.135 | -42801.617  | 7    | 2500 | 0.997 | -42591.998  | 1    | 2500 | 1.000 |
| 764811490 | -45373.316 | 3059.276 | 456.365 | -47242.350  | 0    | 2500 | 1.000 | -47212.627  | 0    | 2500 | 1.000 |
| 764831721 | -39625.249 | 2624.072 | 620.903 | -41507.551  | 0    | 2500 | 1.000 | -40733.464  | 1    | 2500 | 1.000 |
| 764872181 | -32753.577 | 1615.143 | 566.134 | -34674.172  | 0    | 2500 | 1.000 | -33509.678  | 12   | 2500 | 0.995 |
| 764892411 | -35055.514 | 2016.306 | 613.286 | -37119.933  | 0    | 2500 | 1.000 | -35790.707  | 20   | 2500 | 0.992 |
| 764953101 | -39030.591 | 2709.597 | 537.037 | -40357.081  | 3    | 2500 | 0.999 | -40203.891  | 0    | 2500 | 1.000 |
| 765013792 | -34740.131 | 2137.018 | 621.118 | -36324.694  | 0    | 2500 | 1.000 | -35587.884  | 10   | 2500 | 0.996 |
| 765034022 | -35875.530 | 2232.081 | 592.538 | -37124.424  | 2    | 2500 | 0.999 | -36494.583  | 59   | 2500 | 0.976 |
| 765074482 | -54405.493 | 2840.135 | 465.019 | -55819.018  | 9    | 2500 | 0.996 | -55776.585  | 3    | 2500 | 0.999 |
| 765094712 | -52130.136 | 2018.932 | 514.281 | -57934.142  | 0    | 2500 | 1.000 | -54456.593  | 0    | 2500 | 1.000 |
| 765155402 | -30256.250 | 1976.290 | 364.171 | -30674.810  | 375  | 2500 | 0.850 | -31047.354  | 21   | 2500 | 0.992 |
| 765195863 | -29701.096 | 2202.275 | 430.005 | -30283.849  | 118  | 2500 | 0.953 | -30236.127  | 91   | 2500 | 0.964 |
| 765216093 | -34114.185 | 2083.181 | 507.170 | -35265.073  | 6    | 2500 | 0.998 | -34748.246  | 42   | 2500 | 0.983 |
| 765256553 | -35472.354 | 2195.862 | 705.776 | -37153.494  | 0    | 2500 | 1.000 | -36274.640  | 9    | 2500 | 0.996 |
| 765276783 | -30945.212 | 1905.586 | 408.842 | -32154.311  | 2    | 2500 | 0.999 | -31976.359  | 1    | 2500 | 1.000 |
| 765317243 | -24229.438 | 1615.710 | 459.991 | -26143.108  | 0    | 2500 | 1.000 | -24942.885  | 12   | 2500 | 0.995 |
| 765337473 | -31999.184 | 2196.359 | 476.943 | -33129.830  | 4    | 2500 | 0.998 | -32736.934  | 27   | 2500 | 0.989 |
| 765377934 | -20735.739 | 1764.779 | 493.479 | -21403.695  | 22   | 2500 | 0.991 | -21234.367  | 50   | 2500 | 0.980 |
| 765560005 | -43318.411 | 2679.127 | 630.995 | -45408.868  | 0    | 2500 | 1.000 | -44631.456  | 0    | 2500 | 1.000 |
| 809635352 | -22121.096 | 1837.866 | 385.579 | -22452.483  | 319  | 2500 | 0.872 | -22388.431  | 375  | 2500 | 0.850 |
| 863126187 | -43724.829 | 2968.384 | 483.304 | -45178.643  | 1    | 2500 | 1.000 | -45218.738  | 0    | 2500 | 1.000 |
| 892969023 | -17342.550 | 1637.791 | 691.468 | -16846.391  | 2470 | 2500 | 0.012 | -16890.183  | 2480 | 2500 | 0.008 |
| 937495960 | -22416.226 | 1971.588 | 382.472 | -22502.748  | 955  | 2500 | 0.618 | -22607.623  | 536  | 2500 | 0.786 |
| 953045535 | -36031.562 | 3294.860 | 366.865 | -35839.563  | 1697 | 2500 | 0.321 | -36581.243  | 157  | 2500 | 0.937 |
| 970836795 | -27717.931 | 2278.030 | 471.689 | -28291.527  | 106  | 2500 | 0.958 | -28107.292  | 191  | 2500 | 0.924 |

|              |             |             |
|--------------|-------------|-------------|
| Passing Rate | 129 (88.4%) | 135 (92.5%) |
|--------------|-------------|-------------|

\* $N=2500$  is the number of Gibb samples selected from 25000 simulated communities (*i.e.*, every tenth iteration of the last 25,000 Gibbs samples), it is chosen to compute the pseudo  $p$ -value (as explained below) for conducting the neutrality test.  $L_0$  is the *actual log-likelihood*.  $\theta$  is the median of biodiversity parameters computed from 25,000 times of simulations.  $M$ -value is the average medians of the migration rates of local communities in each meta-community, also computed from 25,000 times of simulations.  $L_M$  is the median of the log-likelihoods of the simulated neutral meta-community samples; and  $N_M$  is the number of simulated neutral meta-community samples with their likelihoods not exceeding the actual likelihood satisfying  $L \leq L_0$  (where  $L$  and  $L_0$  are the simulated and actual likelihood respectively),  $P_M = N_M / N$  is the pseudo  $p$ -value for testing the neutrality at meta-community level; if  $P_M > 0.05$ , the meta-community satisfies the MSN model.  $L_L$  is the median of the log-likelihoods of the simulated local community samples, and  $N_L$  is the number of simulated local community samples with their likelihoods not exceeding the  $L_0$ , *i.e.*,  $L \leq L_0$  (where  $L$  and  $L_0$  are the simulated and actual likelihood respectively),  $P_L = N_L / N$ , is the pseudo  $p$ -value for testing the neutrality at the local community level; if  $P_L > 0.05$ , the local community satisfies the neutral model. See Fig 2 for an example of fitting the MSN model.

\*\*Due to the typo/error in Harris *et al.* (2017), the  $P_M$ -values exhibited here are adjusted as ( $P_M = 1 - P_{MS}$ ), where  $P_{MS}$  is output from their computational program. Similarly, the  $P_L$ -values are adjusted as ( $P_L = 1 - P_{LS}$ ), where  $P_{LS}$  is output from their computational program.

#The  $N_M$  and  $N_L$  reported here are from the output of Harris *et al.* (2017) software. When computing the  $P$ -value, their “complements” ( $2500 - N_M$ ) or ( $2500 - N_L$ ) should be used to circumvent their error.

**Table S4.** Test results of fitting MSN (multi-site neutral) model to HMP-skin datasets ( $Sites \geq 2$ ,  $Subjects = 159$ )\*

| ID        | $L_o$      | $\theta$ | $M$ -value | Metacommunity |         |      |          | Local community |         |      |          |
|-----------|------------|----------|------------|---------------|---------|------|----------|-----------------|---------|------|----------|
|           |            |          |            | $L_M$         | $\#N_M$ | $N$  | ** $P_M$ | $L_L$           | $\#N_L$ | $N$  | ** $P_L$ |
| 132902142 | -3150.748  | 536.140  | 138.368    | -3216.947     | 716     | 2500 | 0.714    | -3202.208       | 1083    | 2500 | 0.567    |
| 147406386 | -7817.265  | 609.296  | 414.002    | -9609.946     | 0       | 2500 | 1.000    | -8361.098       | 0       | 2500 | 1.000    |
| 158013734 | -8579.881  | 918.487  | 322.799    | -9322.092     | 0       | 2500 | 1.000    | -8937.994       | 58      | 2500 | 0.977    |
| 158114885 | -15328.765 | 2172.028 | 444.152    | -15445.276    | 805     | 2500 | 0.678    | -15653.011      | 184     | 2500 | 0.926    |
| 158155345 | -14765.667 | 2229.517 | 271.131    | -14830.981    | 998     | 2500 | 0.601    | -15315.301      | 23      | 2500 | 0.991    |
| 158216035 | -13878.884 | 2515.791 | 417.510    | -13609.503    | 2138    | 2500 | 0.145    | -14075.009      | 456     | 2500 | 0.818    |
| 158236265 | -9340.662  | 1997.491 | 270.135    | -8926.513     | 2435    | 2500 | 0.026    | -9321.278       | 1340    | 2500 | 0.464    |
| 158276726 | -7677.723  | 985.176  | 208.387    | -8004.865     | 102     | 2500 | 0.959    | -8056.610       | 33      | 2500 | 0.987    |
| 158398106 | -12787.830 | 901.454  | 2291.023   | -14995.177    | 0       | 2500 | 1.000    | -12673.323      | 1911    | 2500 | 0.236    |
| 158418336 | -20390.865 | 1421.262 | 1999.725   | -23165.676    | 0       | 2500 | 1.000    | -20208.147      | 1981    | 2500 | 0.208    |
| 158438567 | -8545.663  | 1618.594 | 331.304    | -8102.873     | 2491    | 2500 | 0.004    | -8320.037       | 2338    | 2500 | 0.065    |
| 158458797 | -12088.773 | 2185.194 | 250.685    | -12015.665    | 1563    | 2500 | 0.375    | -12315.639      | 368     | 2500 | 0.853    |
| 158479027 | -4415.166  | 580.143  | 1326.766   | -4428.803     | 1131    | 2500 | 0.548    | -4095.360       | 2498    | 2500 | 0.001    |
| 158721788 | -5831.145  | 853.538  | 3042.935   | -5565.128     | 2454    | 2500 | 0.018    | -5420.018       | 2500    | 2500 | 0.000    |
| 158742018 | -18754.937 | 1869.372 | 542.474    | -20476.187    | 0       | 2500 | 1.000    | -19393.327      | 7       | 2500 | 0.997    |
| 158802708 | -24159.491 | 4652.512 | 511.050    | -23166.498    | 2493    | 2500 | 0.003    | -24061.343      | 1576    | 2500 | 0.370    |
| 158822939 | -23661.584 | 2269.718 | 2885.786   | -25436.723    | 0       | 2500 | 1.000    | -23439.901      | 2000    | 2500 | 0.200    |
| 158883629 | -16670.391 | 1485.507 | 711.618    | -18770.834    | 0       | 2500 | 1.000    | -17227.546      | 11      | 2500 | 0.996    |
| 158924089 | -18421.644 | 1434.284 | 2065.599   | -20877.968    | 0       | 2500 | 1.000    | -18527.705      | 764     | 2500 | 0.694    |
| 158944319 | -5311.167  | 697.169  | 5214.276   | -5244.092     | 1751    | 2500 | 0.300    | -4972.622       | 2500    | 2500 | 0.000    |
| 158964549 | -21347.919 | 2653.796 | 260.264    | -21300.591    | 1400    | 2500 | 0.440    | -21714.054      | 236     | 2500 | 0.906    |
| 159005010 | -6046.649  | 3617.823 | 89.004     | -5374.200     | 2500    | 2500 | 0.000    | -5595.182       | 2489    | 2500 | 0.004    |
| 159025240 | -6306.527  | 905.256  | 1993.273   | -6057.888     | 2408    | 2497 | 0.036    | -5856.924       | 2497    | 2497 | 0.000    |
| 159085930 | -12707.305 | 2732.980 | 229.411    | -12144.826    | 2471    | 2500 | 0.012    | -12661.420      | 1446    | 2500 | 0.422    |
| 159146620 | -21796.169 | 2188.486 | 642.178    | -24030.104    | 0       | 2500 | 1.000    | -22554.899      | 5       | 2500 | 0.998    |
| 159166850 | -53549.350 | 2044.105 | 3069.945   | -66717.565    | 0       | 2500 | 1.000    | -54569.666      | 4       | 2500 | 0.998    |
| 159227541 | -18282.420 | 1948.198 | 588.045    | -19018.914    | 11      | 2500 | 0.996    | -18785.868      | 26      | 2500 | 0.990    |
| 159247771 | -8365.786  | 1410.548 | 194.588    | -8228.113     | 1928    | 2500 | 0.229    | -8520.295       | 486     | 2500 | 0.806    |
| 159389382 | -13891.490 | 1093.902 | 987.027    | -16054.213    | 0       | 2500 | 1.000    | -14251.106      | 88      | 2500 | 0.965    |
| 159470302 | -24882.886 | 4255.843 | 503.894    | -25434.090    | 144     | 2500 | 0.942    | -26049.085      | 1       | 2500 | 1.000    |
| 159713063 | -24472.321 | 1863.612 | 1337.203   | -27738.517    | 0       | 2500 | 1.000    | -25495.884      | 0       | 2500 | 1.000    |
| 159733294 | -17115.617 | 2099.169 | 469.534    | -18376.600    | 0       | 2500 | 1.000    | -18069.379      | 0       | 2500 | 1.000    |
| 160744799 | -2633.176  | 2473.084 | 76.182     | -2349.760     | 2469    | 2498 | 0.012    | -2442.813       | 2364    | 2498 | 0.054    |
| 160825720 | -18982.093 | 2251.520 | 879.480    | -18459.554    | 2471    | 2498 | 0.011    | -18651.800      | 2400    | 2498 | 0.039    |
| 160866180 | -11184.014 | 2282.764 | 310.724    | -10454.138    | 2500    | 2500 | 0.000    | -10921.722      | 2285    | 2500 | 0.086    |
| 160886410 | -7213.756  | 1077.513 | 915.365    | -7021.499     | 2236    | 2500 | 0.106    | -6903.096       | 2477    | 2500 | 0.009    |
| 160906640 | -6394.957  | 1024.170 | 3176.388   | -6141.311     | 2425    | 2500 | 0.030    | -5961.675       | 2500    | 2500 | 0.000    |
| 160947100 | -14146.419 | 2607.071 | 598.390    | -13020.005    | 2499    | 2500 | 0.000    | -13556.393      | 2499    | 2500 | 0.000    |
| 160967330 | -10304.762 | 1002.092 | 2859.186   | -10212.743    | 1697    | 2500 | 0.321    | -9851.933       | 2499    | 2500 | 0.000    |
| 160987560 | -11503.150 | 1707.760 | 1629.485   | -10680.152    | 2500    | 2500 | 0.000    | -10852.340      | 2500    | 2500 | 0.000    |
| 161007791 | -10516.723 | 1459.141 | 934.300    | -9801.460     | 2500    | 2500 | 0.000    | -10008.088      | 2500    | 2500 | 0.000    |
| 161270782 | -10525.211 | 1380.380 | 1399.554   | -10086.222    | 2486    | 2500 | 0.006    | -10037.588      | 2500    | 2500 | 0.000    |
| 161311242 | -9010.558  | 904.009  | 1499.163   | -9024.971     | 1151    | 2500 | 0.540    | -8673.652       | 2479    | 2500 | 0.008    |
| 161331472 | -3542.948  | 645.032  | 1730.440   | -3182.381     | 2500    | 2500 | 0.000    | -3281.389       | 2500    | 2500 | 0.000    |
| 161412393 | -12216.948 | 947.932  | 2133.271   | -14684.709    | 0       | 2500 | 1.000    | -12416.025      | 292     | 2500 | 0.883    |
| 161473083 | -4079.363  | 751.623  | 167.613    | -4012.533     | 1770    | 2500 | 0.292    | -4081.449       | 1228    | 2500 | 0.509    |

|           |            |          |          |            |      |      |       |            |      |      |       |
|-----------|------------|----------|----------|------------|------|------|-------|------------|------|------|-------|
| 161554003 | -8986.362  | 2119.088 | 316.794  | -8446.903  | 2492 | 2500 | 0.003 | -8811.066  | 2163 | 2500 | 0.135 |
| 178713055 | -3303.050  | 1101.148 | 129.142  | -3060.405  | 2462 | 2500 | 0.015 | -3214.551  | 1972 | 2500 | 0.211 |
| 184349034 | -10867.765 | 1135.774 | 462.728  | -11721.899 | 0    | 2500 | 1.000 | -11227.166 | 67   | 2500 | 0.973 |
| 208027353 | -8486.561  | 973.561  | 278.383  | -9137.688  | 1    | 2500 | 1.000 | -8808.143  | 64   | 2500 | 0.974 |
| 246515023 | -13061.891 | 1326.694 | 1473.339 | -14250.315 | 0    | 2500 | 1.000 | -12936.757 | 1902 | 2500 | 0.239 |
| 256789458 | -8379.605  | 792.748  | 657.397  | -9675.870  | 0    | 2500 | 1.000 | -8581.707  | 262  | 2500 | 0.895 |
| 275382046 | -5672.255  | 1108.766 | 150.122  | -5756.999  | 762  | 2500 | 0.695 | -5966.841  | 67   | 2500 | 0.973 |
| 295137534 | -6596.496  | 1501.996 | 240.886  | -6280.939  | 2426 | 2500 | 0.030 | -6517.855  | 1751 | 2500 | 0.300 |
| 336497421 | -10755.248 | 1628.923 | 1991.210 | -10279.149 | 2484 | 2500 | 0.006 | -10291.267 | 2499 | 2500 | 0.000 |
| 338793263 | -6836.932  | 725.555  | 813.375  | -7682.389  | 0    | 2500 | 1.000 | -6941.470  | 535  | 2500 | 0.786 |
| 355657046 | -8614.769  | 665.277  | 1519.789 | -9658.084  | 0    | 2500 | 1.000 | -8457.538  | 2193 | 2500 | 0.123 |
| 368533040 | -11977.845 | 1045.352 | 1325.337 | -13468.230 | 0    | 2500 | 1.000 | -11946.276 | 1426 | 2500 | 0.430 |
| 370027359 | -12904.096 | 678.241  | 2355.370 | -15322.959 | 0    | 2500 | 1.000 | -12836.049 | 1613 | 2500 | 0.355 |
| 370425937 | -12412.673 | 1064.496 | 1896.095 | -14348.036 | 0    | 2500 | 1.000 | -12439.706 | 1103 | 2500 | 0.559 |
| 375450439 | -7495.728  | 955.545  | 378.642  | -7945.748  | 21   | 2500 | 0.992 | -7551.431  | 910  | 2500 | 0.636 |
| 404239096 | -4844.262  | 485.908  | 3440.926 | -5249.337  | 8    | 2500 | 0.997 | -4647.237  | 2458 | 2500 | 0.017 |
| 414519462 | -25841.966 | 2981.572 | 791.267  | -26708.365 | 11   | 2500 | 0.996 | -26395.386 | 57   | 2500 | 0.977 |
| 451588811 | -11006.941 | 1066.448 | 3900.744 | -11793.663 | 0    | 2500 | 1.000 | -10679.396 | 2462 | 2500 | 0.015 |
| 465578759 | -8165.256  | 817.446  | 627.527  | -9179.088  | 0    | 2500 | 1.000 | -8214.501  | 958  | 2500 | 0.617 |
| 492786515 | -8218.672  | 794.047  | 760.816  | -9127.002  | 0    | 2500 | 1.000 | -8216.460  | 1263 | 2500 | 0.495 |
| 508703490 | -4854.902  | 543.421  | 1101.785 | -5325.347  | 4    | 2500 | 0.998 | -4786.819  | 1853 | 2500 | 0.259 |
| 516889361 | -10308.518 | 1884.622 | 493.032  | -9920.277  | 2456 | 2500 | 0.018 | -10158.071 | 2063 | 2500 | 0.175 |
| 517810313 | -12988.735 | 986.151  | 961.207  | -15799.483 | 0    | 2500 | 1.000 | -13621.700 | 0    | 2500 | 1.000 |
| 550534656 | -12399.021 | 1400.120 | 478.725  | -13476.524 | 0    | 2500 | 1.000 | -12949.968 | 7    | 2500 | 0.997 |
| 553359145 | -9354.714  | 850.295  | 624.016  | -10561.150 | 0    | 2500 | 1.000 | -9493.522  | 501  | 2500 | 0.800 |
| 604812005 | -6443.223  | 819.636  | 2833.046 | -6191.813  | 2420 | 2500 | 0.032 | -6081.463  | 2499 | 2500 | 0.000 |
| 612472597 | -7517.612  | 816.459  | 836.247  | -7717.288  | 333  | 2500 | 0.867 | -7343.668  | 2209 | 2500 | 0.116 |
| 638754422 | -10009.954 | 912.817  | 1132.502 | -11480.960 | 0    | 2500 | 1.000 | -10029.135 | 1116 | 2500 | 0.554 |
| 643185023 | -1250.623  | 290.414  | 25.053   | -1216.688  | 1661 | 2500 | 0.336 | -1269.238  | 1013 | 2500 | 0.595 |
| 650853796 | -8790.728  | 1792.361 | 434.648  | -8457.114  | 2420 | 2500 | 0.032 | -8734.898  | 1574 | 2500 | 0.370 |
| 658594300 | -2164.170  | 1319.044 | 61.859   | -1907.982  | 2486 | 2500 | 0.006 | -2003.911  | 2365 | 2500 | 0.054 |
| 668248235 | -15736.627 | 1586.611 | 771.247  | -17482.504 | 0    | 2500 | 1.000 | -16136.448 | 87   | 2500 | 0.965 |
| 675950834 | -6123.076  | 757.745  | 1535.467 | -6058.968  | 1668 | 2500 | 0.333 | -5810.717  | 2491 | 2500 | 0.004 |
| 682102541 | -6684.985  | 768.708  | 330.965  | -7756.768  | 0    | 2500 | 1.000 | -7177.681  | 1    | 2500 | 1.000 |
| 682449369 | -5417.223  | 923.288  | 166.887  | -5405.194  | 1330 | 2500 | 0.468 | -5478.521  | 815  | 2500 | 0.674 |
| 686765762 | -29772.170 | 2696.289 | 589.318  | -30089.293 | 459  | 2500 | 0.816 | -30330.676 | 65   | 2500 | 0.974 |
| 706846339 | -5849.917  | 766.121  | 2521.035 | -5790.623  | 1685 | 2500 | 0.326 | -5536.917  | 2491 | 2500 | 0.004 |
| 737052003 | -5410.714  | 641.375  | 1049.867 | -5640.904  | 150  | 2500 | 0.940 | -5366.758  | 1672 | 2500 | 0.331 |
| 739574095 | -3015.022  | 394.654  | 389.209  | -3392.594  | 0    | 2500 | 1.000 | -3098.111  | 450  | 2500 | 0.820 |
| 763395383 | -9832.191  | 901.044  | 1453.609 | -10425.454 | 5    | 2500 | 0.998 | -9661.554  | 2166 | 2500 | 0.134 |
| 763435843 | -6473.137  | 694.300  | 927.452  | -6734.881  | 166  | 2498 | 0.934 | -6377.088  | 2040 | 2498 | 0.183 |
| 763456073 | -3552.537  | 504.164  | 1159.975 | -3682.488  | 280  | 2500 | 0.888 | -3469.632  | 2086 | 2500 | 0.166 |
| 763476303 | -10340.747 | 1058.620 | 236.438  | -11635.540 | 0    | 2500 | 1.000 | -11330.404 | 0    | 2500 | 1.000 |
| 763516763 | -16432.356 | 1329.472 | 688.485  | -18241.436 | 0    | 2500 | 1.000 | -16897.474 | 94   | 2500 | 0.962 |
| 763536994 | -32642.285 | 1829.577 | 492.773  | -40547.463 | 0    | 2500 | 1.000 | -35682.094 | 0    | 2500 | 1.000 |
| 763597684 | -40734.753 | 2317.569 | 1311.300 | -49524.527 | 0    | 2500 | 1.000 | -43658.460 | 0    | 2500 | 1.000 |
| 763638144 | -2194.458  | 484.504  | 58.947   | -2142.694  | 1735 | 2500 | 0.306 | -2223.510  | 976  | 2500 | 0.610 |
| 763678604 | -23417.894 | 1219.138 | 449.452  | -29274.734 | 0    | 2500 | 1.000 | -25493.672 | 0    | 2500 | 1.000 |
| 763698834 | -35909.549 | 1646.739 | 784.180  | -45506.112 | 0    | 2500 | 1.000 | -38947.882 | 0    | 2500 | 1.000 |
| 763719065 | -6401.659  | 934.070  | 69.299   | -6828.120  | 38   | 2500 | 0.985 | -6867.425  | 6    | 2500 | 0.998 |
| 763759525 | -22013.092 | 2048.790 | 396.532  | -24234.178 | 0    | 2500 | 1.000 | -23396.862 | 0    | 2500 | 1.000 |

|           |            |          |          |            |      |      |       |            |      |      |       |
|-----------|------------|----------|----------|------------|------|------|-------|------------|------|------|-------|
| 763820215 | -6620.059  | 1787.667 | 107.248  | -6382.886  | 2228 | 2500 | 0.109 | -6664.319  | 1009 | 2500 | 0.596 |
| 763840445 | -13185.098 | 1086.339 | 292.178  | -14831.976 | 0    | 2500 | 1.000 | -13810.306 | 11   | 2500 | 0.996 |
| 763860675 | -15366.241 | 1999.912 | 255.787  | -16222.171 | 3    | 2500 | 0.999 | -16252.346 | 1    | 2500 | 1.000 |
| 763880905 | -24840.396 | 1161.863 | 421.318  | -32032.440 | 0    | 2500 | 1.000 | -27369.612 | 0    | 2500 | 1.000 |
| 763901136 | -11964.264 | 1344.512 | 92.247   | -12835.092 | 2    | 2500 | 0.999 | -12852.246 | 1    | 2500 | 1.000 |
| 763921366 | -9861.581  | 1128.150 | 234.522  | -10664.034 | 0    | 2500 | 1.000 | -10455.168 | 3    | 2500 | 0.999 |
| 763982056 | -21752.554 | 1468.495 | 607.084  | -24726.348 | 0    | 2500 | 1.000 | -23123.569 | 0    | 2500 | 1.000 |
| 764002286 | -23387.433 | 1375.302 | 301.783  | -28904.238 | 0    | 2500 | 1.000 | -25877.890 | 0    | 2500 | 1.000 |
| 764042746 | -5292.934  | 1797.560 | 96.365   | -5106.600  | 2105 | 2500 | 0.158 | -5313.328  | 1123 | 2500 | 0.551 |
| 764062976 | -5773.869  | 1949.659 | 102.653  | -5212.071  | 2499 | 2500 | 0.000 | -5463.011  | 2435 | 2500 | 0.026 |
| 764083206 | -18183.951 | 899.703  | 386.698  | -23237.035 | 0    | 2500 | 1.000 | -20004.967 | 0    | 2500 | 1.000 |
| 764143897 | -9603.356  | 1278.429 | 163.781  | -9623.284  | 1144 | 2500 | 0.542 | -9831.080  | 233  | 2500 | 0.907 |
| 764184357 | -9648.926  | 553.922  | 1391.301 | -11598.240 | 0    | 2500 | 1.000 | -9343.912  | 2455 | 2500 | 0.018 |
| 764224817 | -14837.047 | 1063.624 | 975.328  | -16274.702 | 0    | 2500 | 1.000 | -14699.238 | 1848 | 2500 | 0.261 |
| 764245047 | -4120.941  | 914.663  | 114.067  | -3811.876  | 2485 | 2500 | 0.006 | -4004.923  | 2069 | 2500 | 0.172 |
| 764305738 | -53097.476 | 2764.209 | 1229.943 | -67478.421 | 0    | 2500 | 1.000 | -57555.148 | 0    | 2500 | 1.000 |
| 764325968 | -16395.980 | 1165.907 | 905.927  | -17913.672 | 0    | 2500 | 1.000 | -16581.717 | 454  | 2500 | 0.818 |
| 764346198 | -6174.475  | 442.055  | 1877.977 | -7376.752  | 0    | 2500 | 1.000 | -6151.399  | 1482 | 2500 | 0.407 |
| 764366428 | -2455.265  | 304.184  | 491.351  | -2487.381  | 913  | 2500 | 0.635 | -2344.317  | 2330 | 2500 | 0.068 |
| 764447348 | -9316.758  | 840.441  | 835.722  | -10211.149 | 0    | 2500 | 1.000 | -9264.813  | 1551 | 2500 | 0.380 |
| 764467579 | -2444.361  | 598.831  | 51.832   | -2423.358  | 1412 | 2500 | 0.435 | -2508.666  | 690  | 2500 | 0.724 |
| 764487809 | -12076.617 | 1054.751 | 463.704  | -12692.550 | 5    | 2500 | 0.998 | -12232.400 | 537  | 2500 | 0.785 |
| 764508039 | -6957.775  | 608.878  | 1035.413 | -7623.823  | 0    | 2500 | 1.000 | -6649.959  | 2487 | 2500 | 0.005 |
| 764588959 | -3002.299  | 435.855  | 209.051  | -2951.663  | 1746 | 2500 | 0.302 | -2916.469  | 2018 | 2500 | 0.193 |
| 764649650 | -7589.192  | 794.948  | 562.067  | -8075.340  | 6    | 2500 | 0.998 | -7503.377  | 1749 | 2500 | 0.300 |
| 764669880 | -13999.861 | 879.911  | 365.234  | -15609.571 | 0    | 2500 | 1.000 | -14429.404 | 39   | 2500 | 0.984 |
| 764710340 | -4465.737  | 1010.283 | 91.803   | -4187.036  | 2446 | 2500 | 0.022 | -4376.137  | 1889 | 2500 | 0.244 |
| 764750800 | -11410.183 | 1060.685 | 973.104  | -12943.700 | 0    | 2500 | 1.000 | -11863.081 | 12   | 2500 | 0.995 |
| 764811490 | -7616.314  | 851.603  | 1002.424 | -7913.462  | 130  | 2500 | 0.948 | -7453.060  | 2206 | 2500 | 0.118 |
| 764831721 | -5642.585  | 1485.345 | 224.914  | -5219.937  | 2491 | 2500 | 0.004 | -5470.351  | 2197 | 2500 | 0.121 |
| 764872181 | -7263.425  | 705.504  | 470.157  | -8936.193  | 0    | 2500 | 1.000 | -7859.659  | 0    | 2500 | 1.000 |
| 764892411 | -6080.588  | 490.028  | 1743.785 | -6866.449  | 0    | 2500 | 1.000 | -5917.760  | 2325 | 2500 | 0.070 |
| 765013792 | -4251.613  | 680.545  | 210.502  | -4166.790  | 1887 | 2500 | 0.245 | -4268.606  | 1093 | 2500 | 0.563 |
| 765034022 | -4469.483  | 666.214  | 167.042  | -4554.957  | 585  | 2500 | 0.766 | -4547.140  | 607  | 2500 | 0.757 |
| 765074482 | -6866.157  | 485.955  | 2156.081 | -8185.652  | 0    | 2500 | 1.000 | -6793.454  | 1851 | 2500 | 0.260 |
| 765094712 | -25051.296 | 1291.470 | 1713.916 | -29144.634 | 0    | 2500 | 1.000 | -24981.586 | 1530 | 2500 | 0.388 |
| 765135172 | -4729.347  | 462.125  | 1240.223 | -5079.471  | 20   | 2500 | 0.992 | -4463.160  | 2482 | 2500 | 0.007 |
| 765155402 | -16303.817 | 2227.539 | 342.495  | -16321.552 | 1174 | 2500 | 0.530 | -16555.642 | 320  | 2500 | 0.872 |
| 765195863 | -10787.951 | 773.403  | 1296.697 | -12133.092 | 0    | 2500 | 1.000 | -10529.902 | 2335 | 2500 | 0.066 |
| 765216093 | -11587.053 | 869.361  | 820.824  | -13437.642 | 0    | 2500 | 1.000 | -11639.510 | 987  | 2500 | 0.605 |
| 765256553 | -2908.821  | 458.029  | 111.421  | -3049.651  | 363  | 2500 | 0.855 | -3101.123  | 105  | 2500 | 0.958 |
| 765276783 | -11804.388 | 834.080  | 922.207  | -14141.122 | 0    | 2500 | 1.000 | -12089.725 | 138  | 2500 | 0.945 |
| 765317243 | -4307.671  | 562.752  | 407.317  | -4829.402  | 1    | 2500 | 1.000 | -4498.107  | 167  | 2500 | 0.933 |
| 765337473 | -11831.195 | 734.551  | 2244.245 | -13937.611 | 0    | 2500 | 1.000 | -11693.856 | 2015 | 2500 | 0.194 |
| 765377934 | -15432.448 | 1053.525 | 1657.041 | -17624.471 | 0    | 2500 | 1.000 | -15223.985 | 2109 | 2500 | 0.156 |
| 765398164 | -4687.293  | 728.674  | 234.497  | -4682.253  | 1287 | 2500 | 0.485 | -4769.107  | 639  | 2500 | 0.744 |
| 765519544 | -12036.450 | 667.678  | 2499.293 | -14380.031 | 0    | 2500 | 1.000 | -11996.478 | 1513 | 2500 | 0.395 |
| 765539774 | -7273.177  | 1218.710 | 237.910  | -7154.431  | 1904 | 2500 | 0.238 | -7385.910  | 588  | 2500 | 0.765 |
| 765560005 | -21025.501 | 1399.441 | 702.412  | -24335.773 | 0    | 2500 | 1.000 | -21629.443 | 33   | 2500 | 0.987 |
| 765620695 | -3935.003  | 1736.961 | 97.399   | -3731.699  | 2257 | 2500 | 0.097 | -3893.153  | 1528 | 2500 | 0.389 |
| 765640925 | -6139.936  | 564.094  | 3294.446 | -6908.787  | 0    | 2500 | 1.000 | -6040.786  | 2041 | 2500 | 0.184 |



|              |            |          |          |            |      |             |       |            |      |             |       |
|--------------|------------|----------|----------|------------|------|-------------|-------|------------|------|-------------|-------|
| 765661155    | -4943.845  | 598.035  | 553.157  | -5650.425  | 0    | 2500        | 1.000 | -5128.814  | 159  | 2500        | 0.936 |
| 765701615    | -14337.057 | 831.027  | 1850.574 | -17306.163 | 0    | 2500        | 1.000 | -14375.918 | 1047 | 2500        | 0.581 |
| 809635352    | -25201.870 | 2489.273 | 1106.951 | -26285.310 | 1    | 2500        | 1.000 | -25656.035 | 110  | 2500        | 0.956 |
| 823052294    | -7274.195  | 827.923  | 1416.260 | -7472.839  | 258  | 2500        | 0.897 | -6941.690  | 2489 | 2500        | 0.004 |
| 857980665    | -8857.268  | 911.650  | 767.090  | -9640.554  | 0    | 2500        | 1.000 | -8930.071  | 826  | 2500        | 0.670 |
| 861967750    | -11682.510 | 1487.437 | 375.029  | -12029.517 | 132  | 2500        | 0.947 | -11929.118 | 255  | 2500        | 0.898 |
| 863126187    | -10636.054 | 1237.628 | 717.713  | -11504.051 | 0    | 2500        | 1.000 | -10878.327 | 227  | 2500        | 0.909 |
| 875002022    | -2877.205  | 817.475  | 169.219  | -2594.960  | 2496 | 2500        | 0.002 | -2730.332  | 2348 | 2500        | 0.061 |
| 892969023    | -11519.247 | 1316.999 | 537.369  | -12510.517 | 0    | 2500        | 1.000 | -11957.097 | 15   | 2500        | 0.994 |
| 953045535    | -6465.513  | 589.910  | 514.806  | -7383.993  | 0    | 2500        | 1.000 | -6544.704  | 688  | 2500        | 0.725 |
| 970836795    | -9271.413  | 1424.870 | 634.967  | -9183.675  | 1682 | 2500        | 0.327 | -9201.245  | 1677 | 2500        | 0.329 |
| Passing Rate |            |          |          |            |      | 130 (81.2%) |       |            |      | 133 (83.6%) |       |

\*, \*\* See the bottom notes of Table S3 for the interpretations of the table columns here.

**Table S5.** Test results of fitting MSN (multi-site neutral) model to HMP-vaginal datasets ( $Sites \geq 2$ , Subjects=72)

| ID        | $L_O$      | $\theta$ | $M$ -value | Metacommunity |         |      |          | Local community |         |      |          |
|-----------|------------|----------|------------|---------------|---------|------|----------|-----------------|---------|------|----------|
|           |            |          |            | $L_M$         | $\#N_M$ | $N$  | ** $P_M$ | $L_L$           | $\#N_L$ | $N$  | ** $P_L$ |
| 158013734 | -1302.297  | 42.908   | 683.228    | -1483.849     | 171     | 2500 | 0.932    | -1295.027       | 1406    | 2500 | 0.438    |
| 158114885 | -1340.522  | 42.919   | 306.473    | -1661.194     | 22      | 2500 | 0.991    | -1425.677       | 107     | 2500 | 0.957    |
| 158236265 | -3236.625  | 176.229  | 279.927    | -4162.524     | 0       | 2500 | 1.000    | -3524.520       | 3       | 2500 | 0.999    |
| 158276726 | -2317.813  | 123.150  | 654.893    | -2796.953     | 0       | 2500 | 1.000    | -2333.502       | 1018    | 2500 | 0.593    |
| 158458797 | -6698.868  | 198.524  | 251.763    | -7987.049     | 0       | 2500 | 1.000    | -6957.434       | 91      | 2500 | 0.964    |
| 158742018 | -7768.221  | 194.791  | 133.060    | -8505.358     | 35      | 2500 | 0.986    | -8229.358       | 3       | 2500 | 0.999    |
| 158883629 | -6265.344  | 155.898  | 144.879    | -8678.790     | 0       | 2500 | 1.000    | -7008.514       | 0       | 2500 | 1.000    |
| 158944319 | -3232.284  | 164.511  | 180.333    | -4256.236     | 0       | 2500 | 1.000    | -3643.200       | 0       | 2500 | 1.000    |
| 158984779 | -3498.532  | 160.680  | 341.072    | -4502.028     | 0       | 2500 | 1.000    | -3803.717       | 3       | 2500 | 0.999    |
| 159005010 | -7913.095  | 584.602  | 387.301    | -9169.816     | 0       | 2500 | 1.000    | -8540.991       | 0       | 2500 | 1.000    |
| 159025240 | -3182.880  | 131.524  | 291.829    | -3978.037     | 0       | 2500 | 1.000    | -3449.992       | 7       | 2500 | 0.997    |
| 159085930 | -6022.655  | 250.914  | 300.975    | -7290.551     | 0       | 2500 | 1.000    | -6669.464       | 0       | 2500 | 1.000    |
| 159227541 | -5265.125  | 233.875  | 54.966     | -6010.197     | 1       | 2500 | 1.000    | -5855.320       | 1       | 2500 | 1.000    |
| 159247771 | -2165.938  | 83.046   | 360.597    | -2943.680     | 0       | 2500 | 1.000    | -2332.232       | 40      | 2500 | 0.984    |
| 159470302 | -5532.497  | 242.339  | 624.644    | -7272.814     | 0       | 2500 | 1.000    | -5979.443       | 0       | 2500 | 1.000    |
| 159713063 | -3320.534  | 138.636  | 223.783    | -4328.382     | 0       | 2500 | 1.000    | -3680.435       | 1       | 2500 | 1.000    |
| 159733294 | -4442.737  | 201.243  | 450.498    | -5721.871     | 0       | 2500 | 1.000    | -4744.457       | 15      | 2500 | 0.994    |
| 160744799 | -2009.528  | 84.337   | 697.272    | -2256.725     | 90      | 2500 | 0.964    | -1888.881       | 2428    | 2500 | 0.029    |
| 160866180 | -6563.704  | 183.157  | 865.200    | -7485.075     | 3       | 2500 | 0.999    | -6646.638       | 614     | 2500 | 0.754    |
| 161007791 | -3339.215  | 236.041  | 651.998    | -3579.030     | 111     | 2500 | 0.956    | -3303.688       | 1662    | 2500 | 0.335    |
| 161473083 | -2279.900  | 133.872  | 239.288    | -2673.097     | 3       | 2500 | 0.999    | -2321.985       | 770     | 2500 | 0.692    |
| 178713055 | -1403.374  | 1010.353 | 28.472     | -1275.504     | 2251    | 2500 | 0.100    | -1324.747       | 1989    | 2500 | 0.204    |
| 208027353 | -1428.269  | 71.699   | 731.253    | -1746.632     | 6       | 2500 | 0.998    | -1449.851       | 837     | 2500 | 0.665    |
| 246515023 | -1693.488  | 69.721   | 1661.087   | -1853.194     | 226     | 2500 | 0.910    | -1733.806       | 473     | 2500 | 0.811    |
| 256789458 | -2049.638  | 1544.165 | 45.299     | -1855.302     | 2383    | 2498 | 0.046    | -1921.186       | 2171    | 2498 | 0.131    |
| 370425937 | -2117.736  | 95.130   | 261.821    | -2488.695     | 6       | 2500 | 0.998    | -2127.888       | 1100    | 2500 | 0.560    |
| 375450439 | -8966.493  | 422.390  | 156.636    | -10061.476    | 0       | 2500 | 1.000    | -9675.056       | 1       | 2500 | 1.000    |
| 414519462 | -1407.421  | 52.269   | 536.644    | -1939.566     | 0       | 2500 | 1.000    | -1477.990       | 246     | 2500 | 0.902    |
| 451588811 | -5052.341  | 547.531  | 194.843    | -5972.189     | 0       | 2500 | 1.000    | -5547.559       | 1       | 2500 | 1.000    |
| 465578759 | -2396.537  | 105.898  | 319.291    | -3304.635     | 0       | 2500 | 1.000    | -2559.802       | 58      | 2500 | 0.977    |
| 508703490 | -1500.691  | 81.078   | 376.521    | -1874.978     | 0       | 2499 | 1.000    | -1529.438       | 742     | 2499 | 0.703    |
| 553359145 | -1648.083  | 57.113   | 289.205    | -2184.000     | 2       | 2500 | 0.999    | -1777.219       | 50      | 2500 | 0.980    |
| 561079058 | -1665.620  | 135.349  | 153.860    | -2142.376     | 0       | 2500 | 1.000    | -1840.335       | 21      | 2500 | 0.992    |
| 612472597 | -3460.046  | 179.012  | 294.283    | -4517.102     | 0       | 2500 | 1.000    | -3788.362       | 1       | 2500 | 1.000    |
| 638754422 | -3682.903  | 196.571  | 1362.837   | -4462.811     | 0       | 2500 | 1.000    | -3685.726       | 1216    | 2500 | 0.514    |
| 650853796 | -1488.709  | 112.032  | 132.943    | -1742.941     | 18      | 2500 | 0.993    | -1538.533       | 633     | 2500 | 0.747    |
| 663835652 | -3804.059  | 192.146  | 377.227    | -4522.954     | 0       | 2500 | 1.000    | -4068.753       | 6       | 2500 | 0.998    |
| 682449369 | -2399.612  | 75.573   | 1635.972   | -2731.022     | 54      | 2500 | 0.978    | -2410.184       | 1084    | 2500 | 0.566    |
| 737052003 | -3685.846  | 157.891  | 359.562    | -4640.780     | 0       | 2500 | 1.000    | -4003.749       | 4       | 2500 | 0.998    |
| 739574095 | -3467.686  | 292.117  | 271.901    | -4368.244     | 0       | 2500 | 1.000    | -3822.146       | 2       | 2500 | 0.999    |
| 763456073 | -2592.063  | 177.130  | 122.770    | -3177.659     | 0       | 2500 | 1.000    | -2799.940       | 68      | 2500 | 0.973    |
| 763557224 | -2665.182  | 144.948  | 174.905    | -3597.990     | 0       | 2500 | 1.000    | -3011.367       | 0       | 2500 | 1.000    |
| 763638144 | -4060.931  | 147.263  | 113.055    | -4488.276     | 45      | 2500 | 0.982    | -4330.448       | 20      | 2500 | 0.992    |
| 763698834 | -10101.448 | 317.995  | 238.786    | -14323.194    | 0       | 2500 | 1.000    | -11819.109      | 0       | 2500 | 1.000    |
| 763719065 | -6105.430  | 214.676  | 983.737    | -6877.639     | 3       | 2500 | 0.999    | -6230.008       | 403     | 2500 | 0.839    |
| 763759525 | -9137.422  | 287.241  | 302.413    | -11895.915    | 0       | 2500 | 1.000    | -10028.610      | 0       | 2500 | 1.000    |
| 763820215 | -4443.036  | 102.140  | 247.015    | -6416.459     | 0       | 2500 | 1.000    | -4801.372       | 3       | 2500 | 0.999    |

|              |           |         |          |           |     |           |       |           |           |      |       |
|--------------|-----------|---------|----------|-----------|-----|-----------|-------|-----------|-----------|------|-------|
| 763840445    | -5200.155 | 119.159 | 171.844  | -6730.041 | 0   | 2500      | 1.000 | -5570.708 | 11        | 2500 | 0.996 |
| 763901136    | -7491.033 | 234.625 | 621.668  | -8432.862 | 2   | 2500      | 0.999 | -7662.805 | 296       | 2500 | 0.882 |
| 763921366    | -2649.873 | 137.523 | 162.161  | -3556.149 | 0   | 2500      | 1.000 | -2986.336 | 0         | 2500 | 1.000 |
| 764042746    | -5766.102 | 142.380 | 772.132  | -6421.693 | 21  | 2500      | 0.992 | -5749.925 | 1381      | 2500 | 0.448 |
| 764062976    | -4090.741 | 103.929 | 195.858  | -5693.570 | 0   | 2500      | 1.000 | -4427.871 | 2         | 2500 | 0.999 |
| 764143897    | -7447.356 | 147.415 | 763.064  | -9952.291 | 0   | 2500      | 1.000 | -7723.818 | 58        | 2500 | 0.977 |
| 764184357    | -7255.100 | 168.594 | 488.279  | -9593.773 | 0   | 2500      | 1.000 | -7520.565 | 99        | 2500 | 0.960 |
| 764245047    | -2322.955 | 110.590 | 176.716  | -3208.985 | 0   | 2500      | 1.000 | -2626.291 | 2         | 2500 | 0.999 |
| 764346198    | -7466.850 | 272.612 | 459.222  | -8987.287 | 0   | 2500      | 1.000 | -7830.180 | 25        | 2500 | 0.990 |
| 764366428    | -2221.938 | 88.888  | 354.721  | -2954.930 | 0   | 2500      | 1.000 | -2273.535 | 655       | 2500 | 0.738 |
| 764467579    | -6733.235 | 363.113 | 249.255  | -8407.611 | 0   | 2500      | 1.000 | -7432.303 | 0         | 2500 | 1.000 |
| 764588959    | -1152.735 | 49.222  | 643.255  | -1364.673 | 57  | 2500      | 0.977 | -1180.918 | 675       | 2500 | 0.730 |
| 764649650    | -2932.899 | 174.598 | 271.755  | -3770.417 | 0   | 2500      | 1.000 | -3190.579 | 4         | 2500 | 0.998 |
| 764710340    | -1445.355 | 47.990  | 540.710  | -1932.207 | 0   | 2500      | 1.000 | -1529.987 | 125       | 2500 | 0.950 |
| 764811490    | -4535.511 | 198.551 | 775.217  | -5757.163 | 0   | 2500      | 1.000 | -4796.947 | 11        | 2500 | 0.996 |
| 765013792    | -2670.199 | 151.778 | 229.888  | -3495.489 | 0   | 2500      | 1.000 | -2883.128 | 29        | 2500 | 0.988 |
| 765034022    | -1259.659 | 68.790  | 452.352  | -1530.977 | 10  | 2500      | 0.996 | -1272.523 | 995       | 2500 | 0.602 |
| 765195863    | -3018.943 | 154.341 | 281.737  | -3862.284 | 0   | 2500      | 1.000 | -3259.119 | 19        | 2500 | 0.992 |
| 765256553    | -3288.519 | 161.084 | 527.652  | -4224.186 | 0   | 2500      | 1.000 | -3484.173 | 50        | 2500 | 0.980 |
| 765317243    | -2697.870 | 129.495 | 248.665  | -3525.338 | 0   | 2500      | 1.000 | -2956.778 | 5         | 2500 | 0.998 |
| 765337473    | -934.443  | 40.394  | 120.691  | -1353.763 | 0   | 2500      | 1.000 | -1030.000 | 84        | 2500 | 0.966 |
| 809635352    | -3108.150 | 133.680 | 211.488  | -3750.174 | 0   | 2500      | 1.000 | -3247.170 | 212       | 2500 | 0.915 |
| 892969023    | -3675.875 | 267.018 | 1344.946 | -3913.415 | 113 | 2500      | 0.955 | -3596.724 | 2110      | 2500 | 0.156 |
| 953045535    | -2148.504 | 142.710 | 304.242  | -2608.821 | 1   | 2500      | 1.000 | -2267.962 | 157       | 2500 | 0.937 |
| 970836795    | -2040.229 | 127.583 | 177.706  | -2366.985 | 10  | 2496      | 0.996 | -2155.684 | 151       | 2496 | 0.940 |
| Passing Rate |           |         |          |           |     | 71(98.6%) |       |           | 71(98.6%) |      |       |

\*, \*\* See the bottom notes of Table S3 for the interpretations of the table columns here.

**Table S6.** Test results of fitting MSN (multi-site neutral) model to HMP-whole datasets ( $Sites \geq 5$ , Subjects=172)

| ID        | $L_O$       | $\theta$ | $M$ -value | <i>Metacommunity</i> |         |      |          | <i>Local community</i> |         |      |          |
|-----------|-------------|----------|------------|----------------------|---------|------|----------|------------------------|---------|------|----------|
|           |             |          |            | $L_M$                | $\#N_M$ | $N$  | ** $P_M$ | $L_L$                  | $\#N_L$ | $N$  | ** $P_L$ |
| 103092734 | -2802.896   | 1147.772 | 122.128    | -2507.942            | 2492    | 2500 | 0.003    | -2649.043              | 2315    | 2500 | 0.074    |
| 132902142 | -38065.916  | 3559.293 | 370.025    | -38355.535           | 600     | 2500 | 0.760    | -38935.805             | 25      | 2500 | 0.990    |
| 147406386 | -64235.930  | 4906.266 | 292.447    | -65074.044           | 188     | 2500 | 0.925    | -66558.734             | 0       | 2500 | 1.000    |
| 158013734 | -56921.895  | 3961.098 | 315.871    | -57466.786           | 412     | 2500 | 0.835    | -58225.131             | 9       | 2500 | 0.996    |
| 158114885 | -69376.790  | 3861.186 | 433.830    | -71913.604           | 0       | 2500 | 1.000    | -71454.240             | 0       | 2500 | 1.000    |
| 158155345 | -61013.399  | 3866.351 | 339.302    | -62350.821           | 22      | 2500 | 0.991    | -63220.119             | 0       | 2500 | 1.000    |
| 158216035 | -69227.089  | 4256.415 | 427.091    | -72466.739           | 0       | 2500 | 1.000    | -72169.707             | 0       | 2500 | 1.000    |
| 158236265 | -62957.327  | 4431.729 | 328.197    | -64841.970           | 4       | 2500 | 0.998    | -65476.007             | 0       | 2500 | 1.000    |
| 158276726 | -63975.442  | 4400.848 | 235.320    | -65622.738           | 5       | 2500 | 0.998    | -66699.871             | 0       | 2500 | 1.000    |
| 158398106 | -111968.178 | 4588.817 | 335.041    | -119327.494          | 0       | 2500 | 1.000    | -117581.943            | 0       | 2500 | 1.000    |
| 158418336 | -137549.941 | 5865.038 | 475.245    | -144342.927          | 0       | 2500 | 1.000    | -143084.504            | 0       | 2500 | 1.000    |
| 158438567 | -129074.135 | 4943.400 | 390.403    | -137760.314          | 0       | 2500 | 1.000    | -135798.765            | 0       | 2500 | 1.000    |
| 158458797 | -133304.453 | 5548.476 | 286.065    | -138962.394          | 0       | 2500 | 1.000    | -139324.180            | 0       | 2500 | 1.000    |
| 158479027 | -64569.173  | 5110.481 | 483.657    | -65178.763           | 322     | 2500 | 0.871    | -65718.172             | 18      | 2500 | 0.993    |
| 158499257 | -49143.880  | 4640.143 | 354.491    | -49670.305           | 355     | 2500 | 0.858    | -50314.259             | 3       | 2500 | 0.999    |
| 158721788 | -60573.677  | 5151.838 | 391.469    | -61780.709           | 33      | 2500 | 0.987    | -62466.191             | 1       | 2500 | 1.000    |
| 158742018 | -148356.744 | 5791.396 | 365.149    | -153821.922          | 0       | 2500 | 1.000    | -154182.025            | 0       | 2500 | 1.000    |
| 158802708 | -92934.873  | 7038.117 | 454.133    | -94650.771           | 23      | 2500 | 0.991    | -96133.397             | 0       | 2500 | 1.000    |
| 158822939 | -133898.400 | 7288.545 | 737.928    | -138203.162          | 0       | 2500 | 1.000    | -140386.496            | 0       | 2500 | 1.000    |
| 158883629 | -150999.547 | 4977.649 | 339.400    | -159912.773          | 0       | 2500 | 1.000    | -160187.658            | 0       | 2500 | 1.000    |
| 158924089 | -132288.899 | 8078.679 | 655.127    | -136208.777          | 0       | 2500 | 1.000    | -138482.311            | 0       | 2500 | 1.000    |
| 158944319 | -79047.792  | 6220.612 | 352.028    | -81243.747           | 2       | 2500 | 1.000    | -82538.374             | 0       | 2500 | 1.000    |
| 158964549 | -166885.452 | 5803.914 | 410.292    | -178243.500          | 0       | 2500 | 1.000    | -175949.183            | 0       | 2500 | 1.000    |
| 158984779 | -51908.200  | 5571.336 | 234.776    | -51493.223           | 1925    | 2500 | 0.230    | -53031.061             | 49      | 2500 | 0.980    |
| 159005010 | -104996.955 | 6135.541 | 468.697    | -109520.515          | 0       | 2500 | 1.000    | -109922.267            | 0       | 2500 | 1.000    |
| 159025240 | -63806.525  | 3829.799 | 346.890    | -68285.291           | 0       | 2500 | 1.000    | -66845.899             | 0       | 2500 | 1.000    |
| 159085930 | -110693.361 | 7641.466 | 404.650    | -112989.188          | 8       | 2500 | 0.997    | -115193.247            | 0       | 2500 | 1.000    |
| 159146620 | -181361.662 | 5867.754 | 519.312    | -198873.162          | 0       | 2500 | 1.000    | -192821.268            | 0       | 2500 | 1.000    |
| 159166850 | -246683.950 | 6791.554 | 583.939    | -260383.071          | 0       | 2500 | 1.000    | -263137.709            | 0       | 2500 | 1.000    |
| 159227541 | -150966.757 | 5099.439 | 436.421    | -160946.613          | 0       | 2500 | 1.000    | -158434.007            | 0       | 2500 | 1.000    |
| 159247771 | -77638.165  | 4924.496 | 374.144    | -80758.990           | 0       | 2500 | 1.000    | -80777.636             | 0       | 2500 | 1.000    |
| 159389382 | -128859.539 | 5258.571 | 411.029    | -135380.878          | 0       | 2500 | 1.000    | -134643.025            | 0       | 2500 | 1.000    |
| 159470302 | -140635.251 | 7108.914 | 548.218    | -152318.311          | 0       | 2500 | 1.000    | -150717.397            | 0       | 2500 | 1.000    |
| 159713063 | -135683.219 | 7227.879 | 476.745    | -141125.445          | 0       | 2500 | 1.000    | -143691.688            | 0       | 2500 | 1.000    |
| 159733294 | -127916.425 | 6918.788 | 498.363    | -135237.482          | 0       | 2500 | 1.000    | -135533.777            | 0       | 2500 | 1.000    |
| 160744799 | -30475.562  | 2502.538 | 230.362    | -31270.134           | 53      | 2499 | 0.979    | -31280.402             | 21      | 2499 | 0.992    |
| 160825720 | -85634.992  | 5260.301 | 401.332    | -84518.152           | 2427    | 2496 | 0.028    | -85990.193             | 602     | 2496 | 0.759    |
| 160866180 | -78466.641  | 5015.270 | 257.286    | -77975.399           | 2028    | 2500 | 0.189    | -79423.282             | 112     | 2500 | 0.955    |
| 160886410 | -40206.154  | 3974.115 | 345.299    | -39276.226           | 2479    | 2500 | 0.008    | -40272.892             | 1077    | 2500 | 0.569    |
| 160906640 | -46135.594  | 4557.317 | 419.690    | -45839.934           | 1881    | 2500 | 0.248    | -46448.847             | 494     | 2500 | 0.802    |
| 160947100 | -90727.056  | 5196.394 | 488.723    | -91321.874           | 413     | 2498 | 0.835    | -91452.365             | 173     | 2498 | 0.931    |
| 160967330 | -45658.062  | 4349.304 | 412.424    | -43845.880           | 2500    | 2500 | 0.000    | -45165.488             | 2291    | 2500 | 0.084    |
| 160987560 | -44353.674  | 4704.254 | 507.614    | -42275.115           | 2500    | 2500 | 0.000    | -43653.542             | 2462    | 2500 | 0.015    |
| 161007791 | -42908.976  | 3769.858 | 333.667    | -41821.949           | 2486    | 2500 | 0.006    | -42887.227             | 1307    | 2500 | 0.477    |
| 161270782 | -44965.779  | 5788.948 | 370.538    | -42302.170           | 2496    | 2497 | 0.000    | -43884.916             | 2492    | 2497 | 0.002    |
| 161311242 | -37053.833  | 4287.248 | 409.961    | -35060.833           | 2500    | 2500 | 0.000    | -36366.133             | 2469    | 2500 | 0.012    |
| 161331472 | -11287.555  | 4571.672 | 328.843    | -9588.195            | 2500    | 2500 | 0.000    | -10135.824             | 2500    | 2500 | 0.000    |

|           |             |          |         |             |      |      |       |             |      |      |       |
|-----------|-------------|----------|---------|-------------|------|------|-------|-------------|------|------|-------|
| 161351702 | -8731.369   | 3850.748 | 443.719 | -7173.746   | 2500 | 2500 | 0.000 | -7672.465   | 2500 | 2500 | 0.000 |
| 161412393 | -29465.842  | 3118.651 | 478.994 | -29842.246  | 362  | 2500 | 0.855 | -29997.803  | 94   | 2500 | 0.962 |
| 161473083 | -48853.132  | 5561.309 | 217.569 | -47517.933  | 2492 | 2500 | 0.003 | -48959.607  | 1024 | 2500 | 0.590 |
| 161554003 | -40723.769  | 3469.835 | 273.241 | -40916.725  | 801  | 2500 | 0.680 | -41694.892  | 10   | 2500 | 0.996 |
| 178713055 | -43727.432  | 4204.176 | 249.628 | -44110.360  | 548  | 2499 | 0.781 | -44925.711  | 4    | 2499 | 0.998 |
| 184349034 | -36519.128  | 7099.860 | 319.325 | -34765.011  | 2500 | 2500 | 0.000 | -36136.941  | 2090 | 2500 | 0.164 |
| 208027353 | -67635.551  | 4650.735 | 351.503 | -68798.123  | 60   | 2500 | 0.976 | -69574.574  | 0    | 2500 | 1.000 |
| 246515023 | -43927.337  | 4084.862 | 393.402 | -42592.755  | 2499 | 2500 | 0.000 | -43755.629  | 1679 | 2500 | 0.328 |
| 256789458 | -32556.642  | 5685.051 | 232.413 | -31373.192  | 2494 | 2498 | 0.002 | -32577.512  | 1193 | 2498 | 0.522 |
| 275382046 | -22630.954  | 4934.000 | 211.065 | -21470.087  | 2497 | 2500 | 0.001 | -22382.471  | 1924 | 2500 | 0.230 |
| 289996019 | -101213.721 | 4043.641 | 306.756 | -107313.527 | 0    | 2500 | 1.000 | -107232.553 | 0    | 2500 | 1.000 |
| 295137534 | -32094.664  | 4327.608 | 245.921 | -30529.873  | 2500 | 2500 | 0.000 | -31625.609  | 2279 | 2500 | 0.088 |
| 336497421 | -49526.861  | 4803.265 | 380.720 | -48600.642  | 2456 | 2500 | 0.018 | -49838.522  | 537  | 2500 | 0.785 |
| 338793263 | -10942.637  | 1824.286 | 260.056 | -11059.199  | 772  | 2500 | 0.691 | -11230.772  | 273  | 2500 | 0.891 |
| 355657046 | -16230.004  | 2605.727 | 391.248 | -15764.754  | 2408 | 2500 | 0.037 | -16291.568  | 967  | 2500 | 0.613 |
| 368533040 | -46785.829  | 3857.425 | 378.521 | -46135.226  | 2323 | 2500 | 0.071 | -47104.479  | 515  | 2500 | 0.794 |
| 370027359 | -62466.274  | 4952.765 | 303.374 | -62615.940  | 1000 | 2500 | 0.600 | -64270.076  | 1    | 2500 | 1.000 |
| 370425937 | -65649.558  | 3981.281 | 258.597 | -67296.029  | 2    | 2500 | 1.000 | -67931.269  | 0    | 2500 | 1.000 |
| 375450439 | -118249.041 | 4911.966 | 359.786 | -124432.032 | 0    | 2500 | 1.000 | -123236.357 | 0    | 2500 | 1.000 |
| 404239096 | -56209.528  | 5219.827 | 370.455 | -55598.779  | 2233 | 2500 | 0.107 | -56903.128  | 161  | 2500 | 0.936 |
| 414519462 | -66769.089  | 5066.222 | 295.080 | -67856.164  | 85   | 2500 | 0.966 | -68999.387  | 0    | 2500 | 1.000 |
| 451588811 | -53061.005  | 5768.368 | 314.410 | -52236.677  | 2377 | 2500 | 0.049 | -53955.294  | 58   | 2500 | 0.977 |
| 465578759 | -63774.256  | 5323.203 | 222.482 | -65610.899  | 3    | 2500 | 0.999 | -66860.787  | 0    | 2500 | 1.000 |
| 492786515 | -46918.000  | 3973.512 | 246.555 | -47535.462  | 248  | 2500 | 0.901 | -48389.616  | 1    | 2500 | 1.000 |
| 508703490 | -40148.466  | 3592.284 | 195.346 | -40218.394  | 1081 | 2500 | 0.568 | -41221.437  | 13   | 2500 | 0.995 |
| 514014184 | -5676.375   | 4655.542 | 214.537 | -4734.582   | 2500 | 2500 | 0.000 | -4942.818   | 2500 | 2500 | 0.000 |
| 516889361 | -31593.672  | 9500.009 | 311.070 | -29180.016  | 2500 | 2500 | 0.000 | -30379.113  | 2499 | 2500 | 0.000 |
| 517810313 | -64156.773  | 4080.032 | 326.507 | -66196.860  | 0    | 2500 | 1.000 | -66875.023  | 0    | 2500 | 1.000 |
| 550534656 | -14418.532  | 1900.497 | 338.457 | -15054.421  | 19   | 2500 | 0.992 | -14967.010  | 16   | 2500 | 0.994 |
| 553359145 | -63025.846  | 4841.546 | 252.634 | -63652.900  | 347  | 2500 | 0.861 | -65205.799  | 0    | 2500 | 1.000 |
| 561079058 | -7484.100   | 2952.811 | 123.537 | -7105.924   | 2389 | 2500 | 0.044 | -7398.863   | 1623 | 2500 | 0.351 |
| 604812005 | -33950.019  | 4435.734 | 411.985 | -31799.551  | 2500 | 2500 | 0.000 | -32918.625  | 2499 | 2500 | 0.000 |
| 612472597 | -86269.739  | 6613.476 | 362.351 | -87190.839  | 264  | 2500 | 0.894 | -88352.322  | 3    | 2500 | 0.999 |
| 638754422 | -54888.972  | 5913.333 | 292.298 | -53385.460  | 2496 | 2500 | 0.002 | -55179.071  | 675  | 2500 | 0.730 |
| 643185023 | -34626.267  | 4963.173 | 188.741 | -34008.228  | 2307 | 2496 | 0.076 | -35073.982  | 345  | 2496 | 0.862 |
| 650853796 | -48233.805  | 5689.093 | 322.374 | -47296.678  | 2438 | 2500 | 0.025 | -48550.530  | 572  | 2500 | 0.771 |
| 658594300 | -18762.503  | 3269.391 | 191.659 | -18144.054  | 2452 | 2500 | 0.019 | -18795.546  | 1124 | 2500 | 0.550 |
| 663835652 | -55789.060  | 4708.026 | 329.731 | -56935.634  | 32   | 2500 | 0.987 | -57568.156  | 0    | 2500 | 1.000 |
| 668248235 | -73125.878  | 5332.918 | 344.053 | -74205.504  | 99   | 2500 | 0.960 | -75695.150  | 0    | 2500 | 1.000 |
| 675950834 | -16654.664  | 4942.781 | 331.591 | -15018.435  | 2500 | 2500 | 0.000 | -15791.131  | 2499 | 2500 | 0.000 |
| 682102541 | -19329.785  | 4253.551 | 207.005 | -19010.878  | 2074 | 2500 | 0.170 | -19721.189  | 259  | 2500 | 0.896 |
| 682449369 | -64313.159  | 3774.025 | 354.786 | -65104.396  | 203  | 2500 | 0.919 | -66001.731  | 0    | 2500 | 1.000 |
| 686765762 | -98543.786  | 5223.220 | 343.220 | -99686.453  | 120  | 2500 | 0.952 | -100891.723 | 0    | 2500 | 1.000 |
| 706846339 | -25284.463  | 7913.746 | 309.791 | -23263.015  | 2500 | 2500 | 0.000 | -24277.876  | 2495 | 2500 | 0.002 |
| 737052003 | -74465.495  | 5238.773 | 285.792 | -76876.727  | 0    | 2500 | 1.000 | -77921.892  | 0    | 2500 | 1.000 |
| 739574095 | -15954.499  | 2827.819 | 127.295 | -16173.207  | 631  | 2500 | 0.748 | -16759.271  | 8    | 2500 | 0.997 |
| 763395383 | -69124.253  | 4835.659 | 424.348 | -70720.956  | 9    | 2500 | 0.996 | -71346.094  | 0    | 2500 | 1.000 |
| 763435843 | -73166.731  | 5276.904 | 376.370 | -75282.583  | 0    | 2498 | 1.000 | -76257.706  | 0    | 2498 | 1.000 |
| 763456073 | -59812.211  | 3548.038 | 318.717 | -62420.161  | 0    | 2500 | 1.000 | -62170.529  | 0    | 2500 | 1.000 |
| 763476303 | -49008.171  | 4614.024 | 224.827 | -49629.428  | 298  | 2500 | 0.881 | -50868.207  | 0    | 2500 | 1.000 |
| 763516763 | -96859.532  | 5143.585 | 257.024 | -100635.541 | 0    | 2500 | 1.000 | -101327.566 | 0    | 2500 | 1.000 |

|           |             |          |          |             |      |      |       |             |      |      |       |
|-----------|-------------|----------|----------|-------------|------|------|-------|-------------|------|------|-------|
| 763536994 | -195412.579 | 5964.464 | 362.468  | -208852.061 | 0    | 2500 | 1.000 | -207068.489 | 0    | 2500 | 1.000 |
| 763557224 | -36154.040  | 3248.713 | 176.365  | -36813.719  | 198  | 2500 | 0.921 | -37587.942  | 0    | 2500 | 1.000 |
| 763597684 | -201279.291 | 6863.464 | 535.301  | -215779.390 | 0    | 2500 | 1.000 | -214280.842 | 0    | 2500 | 1.000 |
| 763638144 | -92656.142  | 4522.619 | 306.620  | -95845.469  | 0    | 2500 | 1.000 | -95934.316  | 0    | 2500 | 1.000 |
| 763678604 | -23417.894  | 1219.138 | 449.452  | -29274.734  | 0    | 2500 | 1.000 | -25493.672  | 0    | 2500 | 1.000 |
| 763698834 | -198271.787 | 6547.461 | 341.459  | -209683.826 | 0    | 2500 | 1.000 | -213045.539 | 0    | 2500 | 1.000 |
| 763719065 | -86098.522  | 3644.971 | 231.988  | -88953.756  | 0    | 2500 | 1.000 | -89275.721  | 0    | 2500 | 1.000 |
| 763759525 | -129191.795 | 6150.275 | 267.835  | -133891.259 | 0    | 2500 | 1.000 | -135484.524 | 0    | 2500 | 1.000 |
| 763820215 | -81574.881  | 3704.069 | 200.298  | -87229.701  | 0    | 2500 | 1.000 | -86715.139  | 0    | 2500 | 1.000 |
| 763840445 | -142906.564 | 5403.531 | 323.128  | -149749.361 | 0    | 2500 | 1.000 | -149425.566 | 0    | 2500 | 1.000 |
| 763860675 | -121373.894 | 5243.776 | 349.145  | -128409.731 | 0    | 2500 | 1.000 | -126976.155 | 0    | 2500 | 1.000 |
| 763880905 | -75134.674  | 4367.088 | 283.445  | -78571.615  | 0    | 2500 | 1.000 | -79817.887  | 0    | 2500 | 1.000 |
| 763901136 | -110998.993 | 5850.153 | 297.546  | -112856.259 | 19   | 2500 | 0.992 | -114540.189 | 0    | 2500 | 1.000 |
| 763921366 | -73581.503  | 5005.174 | 314.424  | -75259.977  | 14   | 2500 | 0.994 | -76530.583  | 0    | 2500 | 1.000 |
| 763982056 | -131017.817 | 5302.332 | 330.953  | -139584.668 | 0    | 2500 | 1.000 | -138582.600 | 0    | 2500 | 1.000 |
| 764002286 | -138649.116 | 5421.903 | 328.263  | -146495.002 | 0    | 2500 | 1.000 | -147744.711 | 0    | 2500 | 1.000 |
| 764042746 | -86625.726  | 4649.861 | 259.511  | -87747.859  | 141  | 2500 | 0.944 | -89185.640  | 1    | 2500 | 1.000 |
| 764062976 | -108244.747 | 4781.596 | 258.174  | -112264.475 | 0    | 2500 | 1.000 | -112874.012 | 0    | 2500 | 1.000 |
| 764083206 | -162921.341 | 5176.445 | 422.615  | -175710.872 | 0    | 2500 | 1.000 | -173020.272 | 0    | 2500 | 1.000 |
| 764143897 | -145980.002 | 4718.025 | 327.599  | -155523.831 | 0    | 2500 | 1.000 | -153877.898 | 0    | 2500 | 1.000 |
| 764184357 | -123118.900 | 4867.863 | 308.907  | -127828.636 | 0    | 2500 | 1.000 | -128141.545 | 0    | 2500 | 1.000 |
| 764224817 | -127111.172 | 5575.574 | 351.718  | -133167.877 | 0    | 2500 | 1.000 | -132796.098 | 0    | 2500 | 1.000 |
| 764245047 | -44499.839  | 3459.971 | 181.600  | -45961.504  | 11   | 2500 | 0.996 | -46639.969  | 0    | 2500 | 1.000 |
| 764285508 | -42328.881  | 2431.382 | 436.309  | -44368.260  | 0    | 2500 | 1.000 | -43917.520  | 0    | 2500 | 1.000 |
| 764305738 | -188881.032 | 6802.044 | 454.587  | -201542.409 | 0    | 2500 | 1.000 | -201022.558 | 0    | 2500 | 1.000 |
| 764325968 | -133161.919 | 6573.226 | 341.988  | -136292.821 | 0    | 2500 | 1.000 | -138074.817 | 0    | 2500 | 1.000 |
| 764346198 | -99372.608  | 5493.579 | 255.072  | -100402.913 | 215  | 2500 | 0.914 | -102378.479 | 0    | 2500 | 1.000 |
| 764366428 | -40219.653  | 3188.345 | 181.735  | -40997.768  | 141  | 2500 | 0.944 | -41895.434  | 1    | 2500 | 1.000 |
| 764447348 | -88520.364  | 5049.612 | 238.362  | -92094.458  | 0    | 2500 | 1.000 | -92361.623  | 0    | 2500 | 1.000 |
| 764467579 | -87400.557  | 4536.065 | 334.681  | -89703.086  | 0    | 2500 | 1.000 | -90427.220  | 0    | 2500 | 1.000 |
| 764487809 | -116279.529 | 5652.887 | 295.371  | -122449.014 | 0    | 2500 | 1.000 | -122157.448 | 0    | 2500 | 1.000 |
| 764508039 | -57353.763  | 5302.357 | 284.110  | -58009.374  | 300  | 2500 | 0.880 | -59100.013  | 0    | 2500 | 1.000 |
| 764588959 | -46949.519  | 3393.813 | 229.023  | -47804.697  | 125  | 2500 | 0.950 | -48454.772  | 0    | 2500 | 1.000 |
| 764649650 | -66985.592  | 5507.387 | 265.167  | -67555.812  | 425  | 2500 | 0.830 | -68946.035  | 1    | 2500 | 1.000 |
| 764669880 | -117257.588 | 4707.120 | 417.667  | -123558.474 | 0    | 2500 | 1.000 | -121982.216 | 0    | 2500 | 1.000 |
| 764710340 | -11016.876  | 2167.290 | 71.451   | -10591.345  | 2362 | 2500 | 0.055 | -10967.846  | 1444 | 2500 | 0.422 |
| 764750800 | -70837.426  | 5117.257 | 455.311  | -72902.661  | 0    | 2500 | 1.000 | -73260.962  | 0    | 2500 | 1.000 |
| 764811490 | -78875.772  | 6017.034 | 309.347  | -80005.251  | 125  | 2500 | 0.950 | -81743.024  | 0    | 2500 | 1.000 |
| 764831721 | -60449.510  | 5113.365 | 417.770  | -61677.788  | 27   | 2500 | 0.989 | -62121.341  | 0    | 2500 | 1.000 |
| 764872181 | -55622.311  | 3664.676 | 341.609  | -57720.075  | 0    | 2500 | 1.000 | -57914.282  | 0    | 2500 | 1.000 |
| 764892411 | -59415.354  | 4361.149 | 367.091  | -60279.184  | 143  | 2500 | 0.943 | -60785.985  | 1    | 2500 | 1.000 |
| 764953101 | -56181.522  | 4989.529 | 413.988  | -57194.504  | 59   | 2500 | 0.976 | -57729.393  | 0    | 2500 | 1.000 |
| 765013792 | -55636.487  | 3849.749 | 317.947  | -57254.325  | 3    | 2500 | 0.999 | -57528.785  | 0    | 2500 | 1.000 |
| 765034022 | -54871.813  | 3794.996 | 297.712  | -56151.373  | 16   | 2500 | 0.994 | -56545.665  | 0    | 2500 | 1.000 |
| 765074482 | -89036.892  | 5650.346 | 333.606  | -89894.988  | 250  | 2500 | 0.900 | -91193.818  | 0    | 2500 | 1.000 |
| 765094712 | -103141.480 | 4725.479 | 371.284  | -107684.581 | 0    | 2500 | 1.000 | -107783.179 | 0    | 2500 | 1.000 |
| 765135172 | -4729.347   | 462.125  | 1240.223 | -5079.471   | 20   | 2500 | 0.992 | -4463.160   | 2482 | 2500 | 0.007 |
| 765155402 | -63387.349  | 5002.686 | 294.641  | -63426.140  | 1188 | 2500 | 0.525 | -64739.860  | 11   | 2500 | 0.996 |
| 765195863 | -66737.889  | 5431.455 | 278.063  | -66771.605  | 1194 | 2500 | 0.522 | -68202.435  | 11   | 2500 | 0.996 |
| 765216093 | -64468.688  | 4904.974 | 324.773  | -64956.513  | 494  | 2500 | 0.802 | -66274.322  | 0    | 2500 | 1.000 |
| 765256553 | -55396.922  | 4108.259 | 359.594  | -56775.312  | 13   | 2500 | 0.995 | -57260.235  | 0    | 2500 | 1.000 |

|              |            |          |          |            |      |             |       |            |      |             |       |
|--------------|------------|----------|----------|------------|------|-------------|-------|------------|------|-------------|-------|
| 765276783    | -60086.505 | 4650.883 | 285.444  | -60884.732 | 171  | 2500        | 0.932 | -62255.246 | 0    | 2500        | 1.000 |
| 765317243    | -42952.911 | 3462.816 | 242.556  | -44533.631 | 2    | 2500        | 1.000 | -44825.660 | 0    | 2500        | 1.000 |
| 765337473    | -66258.526 | 5014.517 | 293.241  | -66538.026 | 757  | 2500        | 0.697 | -68035.844 | 0    | 2500        | 1.000 |
| 765377934    | -45350.915 | 3784.215 | 394.378  | -45713.364 | 570  | 2500        | 0.772 | -46744.238 | 0    | 2500        | 1.000 |
| 765398164    | -4687.293  | 728.674  | 234.497  | -4682.253  | 1287 | 2500        | 0.485 | -4769.107  | 639  | 2500        | 0.744 |
| 765519544    | -12036.450 | 667.678  | 2499.293 | -14380.031 | 0    | 2500        | 1.000 | -11996.478 | 1513 | 2500        | 0.395 |
| 765539774    | -7273.177  | 1218.710 | 237.910  | -7154.431  | 1904 | 2500        | 0.238 | -7385.910  | 588  | 2500        | 0.765 |
| 765560005    | -79462.204 | 4794.541 | 432.980  | -81594.764 | 1    | 2500        | 1.000 | -82473.509 | 0    | 2500        | 1.000 |
| 765620695    | -3935.003  | 1736.961 | 97.399   | -3731.699  | 2257 | 2500        | 0.097 | -3893.153  | 1528 | 2500        | 0.389 |
| 765640925    | -6139.936  | 564.094  | 3294.446 | -6908.787  | 0    | 2500        | 1.000 | -6040.786  | 2041 | 2500        | 0.184 |
| 765661155    | -4943.845  | 598.035  | 553.157  | -5650.425  | 0    | 2500        | 1.000 | -5128.814  | 159  | 2500        | 0.936 |
| 765701615    | -14337.057 | 831.027  | 1850.574 | -17306.163 | 0    | 2500        | 1.000 | -14375.918 | 1047 | 2500        | 0.581 |
| 809635352    | -71314.294 | 5439.099 | 344.016  | -71206.699 | 1432 | 2500        | 0.427 | -72839.505 | 6    | 2500        | 0.998 |
| 823052294    | -7274.195  | 827.923  | 1416.260 | -7472.839  | 258  | 2500        | 0.897 | -6941.690  | 2489 | 2500        | 0.004 |
| 857980665    | -14682.835 | 3181.971 | 282.503  | -14031.830 | 2481 | 2500        | 0.008 | -14646.178 | 1408 | 2500        | 0.437 |
| 861967750    | -11682.510 | 1487.437 | 375.029  | -12029.517 | 132  | 2500        | 0.947 | -11929.118 | 255  | 2500        | 0.898 |
| 863126187    | -65277.004 | 5056.248 | 441.164  | -66358.091 | 82   | 2500        | 0.967 | -67402.072 | 0    | 2500        | 1.000 |
| 875002022    | -7625.551  | 1791.123 | 132.851  | -7354.292  | 2271 | 2500        | 0.092 | -7648.549  | 1110 | 2500        | 0.556 |
| 892969023    | -45311.523 | 4231.301 | 333.840  | -44001.021 | 2499 | 2500        | 0.000 | -45310.503 | 1252 | 2500        | 0.499 |
| 901775393    | -7203.285  | 5404.161 | 176.168  | -6267.593  | 2500 | 2500        | 0.000 | -6483.295  | 2499 | 2500        | 0.000 |
| 937495960    | -40082.257 | 5397.751 | 295.511  | -38954.943 | 2489 | 2500        | 0.004 | -40001.830 | 1430 | 2500        | 0.428 |
| 953045535    | -57380.172 | 5630.590 | 248.794  | -56817.572 | 2119 | 2500        | 0.152 | -58368.016 | 68   | 2500        | 0.973 |
| 970836795    | -56476.715 | 4756.746 | 312.412  | -56196.471 | 1759 | 2500        | 0.296 | -57472.673 | 38   | 2500        | 0.985 |
| Passing Rate |            |          |          |            |      | 140 (81.4%) |       |            |      | 159 (92.4%) |       |

\*, \*\* See the bottom notes of Table S3 for the interpretations of the table columns here.

**Table S7.** Test results of fitting MSN (multi-site neutral) model to Gut datasets (*Sites=7, Subjects=11*)

| ID           | $L_o$      | $\theta$ | $M$ -value | Metacommunity |       |       |          | Local community |         |      |          |
|--------------|------------|----------|------------|---------------|-------|-------|----------|-----------------|---------|------|----------|
|              |            |          |            | $L_M$         | $N_M$ | # $N$ | ** $P_M$ | $L_L$           | # $N_L$ | $N$  | ** $P_L$ |
| S400         | -16579.634 | 793.343  | 471.258    | -17899.558    | 0     | 2500  | 1.000    | -16962.178      | 100     | 2500 | 0.960    |
| S401         | -19651.717 | 1043.292 | 655.925    | -21249.517    | 0     | 2500  | 1.000    | -19792.435      | 669     | 2500 | 0.732    |
| S402         | -18346.953 | 721.944  | 1283.276   | -21074.910    | 0     | 2500  | 1.000    | -17978.520      | 2385    | 2500 | 0.046    |
| S403         | -22074.336 | 1046.688 | 881.515    | -24182.092    | 0     | 2500  | 1.000    | -22327.449      | 309     | 2500 | 0.876    |
| S404         | -18179.815 | 726.583  | 970.568    | -20893.803    | 0     | 2500  | 1.000    | -17866.340      | 2254    | 2500 | 0.098    |
| S405         | -19460.183 | 733.333  | 1287.729   | -22214.823    | 0     | 2500  | 1.000    | -19480.938      | 1157    | 2500 | 0.537    |
| S406         | -17741.984 | 679.434  | 731.527    | -21924.779    | 0     | 2500  | 1.000    | -18145.858      | 80      | 2500 | 0.968    |
| S407         | -6527.371  | 225.626  | 1610.896   | -6902.900     | 140   | 2500  | 0.944    | -6500.625       | 1511    | 2500 | 0.396    |
| S408         | -16091.542 | 592.197  | 3864.940   | -18472.707    | 0     | 2500  | 1.000    | -15528.575      | 2498    | 2500 | 0.001    |
| S409         | -11784.623 | 583.757  | 1965.148   | -12257.688    | 86    | 2500  | 0.966    | -11490.875      | 2439    | 2500 | 0.024    |
| S410         | -12919.475 | 590.553  | 2455.416   | -13190.723    | 422   | 2500  | 0.831    | -12815.262      | 1926    | 2500 | 0.230    |
| Passing rate |            |          |            | 11 (100%)     |       |       |          | 8 (72.7%)       |         |      |          |

\*, \*\* See the bottom notes of Table S3 for the interpretations of the table columns here.



**Table S8.** Test results of fitting MSN (multi-site neutral) model to Lung datasets (*Sites=4, Subjects=139*)

| ID  | $L_o$     | $\theta$ | $M$ -value | Metacommunity |         |      |          | Local community |         |      |          |
|-----|-----------|----------|------------|---------------|---------|------|----------|-----------------|---------|------|----------|
|     |           |          |            | $L_M$         | $\#N_M$ | $N$  | ** $P_M$ | $L_L$           | $\#N_L$ | $N$  | ** $P_L$ |
| A1  | -481.585  | 13.308   | 32.427     | -633.426      | 139     | 2500 | 0.944    | -500.514        | 791     | 2500 | 0.684    |
| A2  | -635.672  | 39.788   | 10.439     | -739.906      | 223     | 2500 | 0.911    | -697.429        | 371     | 2500 | 0.852    |
| A3  | -831.167  | 32.854   | 59.980     | -985.861      | 139     | 2500 | 0.944    | -857.579        | 795     | 2500 | 0.682    |
| A4  | -633.801  | 38.131   | 16.412     | -782.176      | 68      | 2500 | 0.973    | -703.590        | 279     | 2500 | 0.888    |
| A5  | -775.792  | 26.854   | 61.989     | -1076.234     | 14      | 2500 | 0.994    | -815.169        | 567     | 2500 | 0.773    |
| A6  | -632.081  | 44.385   | 23.340     | -721.606      | 252     | 2500 | 0.899    | -677.711        | 490     | 2500 | 0.804    |
| A7  | -981.717  | 54.383   | 26.073     | -1124.542     | 134     | 2500 | 0.946    | -1070.326       | 195     | 2500 | 0.922    |
| A8  | -1202.864 | 37.713   | 116.219    | -1398.509     | 129     | 2500 | 0.948    | -1228.659       | 797     | 2500 | 0.681    |
| A9  | -806.786  | 24.873   | 140.023    | -921.278      | 309     | 2500 | 0.876    | -817.724        | 1021    | 2500 | 0.592    |
| A10 | -1152.946 | 53.405   | 58.510     | -1416.979     | 21      | 2500 | 0.992    | -1217.641       | 404     | 2500 | 0.838    |
| A11 | -480.336  | 17.786   | 22.133     | -666.582      | 33      | 2500 | 0.987    | -527.427        | 421     | 2500 | 0.832    |
| A12 | -881.569  | 31.078   | 38.842     | -1008.703     | 280     | 2500 | 0.888    | -923.646        | 536     | 2500 | 0.786    |
| A13 | -782.355  | 37.205   | 44.645     | -1092.645     | 1       | 2500 | 1.000    | -847.280        | 347     | 2500 | 0.861    |
| A14 | -944.301  | 26.664   | 149.449    | -1113.594     | 171     | 2500 | 0.932    | -973.140        | 672     | 2500 | 0.731    |
| A15 | -717.709  | 29.519   | 80.491     | -919.796      | 53      | 2500 | 0.979    | -742.275        | 767     | 2500 | 0.693    |
| A16 | -762.857  | 33.461   | 27.957     | -967.129      | 41      | 2500 | 0.984    | -818.959        | 392     | 2500 | 0.843    |
| A17 | -1005.353 | 44.832   | 69.270     | -1348.469     | 3       | 2500 | 0.999    | -1041.834       | 708     | 2500 | 0.717    |
| A18 | -918.551  | 26.494   | 196.899    | -1165.704     | 52      | 2500 | 0.979    | -917.082        | 1277    | 2500 | 0.489    |
| A19 | -1003.853 | 39.133   | 72.820     | -1171.175     | 138     | 2500 | 0.945    | -1028.952       | 827     | 2500 | 0.669    |
| A20 | -1301.418 | 41.270   | 133.094    | -1521.702     | 120     | 2500 | 0.952    | -1296.284       | 1346    | 2500 | 0.462    |
| A21 | -500.021  | 22.420   | 14.574     | -631.438      | 122     | 2500 | 0.951    | -564.609        | 232     | 2500 | 0.907    |
| A22 | -747.543  | 26.786   | 49.008     | -956.691      | 43      | 2500 | 0.983    | -790.220        | 487     | 2500 | 0.805    |
| A23 | -1112.297 | 65.279   | 25.877     | -1328.097     | 36      | 2500 | 0.986    | -1203.742       | 269     | 2500 | 0.892    |
| A24 | -646.261  | 28.879   | 26.323     | -861.529      | 23      | 2500 | 0.991    | -703.559        | 413     | 2500 | 0.835    |
| A25 | -433.653  | 54.235   | 4.458      | -472.734      | 623     | 2500 | 0.751    | -477.749        | 547     | 2500 | 0.781    |
| A26 | -881.594  | 26.775   | 113.427    | -1144.461     | 39      | 2500 | 0.984    | -904.920        | 751     | 2500 | 0.700    |
| A27 | -879.377  | 33.017   | 81.602     | -1096.477     | 44      | 2500 | 0.982    | -864.733        | 1519    | 2500 | 0.392    |
| A28 | -1392.224 | 49.617   | 184.111    | -1560.640     | 176     | 2500 | 0.930    | -1404.236       | 1043    | 2500 | 0.583    |
| A29 | -601.319  | 22.443   | 130.658    | -773.921      | 72      | 2500 | 0.971    | -609.563        | 1028    | 2500 | 0.589    |
| A30 | -1102.499 | 45.232   | 86.805     | -1335.388     | 36      | 2500 | 0.986    | -1130.304       | 798     | 2500 | 0.681    |
| A31 | -466.648  | 12.703   | 31.878     | -604.759      | 144     | 2500 | 0.942    | -491.886        | 650     | 2500 | 0.740    |
| A32 | -1493.402 | 136.344  | 28.161     | -1563.690     | 608     | 2500 | 0.757    | -1548.852       | 610     | 2500 | 0.756    |
| A33 | -850.605  | 30.923   | 36.715     | -1014.384     | 138     | 2500 | 0.945    | -893.000        | 539     | 2500 | 0.784    |
| A34 | -340.220  | 9.239    | 85.438     | -462.065      | 120     | 2500 | 0.952    | -347.918        | 993     | 2500 | 0.603    |
| A35 | -933.312  | 45.328   | 26.791     | -1113.902     | 71      | 2500 | 0.972    | -1008.715       | 274     | 2500 | 0.890    |
| A36 | -365.316  | 8.821    | 13.723     | -399.360      | 831     | 2500 | 0.668    | -374.947        | 941     | 2500 | 0.624    |
| A37 | -327.078  | 11.743   | 8.040      | -397.446      | 388     | 2500 | 0.845    | -357.555        | 542     | 2500 | 0.783    |
| A38 | -696.465  | 38.329   | 15.625     | -860.874      | 60      | 2500 | 0.976    | -785.245        | 144     | 2500 | 0.942    |
| A39 | -377.544  | 12.715   | 52.068     | -490.203      | 164     | 2500 | 0.934    | -393.927        | 762     | 2500 | 0.695    |
| A40 | -593.877  | 24.858   | 35.520     | -679.450      | 313     | 2500 | 0.875    | -626.410        | 555     | 2500 | 0.778    |
| A41 | -700.266  | 85.026   | 10.705     | -693.222      | 1347    | 2500 | 0.461    | -716.221        | 987     | 2500 | 0.605    |
| A42 | -523.382  | 27.063   | 18.291     | -602.651      | 329     | 2500 | 0.868    | -565.827        | 434     | 2500 | 0.826    |
| A43 | -422.401  | 34.950   | 10.098     | -460.018      | 652     | 2500 | 0.739    | -460.077        | 471     | 2500 | 0.812    |
| A44 | -1164.002 | 78.734   | 48.656     | -1248.952     | 442     | 2500 | 0.823    | -1210.345       | 544     | 2500 | 0.782    |
| A45 | -801.696  | 40.567   | 71.067     | -910.122      | 248     | 2500 | 0.901    | -807.856        | 1130    | 2500 | 0.548    |
| A46 | -402.368  | 19.322   | 31.726     | -572.693      | 26      | 2500 | 0.990    | -432.726        | 621     | 2500 | 0.752    |
| A47 | -239.720  | 39.831   | 2.319      | -257.986      | 851     | 2500 | 0.660    | -265.789        | 668     | 2500 | 0.733    |
| A48 | -375.561  | 49.332   | 5.090      | -432.249      | 422     | 2500 | 0.831    | -439.235        | 251     | 2500 | 0.900    |

|     |           |         |         |           |      |      |       |           |      |      |       |
|-----|-----------|---------|---------|-----------|------|------|-------|-----------|------|------|-------|
| A49 | -769.923  | 59.168  | 28.064  | -875.205  | 199  | 2500 | 0.920 | -828.269  | 416  | 2500 | 0.834 |
| A50 | -637.291  | 37.821  | 174.090 | -716.987  | 332  | 2500 | 0.867 | -633.384  | 1351 | 2500 | 0.460 |
| A51 | -592.193  | 39.520  | 15.818  | -683.722  | 229  | 2500 | 0.908 | -651.593  | 270  | 2500 | 0.892 |
| A52 | -692.850  | 30.303  | 58.519  | -816.472  | 179  | 2500 | 0.928 | -722.260  | 644  | 2500 | 0.742 |
| A53 | -524.058  | 46.398  | 10.832  | -596.332  | 345  | 2500 | 0.862 | -591.201  | 246  | 2500 | 0.902 |
| A54 | -718.359  | 30.362  | 56.328  | -843.279  | 186  | 2500 | 0.926 | -741.836  | 784  | 2500 | 0.686 |
| A55 | -556.148  | 42.928  | 12.851  | -626.349  | 359  | 2500 | 0.856 | -619.660  | 257  | 2500 | 0.897 |
| A56 | -1168.686 | 52.412  | 117.425 | -1278.120 | 362  | 2500 | 0.855 | -1177.683 | 1096 | 2500 | 0.562 |
| A57 | -708.815  | 85.690  | 14.672  | -761.435  | 553  | 2500 | 0.779 | -766.497  | 452  | 2500 | 0.819 |
| A58 | -475.024  | 18.111  | 79.112  | -638.999  | 59   | 2500 | 0.976 | -489.821  | 882  | 2500 | 0.647 |
| A59 | -581.983  | 143.288 | 17.633  | -567.668  | 1460 | 2500 | 0.416 | -591.224  | 1068 | 2500 | 0.573 |
| A60 | -684.417  | 37.724  | 41.429  | -863.959  | 37   | 2500 | 0.985 | -723.475  | 557  | 2500 | 0.777 |
| A61 | -356.233  | 49.132  | 7.863   | -399.628  | 483  | 2500 | 0.807 | -389.665  | 657  | 2500 | 0.737 |
| A62 | -279.578  | 10.139  | 53.048  | -403.566  | 86   | 2500 | 0.966 | -292.145  | 889  | 2500 | 0.644 |
| A63 | -564.309  | 34.975  | 24.473  | -694.842  | 78   | 2500 | 0.969 | -611.486  | 434  | 2500 | 0.826 |
| A64 | -631.630  | 24.088  | 110.597 | -799.006  | 66   | 2500 | 0.974 | -640.413  | 1041 | 2500 | 0.584 |
| A65 | -832.641  | 28.564  | 445.516 | -953.871  | 236  | 2500 | 0.906 | -850.814  | 787  | 2500 | 0.685 |
| A66 | -745.308  | 31.213  | 68.785  | -852.050  | 287  | 2500 | 0.885 | -771.489  | 721  | 2500 | 0.712 |
| A67 | -1117.974 | 49.408  | 263.954 | -1292.837 | 92   | 2500 | 0.963 | -1127.834 | 1080 | 2500 | 0.568 |
| A68 | -414.720  | 16.437  | 22.675  | -486.876  | 419  | 2500 | 0.832 | -441.165  | 597  | 2500 | 0.761 |
| A69 | -236.445  | 8.034   | 31.924  | -336.590  | 152  | 2500 | 0.939 | -248.950  | 838  | 2500 | 0.665 |
| A70 | -779.776  | 44.096  | 39.536  | -928.667  | 83   | 2500 | 0.967 | -840.604  | 318  | 2500 | 0.873 |
| A71 | -781.595  | 36.752  | 135.561 | -957.130  | 56   | 2500 | 0.978 | -796.926  | 955  | 2500 | 0.618 |
| A72 | -190.788  | 14.231  | 3.277   | -236.116  | 398  | 2500 | 0.841 | -228.131  | 350  | 2500 | 0.860 |
| A73 | -359.425  | 19.878  | 81.326  | -396.710  | 635  | 2500 | 0.746 | -352.362  | 1441 | 2500 | 0.424 |
| A74 | -134.719  | 6.161   | 27.229  | -190.665  | 222  | 2500 | 0.911 | -138.465  | 1092 | 2500 | 0.563 |
| A75 | -488.689  | 34.104  | 12.370  | -566.448  | 295  | 2500 | 0.882 | -535.961  | 416  | 2500 | 0.834 |
| A76 | -513.202  | 23.556  | 96.329  | -736.375  | 3    | 2500 | 0.999 | -537.589  | 698  | 2500 | 0.721 |
| A77 | -658.369  | 28.604  | 100.971 | -856.826  | 35   | 2500 | 0.986 | -682.462  | 723  | 2500 | 0.711 |
| A78 | -491.325  | 22.261  | 26.939  | -578.895  | 274  | 2500 | 0.890 | -512.091  | 841  | 2500 | 0.664 |
| A79 | -683.622  | 59.319  | 18.110  | -772.618  | 239  | 2500 | 0.904 | -741.843  | 364  | 2500 | 0.854 |
| A80 | -487.943  | 17.901  | 84.320  | -566.840  | 355  | 2500 | 0.858 | -472.119  | 1625 | 2500 | 0.350 |
| A81 | -575.185  | 35.644  | 14.130  | -631.418  | 546  | 2500 | 0.782 | -633.004  | 303  | 2500 | 0.879 |
| A82 | -501.780  | 27.089  | 91.015  | -648.984  | 36   | 2500 | 0.986 | -535.411  | 495  | 2500 | 0.802 |
| A83 | -676.014  | 27.378  | 119.435 | -872.139  | 36   | 2500 | 0.986 | -683.056  | 1096 | 2500 | 0.562 |
| A84 | -845.225  | 37.586  | 91.317  | -1024.070 | 75   | 2500 | 0.970 | -869.465  | 807  | 2500 | 0.677 |
| A85 | -546.472  | 40.104  | 14.002  | -608.324  | 442  | 2500 | 0.823 | -591.110  | 509  | 2500 | 0.796 |
| A86 | -257.900  | 12.178  | 36.144  | -370.616  | 67   | 2500 | 0.973 | -271.466  | 858  | 2500 | 0.657 |
| A87 | -646.742  | 21.854  | 120.606 | -736.411  | 380  | 2500 | 0.848 | -650.484  | 1143 | 2500 | 0.543 |
| A88 | -632.478  | 65.742  | 11.103  | -683.905  | 526  | 2500 | 0.790 | -699.938  | 315  | 2500 | 0.874 |
| A89 | -582.524  | 35.163  | 19.891  | -677.434  | 217  | 2500 | 0.913 | -625.529  | 526  | 2500 | 0.790 |
| A90 | -828.200  | 32.852  | 164.205 | -940.965  | 265  | 2500 | 0.894 | -805.981  | 1712 | 2500 | 0.315 |
| A91 | -588.770  | 79.764  | 13.318  | -613.797  | 844  | 2500 | 0.662 | -618.909  | 771  | 2500 | 0.692 |
| A92 | -668.989  | 23.558  | 113.201 | -785.512  | 226  | 2500 | 0.910 | -678.852  | 1007 | 2500 | 0.597 |
| A93 | -561.680  | 20.748  | 62.370  | -679.304  | 179  | 2500 | 0.928 | -580.378  | 793  | 2500 | 0.683 |
| A94 | -570.575  | 34.380  | 15.664  | -641.455  | 397  | 2500 | 0.841 | -614.161  | 482  | 2500 | 0.807 |
| A95 | -300.648  | 28.962  | 5.288   | -364.052  | 288  | 2500 | 0.885 | -356.426  | 270  | 2500 | 0.892 |
| A96 | -669.229  | 36.580  | 50.111  | -760.998  | 284  | 2500 | 0.886 | -681.169  | 1024 | 2500 | 0.590 |
| A97 | -535.374  | 32.079  | 74.734  | -588.065  | 519  | 2500 | 0.792 | -539.700  | 1138 | 2500 | 0.545 |
| A98 | -235.909  | 7.642   | 64.477  | -329.876  | 170  | 2500 | 0.932 | -244.575  | 877  | 2500 | 0.649 |
| A99 | -341.040  | 15.080  | 22.197  | -459.011  | 116  | 2500 | 0.954 | -372.943  | 549  | 2500 | 0.780 |

|              |           |        |         |           |      |            |       |           |            |      |       |
|--------------|-----------|--------|---------|-----------|------|------------|-------|-----------|------------|------|-------|
| A100         | -530.120  | 58.145 | 8.798   | -591.725  | 394  | 2500       | 0.842 | -586.470  | 353        | 2500 | 0.859 |
| A101         | -328.432  | 20.812 | 31.086  | -395.005  | 287  | 2500       | 0.885 | -352.157  | 638        | 2500 | 0.745 |
| A102         | -544.809  | 32.459 | 106.771 | -639.924  | 202  | 2500       | 0.919 | -524.912  | 1666       | 2500 | 0.334 |
| A103         | -711.908  | 60.612 | 13.583  | -755.577  | 664  | 2500       | 0.734 | -786.569  | 213        | 2500 | 0.915 |
| A104         | -372.289  | 49.530 | 5.210   | -380.714  | 1102 | 2500       | 0.559 | -388.904  | 926        | 2500 | 0.630 |
| A105         | -979.389  | 54.562 | 58.532  | -1116.589 | 147  | 2500       | 0.941 | -1019.704 | 564        | 2500 | 0.774 |
| A106         | -245.519  | 14.699 | 19.486  | -281.792  | 550  | 2500       | 0.780 | -257.963  | 844        | 2500 | 0.662 |
| A107         | -976.774  | 47.044 | 80.998  | -1021.825 | 740  | 2500       | 0.704 | -985.838  | 1080       | 2500 | 0.568 |
| A108         | -462.724  | 16.520 | 50.376  | -545.481  | 331  | 2500       | 0.868 | -472.348  | 988        | 2500 | 0.605 |
| A109         | -446.153  | 16.614 | 70.941  | -578.916  | 100  | 2500       | 0.960 | -452.445  | 1069       | 2500 | 0.572 |
| A110         | -68.691   | 2.107  | 23.383  | -118.290  | 333  | 2500       | 0.867 | -70.553   | 1148       | 2500 | 0.541 |
| A111         | -377.544  | 17.657 | 21.558  | -506.777  | 81   | 2500       | 0.968 | -414.802  | 492        | 2500 | 0.803 |
| R01          | -665.016  | 30.522 | 15.905  | -797.250  | 170  | 2500       | 0.932 | -726.584  | 314        | 2500 | 0.874 |
| R02          | -926.502  | 48.011 | 34.118  | -1097.671 | 69   | 2500       | 0.972 | -978.269  | 527        | 2500 | 0.789 |
| R03          | -630.347  | 37.146 | 13.062  | -794.112  | 67   | 2500       | 0.973 | -721.818  | 145        | 2500 | 0.942 |
| R04          | -824.575  | 23.776 | 103.929 | -1059.826 | 45   | 2500       | 0.982 | -837.462  | 977        | 2500 | 0.609 |
| R05          | -320.844  | 7.614  | 23.280  | -408.870  | 316  | 2500       | 0.874 | -331.238  | 946        | 2500 | 0.622 |
| R06          | -264.228  | 11.428 | 24.178  | -498.473  | 1    | 2500       | 1.000 | -298.934  | 512        | 2500 | 0.795 |
| R07          | -521.993  | 18.887 | 52.933  | -803.576  | 3    | 2500       | 0.999 | -541.411  | 840        | 2500 | 0.664 |
| R08          | -595.801  | 34.836 | 10.318  | -681.581  | 309  | 2500       | 0.876 | -679.910  | 125        | 2500 | 0.950 |
| R09          | -1009.911 | 36.269 | 47.874  | -1182.466 | 130  | 2500       | 0.948 | -1050.154 | 595        | 2500 | 0.762 |
| R10          | -838.034  | 36.327 | 28.819  | -1070.206 | 23   | 2500       | 0.991 | -930.290  | 129        | 2500 | 0.948 |
| R11          | -1461.111 | 53.252 | 171.399 | -1765.924 | 26   | 2500       | 0.990 | -1485.674 | 857        | 2500 | 0.657 |
| R12          | -968.690  | 59.388 | 20.164  | -1074.740 | 295  | 2500       | 0.882 | -1040.145 | 353        | 2500 | 0.859 |
| R13          | -347.702  | 27.445 | 4.441   | -376.901  | 743  | 2500       | 0.703 | -388.750  | 465        | 2500 | 0.814 |
| R14          | -792.902  | 50.885 | 37.197  | -929.453  | 105  | 2500       | 0.958 | -816.782  | 916        | 2500 | 0.634 |
| R15          | -1068.437 | 33.697 | 109.968 | -1323.935 | 36   | 2500       | 0.986 | -1093.837 | 805        | 2500 | 0.678 |
| R16          | -632.163  | 22.894 | 48.285  | -884.079  | 26   | 2500       | 0.990 | -656.418  | 748        | 2500 | 0.701 |
| R17          | -872.927  | 28.039 | 64.287  | -1087.557 | 62   | 2500       | 0.975 | -914.444  | 521        | 2500 | 0.792 |
| R18          | -998.375  | 31.082 | 139.459 | -1219.017 | 68   | 2500       | 0.973 | -1035.500 | 590        | 2500 | 0.764 |
| R19          | -1026.748 | 40.335 | 79.857  | -1325.459 | 11   | 2500       | 0.996 | -1076.786 | 518        | 2500 | 0.793 |
| R20          | -489.987  | 34.580 | 9.058   | -593.647  | 147  | 2500       | 0.941 | -559.801  | 202        | 2500 | 0.919 |
| R22          | -871.992  | 33.939 | 32.549  | -1032.431 | 142  | 2500       | 0.943 | -935.371  | 330        | 2500 | 0.868 |
| R24          | -909.782  | 32.311 | 62.581  | -1186.178 | 17   | 2500       | 0.993 | -953.761  | 526        | 2500 | 0.790 |
| R25          | -1497.358 | 55.279 | 198.425 | -1863.323 | 9    | 2500       | 0.996 | -1536.909 | 655        | 2500 | 0.738 |
| R26          | -643.863  | 29.236 | 57.518  | -1032.539 | 0    | 2500       | 1.000 | -704.807  | 327        | 2500 | 0.869 |
| R27          | -981.255  | 49.745 | 80.729  | -1230.919 | 17   | 2500       | 0.993 | -1016.385 | 721        | 2500 | 0.712 |
| R28          | -723.283  | 33.166 | 19.654  | -895.698  | 81   | 2500       | 0.968 | -784.316  | 311        | 2500 | 0.876 |
| R29          | -1036.742 | 35.963 | 94.123  | -1320.895 | 22   | 2500       | 0.991 | -1076.479 | 629        | 2500 | 0.748 |
| R30          | -944.673  | 63.054 | 21.946  | -1113.432 | 72   | 2500       | 0.971 | -1028.655 | 249        | 2500 | 0.900 |
| Passing rate |           |        |         |           |      | 139 (100%) |       |           | 139 (100%) |      |       |

\*, \*\* See the bottom notes of Table S3 for the interpretations of the table columns here.

**Table S9.** Test results of fitting NNH (multi-site neutral) model to HMP-oral datasets ( $Sites \geq 2$ ,  $Subjects = 146$ )

| Group ID  | $J$       | $S$      | $\theta$ | $m$   | $x$   | $\gamma$ | $R^2$ | $\chi^2$ | $p$ -value | $N_{pass}$ | $\%_{(pass)}$ |
|-----------|-----------|----------|----------|-------|-------|----------|-------|----------|------------|------------|---------------|
| 132902142 | 6648.500  | 1061.167 | 1132.737 | 0.000 | 0.472 | 1.010    | 0.999 | 28.682   | 0.001      | 4          | 66.7          |
| 147406386 | 5582.889  | 906.889  | 971.944  | 0.000 | 0.481 | 1.009    | 0.999 | 39.912   | 0.000      | 3          | 33.3          |
| 158013734 | 2945.889  | 783.444  | 1080.420 | 0.000 | 0.419 | 1.013    | 0.999 | 37.848   | 0.000      | 4          | 44.4          |
| 158114885 | 3804.778  | 988.444  | 1201.062 | 0.000 | 0.450 | 1.005    | 0.999 | 35.491   | 0.000      | 2          | 22.2          |
| 158155345 | 3687.778  | 785.556  | 894.895  | 0.000 | 0.466 | 1.009    | 0.999 | 49.619   | 0.000      | 2          | 22.2          |
| 158216035 | 5623.556  | 1013.889 | 1032.861 | 0.000 | 0.494 | 1.005    | 0.999 | 29.593   | 0.001      | 1          | 11.1          |
| 158236265 | 4897.500  | 979.000  | 1222.320 | 0.000 | 0.434 | 1.020    | 0.999 | 116.264  | 0.000      | 4          | 50.0          |
| 158276726 | 6286.444  | 819.444  | 819.624  | 0.000 | 0.490 | 1.012    | 0.999 | 36.296   | 0.000      | 4          | 44.4          |
| 158398106 | 5072.167  | 780.944  | 786.056  | 0.000 | 0.495 | 1.006    | 0.999 | 63.180   | 0.000      | 7          | 38.9          |
| 158418336 | 5351.588  | 1009.000 | 1180.896 | 0.000 | 0.440 | 1.015    | 0.998 | 127.468  | 0.000      | 12         | 70.6          |
| 158438567 | 8502.056  | 1108.722 | 1055.604 | 0.000 | 0.501 | 1.007    | 0.999 | 88.397   | 0.000      | 11         | 61.1          |
| 158458797 | 7066.944  | 987.167  | 994.280  | 0.000 | 0.484 | 1.006    | 0.999 | 72.837   | 0.000      | 4          | 22.2          |
| 158479027 | 5238.556  | 1026.778 | 1217.791 | 0.000 | 0.448 | 1.015    | 0.998 | 67.947   | 0.000      | 4          | 44.4          |
| 158499257 | 4589.556  | 879.333  | 1138.474 | 0.000 | 0.425 | 1.022    | 0.999 | 95.084   | 0.000      | 5          | 55.6          |
| 158721788 | 5271.889  | 918.111  | 1182.532 | 0.000 | 0.420 | 1.030    | 0.998 | 174.147  | 0.000      | 6          | 66.7          |
| 158742018 | 5597.278  | 1009.611 | 1094.233 | 0.000 | 0.466 | 1.009    | 0.999 | 90.358   | 0.000      | 13         | 72.2          |
| 158802708 | 7309.667  | 1109.556 | 1277.741 | 0.000 | 0.468 | 1.005    | 1.000 | 29.009   | 0.001      | 3          | 33.3          |
| 158822939 | 13154.222 | 1760.889 | 1709.656 | 0.000 | 0.507 | 1.000    | 1.000 | 40.559   | 0.000      | 4          | 44.4          |
| 158883629 | 7604.722  | 1097.000 | 1197.944 | 0.000 | 0.476 | 1.009    | 0.999 | 407.160  | 0.000      | 8          | 44.4          |
| 158924089 | 16954.444 | 1923.889 | 1834.747 | 0.000 | 0.500 | 1.003    | 1.000 | 16.368   | 0.090      | 4          | 44.4          |
| 158944319 | 7920.000  | 1052.556 | 1118.341 | 0.000 | 0.475 | 1.017    | 0.999 | 105.979  | 0.000      | 6          | 66.7          |
| 158964549 | 8978.778  | 1207.778 | 1188.980 | 0.000 | 0.485 | 1.010    | 0.999 | 74.751   | 0.000      | 8          | 44.4          |
| 158984779 | 5502.000  | 700.571  | 703.005  | 0.000 | 0.484 | 1.028    | 0.997 | 93.340   | 0.000      | 4          | 57.1          |
| 159005010 | 10032.667 | 1615.778 | 1662.267 | 0.000 | 0.488 | 1.007    | 1.000 | 29.654   | 0.001      | 4          | 44.4          |
| 159025240 | 5305.222  | 862.333  | 1018.033 | 0.000 | 0.451 | 1.013    | 0.999 | 70.482   | 0.000      | 5          | 55.6          |
| 159085930 | 9390.889  | 1416.111 | 1401.282 | 0.000 | 0.491 | 1.009    | 1.000 | 46.413   | 0.000      | 4          | 44.4          |
| 159146620 | 11161.556 | 1404.333 | 1406.052 | 0.000 | 0.490 | 1.013    | 0.999 | 113.157  | 0.000      | 9          | 50.0          |
| 159166850 | 12632.667 | 1486.111 | 1430.451 | 0.000 | 0.494 | 1.013    | 0.999 | 146.382  | 0.000      | 12         | 66.7          |
| 159227541 | 6197.278  | 1163.833 | 1319.220 | 0.000 | 0.466 | 1.010    | 0.999 | 74.897   | 0.000      | 6          | 33.3          |
| 159247771 | 6674.889  | 1208.556 | 1420.739 | 0.000 | 0.454 | 1.010    | 1.000 | 63.191   | 0.000      | 5          | 55.6          |
| 159389382 | 6196.944  | 1016.944 | 1045.877 | 0.000 | 0.477 | 1.005    | 1.000 | 38.642   | 0.000      | 8          | 44.4          |
| 159470302 | 16095.889 | 2002.222 | 1830.911 | 0.000 | 0.519 | 1.011    | 0.999 | 104.081  | 0.000      | 7          | 77.8          |
| 159713063 | 13551.444 | 1663.111 | 1511.823 | 0.000 | 0.520 | 1.007    | 0.999 | 53.440   | 0.000      | 4          | 44.4          |
| 159733294 | 12529.222 | 1731.111 | 1754.594 | 0.000 | 0.498 | 1.008    | 0.999 | 58.365   | 0.000      | 5          | 55.6          |
| 160744799 | 1895.000  | 507.889  | 878.187  | 0.001 | 0.365 | 1.014    | 1.000 | 317.708  | 0.000      | 5          | 55.6          |
| 160825720 | 1629.500  | 535.444  | 844.746  | 0.001 | 0.401 | 1.001    | 1.000 | 18.569   | 0.017      | 2          | 11.1          |
| 160866180 | 1652.063  | 522.188  | 907.849  | 0.001 | 0.372 | 1.008    | 1.000 | 53.076   | 0.000      | 6          | 37.5          |
| 160886410 | 1671.889  | 530.667  | 857.071  | 0.001 | 0.380 | 1.009    | 1.000 | 120.061  | 0.000      | 3          | 33.3          |
| 160906640 | 2121.111  | 637.000  | 1070.756 | 0.000 | 0.373 | 1.011    | 1.000 | 102.767  | 0.000      | 5          | 55.6          |
| 160947100 | 1937.056  | 673.944  | 1169.945 | 0.001 | 0.375 | 1.005    | 1.000 | 19.179   | 0.014      | 5          | 27.8          |
| 160967330 | 1926.778  | 557.778  | 862.549  | 0.001 | 0.403 | 1.008    | 0.999 | 18.270   | 0.011      | 2          | 22.2          |
| 160987560 | 1667.667  | 544.000  | 984.890  | 0.002 | 0.413 | 0.975    | 1.000 | 38.798   | 0.000      | 3          | 33.3          |
| 161007791 | 1714.250  | 538.375  | 859.668  | 0.001 | 0.387 | 1.005    | 1.000 | 52.695   | 0.000      | 2          | 25.0          |
| 161270782 | 1701.143  | 592.571  | 1037.819 | 0.001 | 0.370 | 1.005    | 1.000 | 44.611   | 0.000      | 2          | 28.6          |
| 161311242 | 1662.167  | 548.333  | 1011.752 | 0.001 | 0.353 | 1.018    | 0.998 | 80.675   | 0.000      | 3          | 50.0          |
| 161412393 | 1762.333  | 665.667  | 1168.713 | 0.001 | 0.361 | 1.012    | 0.998 | 14.640   | 0.023      | 1          | 33.3          |

|           |           |          |          |       |       |       |       |           |       |    |      |
|-----------|-----------|----------|----------|-------|-------|-------|-------|-----------|-------|----|------|
| 161473083 | 2533.889  | 620.333  | 864.645  | 0.000 | 0.424 | 1.009 | 0.999 | 246.060   | 0.000 | 3  | 33.3 |
| 161554003 | 2830.778  | 572.111  | 688.811  | 0.000 | 0.454 | 1.007 | 0.999 | 44.120    | 0.000 | 3  | 33.3 |
| 178713055 | 6283.571  | 949.143  | 981.375  | 0.000 | 0.491 | 1.003 | 1.000 | 7.964     | 0.632 | 1  | 14.3 |
| 184349034 | 5673.000  | 1072.667 | 1263.413 | 0.000 | 0.456 | 1.009 | 0.999 | 19.131    | 0.024 | 2  | 66.7 |
| 208027353 | 4418.333  | 984.000  | 1123.994 | 0.000 | 0.472 | 1.001 | 1.000 | 29.221    | 0.001 | 2  | 22.2 |
| 246515023 | 700.222   | 402.667  | 1061.209 | 0.001 | 0.293 | 0.994 | 1.000 | 0.676     | 0.984 | 1  | 11.1 |
| 256789458 | 3455.750  | 782.000  | 1053.043 | 0.000 | 0.418 | 1.019 | 0.999 | 57.079    | 0.000 | 3  | 75.0 |
| 275382046 | 4123.000  | 824.000  | 898.306  | 0.000 | 0.479 | 1.008 | 0.998 | 13.888    | 0.085 | 1  | 33.3 |
| 289996019 | 8677.111  | 900.222  | 875.446  | 0.000 | 0.496 | 1.010 | 0.999 | 29034.593 | 0.000 | 6  | 33.3 |
| 295137534 | 1276.750  | 417.000  | 708.151  | 0.001 | 0.374 | 1.007 | 0.999 | 19.035    | 0.015 | 2  | 25.0 |
| 336497421 | 2149.333  | 574.000  | 862.561  | 0.000 | 0.403 | 1.011 | 0.999 | 135.396   | 0.000 | 5  | 55.6 |
| 368533040 | 1558.300  | 526.700  | 840.336  | 0.001 | 0.380 | 0.991 | 1.000 | 7.265     | 0.508 | 1  | 10.0 |
| 370027359 | 3413.111  | 654.333  | 764.599  | 0.000 | 0.455 | 1.011 | 0.999 | 57.941    | 0.000 | 4  | 44.4 |
| 370425937 | 2811.250  | 605.750  | 784.289  | 0.000 | 0.434 | 1.008 | 0.999 | 61.809    | 0.000 | 4  | 33.3 |
| 375450439 | 4165.941  | 944.706  | 1138.892 | 0.000 | 0.447 | 1.011 | 0.999 | 87.530    | 0.000 | 4  | 23.5 |
| 404239096 | 3334.000  | 801.000  | 985.977  | 0.000 | 0.448 | 1.004 | 1.000 | 17.032    | 0.048 | 3  | 33.3 |
| 414519462 | 2322.444  | 516.000  | 713.235  | 0.000 | 0.416 | 1.015 | 0.999 | 67.651    | 0.000 | 4  | 44.4 |
| 451588811 | 1955.429  | 559.143  | 838.012  | 0.001 | 0.398 | 1.016 | 0.999 | 52.567    | 0.000 | 4  | 57.1 |
| 465578759 | 7541.556  | 810.000  | 821.763  | 0.000 | 0.487 | 1.007 | 0.999 | 36.515    | 0.000 | 2  | 22.2 |
| 492786515 | 2983.111  | 566.667  | 695.474  | 0.000 | 0.448 | 1.007 | 1.000 | 45.177    | 0.000 | 2  | 22.2 |
| 508703490 | 3261.500  | 599.875  | 668.728  | 0.000 | 0.465 | 1.018 | 0.999 | 41.410    | 0.000 | 3  | 37.5 |
| 514014184 | 2001.000  | 486.000  | 649.836  | 0.001 | 0.425 | 1.020 | 0.999 | 9.763     | 0.202 | 1  | 50.0 |
| 516889361 | 7393.500  | 908.000  | 901.214  | 0.001 | 0.459 | 1.006 | 1.000 | 3.037     | 0.981 | 1  | 50.0 |
| 517810313 | 5252.333  | 786.444  | 738.736  | 0.000 | 0.529 | 0.999 | 1.000 | 20.380    | 0.016 | 2  | 22.2 |
| 553359145 | 5394.875  | 887.375  | 975.085  | 0.000 | 0.472 | 1.008 | 0.999 | 38.175    | 0.000 | 2  | 25.0 |
| 604812005 | 869.889   | 430.778  | 1046.581 | 0.001 | 0.294 | 1.005 | 1.000 | 28.435    | 0.000 | 4  | 44.4 |
| 612472597 | 4961.111  | 1081.667 | 1240.088 | 0.000 | 0.462 | 1.006 | 0.999 | 84.734    | 0.000 | 4  | 44.4 |
| 638754422 | 2470.500  | 654.500  | 1025.181 | 0.000 | 0.393 | 1.014 | 0.999 | 100.960   | 0.000 | 3  | 37.5 |
| 643185023 | 4219.500  | 746.500  | 983.962  | 0.000 | 0.416 | 1.029 | 0.998 | 110.416   | 0.000 | 5  | 83.3 |
| 650853796 | 2358.714  | 710.000  | 1154.538 | 0.000 | 0.386 | 1.005 | 1.000 | 27.383    | 0.001 | 2  | 28.6 |
| 658594300 | 4569.750  | 789.000  | 896.364  | 0.000 | 0.468 | 1.007 | 1.000 | 17.316    | 0.044 | 1  | 25.0 |
| 663835652 | 4831.125  | 931.875  | 1130.549 | 0.000 | 0.452 | 1.012 | 0.999 | 56.195    | 0.000 | 5  | 62.5 |
| 668248235 | 5892.222  | 891.000  | 874.474  | 0.000 | 0.503 | 1.001 | 1.000 | 30.366    | 0.001 | 1  | 11.1 |
| 682449369 | 4781.222  | 1045.889 | 1091.601 | 0.000 | 0.490 | 0.999 | 1.000 | 19.215    | 0.014 | 3  | 33.3 |
| 686765762 | 1876.333  | 511.222  | 808.928  | 0.001 | 0.386 | 1.009 | 1.000 | 58.830    | 0.000 | 7  | 38.9 |
| 737052003 | 7506.444  | 1024.889 | 948.336  | 0.000 | 0.520 | 1.006 | 0.999 | 28.188    | 0.001 | 2  | 22.2 |
| 763395383 | 5344.778  | 993.444  | 1134.419 | 0.000 | 0.467 | 1.003 | 1.000 | 19.638    | 0.020 | 4  | 44.4 |
| 763435843 | 8764.778  | 1086.111 | 1109.788 | 0.000 | 0.476 | 1.022 | 0.999 | 3269.063  | 0.000 | 3  | 33.3 |
| 763456073 | 5227.444  | 916.556  | 853.269  | 0.000 | 0.520 | 0.999 | 0.999 | 38.846    | 0.000 | 1  | 11.1 |
| 763476303 | 3753.375  | 648.125  | 682.338  | 0.000 | 0.487 | 1.008 | 0.999 | 24.611    | 0.006 | 3  | 37.5 |
| 763516763 | 4537.625  | 721.875  | 772.820  | 0.000 | 0.470 | 1.015 | 0.998 | 85.025    | 0.000 | 8  | 50.0 |
| 763536994 | 7038.760  | 955.760  | 969.690  | 0.000 | 0.483 | 1.011 | 0.999 | 102.981   | 0.000 | 14 | 56.0 |
| 763557224 | 4493.250  | 597.375  | 566.161  | 0.000 | 0.497 | 1.006 | 0.999 | 91.343    | 0.000 | 3  | 37.5 |
| 763597684 | 11727.688 | 1430.188 | 1282.945 | 0.000 | 0.524 | 1.009 | 0.998 | 139.888   | 0.000 | 6  | 37.5 |
| 763638144 | 4263.188  | 879.000  | 1078.183 | 0.000 | 0.434 | 1.010 | 1.000 | 29.412    | 0.001 | 6  | 37.5 |
| 763698834 | 11723.667 | 1325.600 | 1149.329 | 0.000 | 0.531 | 1.007 | 0.999 | 63.571    | 0.000 | 7  | 46.7 |
| 763719065 | 3512.176  | 707.412  | 784.369  | 0.000 | 0.470 | 1.004 | 1.000 | 21.865    | 0.009 | 3  | 17.6 |
| 763759525 | 4963.563  | 845.813  | 890.689  | 0.000 | 0.476 | 1.006 | 0.999 | 32.768    | 0.000 | 5  | 31.3 |
| 763820215 | 4436.706  | 690.059  | 796.394  | 0.000 | 0.451 | 1.016 | 0.999 | 224.582   | 0.000 | 10 | 58.8 |
| 763840445 | 5462.444  | 1020.222 | 1075.188 | 0.000 | 0.488 | 1.002 | 0.999 | 53.378    | 0.000 | 7  | 38.9 |
| 763860675 | 5048.667  | 882.111  | 894.629  | 0.000 | 0.494 | 1.002 | 0.999 | 39.010    | 0.000 | 8  | 44.4 |

|              |          |          |          |       |       |       |       |          |       |    |      |
|--------------|----------|----------|----------|-------|-------|-------|-------|----------|-------|----|------|
| 763880905    | 5964.111 | 885.333  | 934.012  | 0.000 | 0.495 | 1.012 | 0.998 | 45.115   | 0.000 | 3  | 33.3 |
| 763901136    | 3756.133 | 885.533  | 1180.456 | 0.000 | 0.430 | 1.005 | 1.000 | 38.725   | 0.000 | 6  | 40.0 |
| 763921366    | 5017.111 | 1003.000 | 1106.457 | 0.000 | 0.472 | 1.011 | 0.999 | 39.406   | 0.000 | 3  | 33.3 |
| 763982056    | 6177.167 | 885.833  | 882.407  | 0.000 | 0.497 | 1.011 | 0.999 | 75.119   | 0.000 | 6  | 33.3 |
| 764002286    | 7165.813 | 1025.125 | 1021.006 | 0.000 | 0.493 | 1.012 | 0.999 | 64.687   | 0.000 | 5  | 31.3 |
| 764042746    | 3440.188 | 715.063  | 906.748  | 0.000 | 0.441 | 1.008 | 0.999 | 115.152  | 0.000 | 5  | 31.3 |
| 764062976    | 6430.294 | 965.412  | 949.583  | 0.000 | 0.499 | 1.011 | 0.998 | 115.514  | 0.000 | 9  | 52.9 |
| 764083206    | 7766.278 | 1200.111 | 1258.211 | 0.000 | 0.485 | 1.012 | 0.999 | 121.072  | 0.000 | 11 | 61.1 |
| 764143897    | 6710.444 | 1080.667 | 1060.366 | 0.000 | 0.500 | 1.004 | 0.999 | 49.210   | 0.000 | 5  | 27.8 |
| 764184357    | 4291.588 | 926.824  | 1082.941 | 0.000 | 0.463 | 1.006 | 0.999 | 60.470   | 0.000 | 4  | 23.5 |
| 764224817    | 6296.889 | 947.333  | 911.596  | 0.000 | 0.516 | 1.003 | 0.998 | 62.927   | 0.000 | 5  | 27.8 |
| 764245047    | 7102.625 | 753.000  | 639.499  | 0.000 | 0.532 | 1.008 | 0.995 | 69.281   | 0.000 | 4  | 50.0 |
| 764285508    | 5714.444 | 887.556  | 856.215  | 0.000 | 0.508 | 1.013 | 0.998 | 71.548   | 0.000 | 5  | 55.6 |
| 764305738    | 9509.389 | 1133.000 | 1132.335 | 0.000 | 0.488 | 1.005 | 0.999 | 68.525   | 0.000 | 5  | 27.8 |
| 764325968    | 7101.267 | 1052.133 | 983.104  | 0.000 | 0.515 | 1.006 | 0.999 | 41.503   | 0.000 | 5  | 33.3 |
| 764346198    | 3788.125 | 704.063  | 833.891  | 0.000 | 0.458 | 1.007 | 1.000 | 81.286   | 0.000 | 5  | 31.3 |
| 764366428    | 5016.125 | 693.000  | 678.610  | 0.000 | 0.492 | 1.022 | 0.998 | 48.530   | 0.000 | 4  | 50.0 |
| 764447348    | 4046.833 | 586.167  | 592.432  | 0.001 | 0.484 | 1.011 | 0.998 | 77.722   | 0.000 | 7  | 38.9 |
| 764467579    | 3893.063 | 832.125  | 1042.278 | 0.000 | 0.453 | 1.003 | 1.000 | 10.929   | 0.363 | 5  | 31.3 |
| 764487809    | 6073.471 | 847.000  | 863.752  | 0.000 | 0.491 | 1.008 | 0.999 | 49.448   | 0.000 | 7  | 41.2 |
| 764508039    | 4602.500 | 794.250  | 844.009  | 0.000 | 0.475 | 1.014 | 0.999 | 33.890   | 0.000 | 2  | 25.0 |
| 764588959    | 4764.444 | 775.556  | 762.151  | 0.000 | 0.502 | 1.005 | 0.999 | 21.731   | 0.010 | 2  | 22.2 |
| 764649650    | 4475.556 | 812.222  | 876.082  | 0.000 | 0.481 | 1.005 | 1.000 | 16.962   | 0.049 | 4  | 44.4 |
| 764669880    | 4973.941 | 1023.529 | 1244.771 | 0.000 | 0.452 | 1.006 | 1.000 | 118.447  | 0.000 | 6  | 35.3 |
| 764750800    | 4764.333 | 1023.222 | 1250.317 | 0.000 | 0.451 | 1.007 | 0.999 | 32.289   | 0.000 | 3  | 33.3 |
| 764811490    | 7730.556 | 1023.444 | 984.893  | 0.000 | 0.511 | 1.009 | 0.999 | 29.540   | 0.002 | 2  | 22.2 |
| 764831721    | 4387.444 | 982.667  | 1270.348 | 0.000 | 0.432 | 1.006 | 1.000 | 21.847   | 0.016 | 2  | 22.2 |
| 764872181    | 4315.333 | 836.667  | 854.258  | 0.000 | 0.496 | 1.001 | 1.000 | 11.973   | 0.152 | 0  | 0.0  |
| 764892411    | 4008.333 | 879.667  | 999.047  | 0.000 | 0.467 | 1.006 | 0.998 | 34.038   | 0.000 | 2  | 22.2 |
| 764953101    | 4620.556 | 940.889  | 1163.971 | 0.000 | 0.443 | 1.012 | 1.000 | 63.436   | 0.000 | 4  | 44.4 |
| 765013792    | 3762.889 | 886.444  | 1066.650 | 0.000 | 0.456 | 1.002 | 1.000 | 13.856   | 0.128 | 1  | 11.1 |
| 765034022    | 4026.667 | 889.333  | 1008.218 | 0.000 | 0.466 | 1.004 | 0.999 | 24.521   | 0.002 | 2  | 22.2 |
| 765074482    | 3725.929 | 807.357  | 926.540  | 0.000 | 0.465 | 1.003 | 0.999 | 36.450   | 0.000 | 4  | 28.6 |
| 765094712    | 4709.143 | 816.786  | 915.605  | 0.000 | 0.465 | 1.010 | 0.999 | 55.685   | 0.000 | 5  | 35.7 |
| 765155402    | 4269.333 | 700.444  | 700.873  | 0.000 | 0.503 | 1.006 | 0.999 | 16.693   | 0.081 | 3  | 33.3 |
| 765195863    | 3266.000 | 711.778  | 830.537  | 0.000 | 0.458 | 1.009 | 0.998 | 35.896   | 0.000 | 2  | 22.2 |
| 765216093    | 4371.778 | 825.222  | 844.647  | 0.000 | 0.499 | 1.002 | 0.999 | 22.019   | 0.005 | 2  | 22.2 |
| 765256553    | 4984.500 | 1016.625 | 1123.483 | 0.000 | 0.469 | 1.009 | 0.999 | 35.998   | 0.000 | 3  | 37.5 |
| 765276783    | 4127.556 | 738.222  | 836.062  | 0.000 | 0.463 | 1.015 | 0.999 | 44.473   | 0.000 | 2  | 22.2 |
| 765317243    | 3326.875 | 683.500  | 807.666  | 0.000 | 0.453 | 1.007 | 0.999 | 11.566   | 0.172 | 2  | 25.0 |
| 765337473    | 3573.444 | 770.889  | 916.053  | 0.000 | 0.462 | 1.007 | 0.999 | 22.011   | 0.005 | 4  | 44.4 |
| 765377934    | 3901.000 | 785.833  | 1007.969 | 0.000 | 0.428 | 1.024 | 0.995 | 98.911   | 0.000 | 4  | 66.7 |
| 765560005    | 5103.444 | 1067.000 | 1228.285 | 0.000 | 0.462 | 1.003 | 1.000 | 7.575    | 0.577 | 3  | 33.3 |
| 809635352    | 2087.889 | 537.000  | 793.549  | 0.001 | 0.413 | 1.013 | 0.999 | 60.583   | 0.000 | 4  | 44.4 |
| 863126187    | 8190.667 | 986.556  | 908.475  | 0.000 | 0.498 | 1.002 | 0.999 | 33.606   | 0.000 | 5  | 55.6 |
| 892969023    | 1055.333 | 468.778  | 893.022  | 0.001 | 0.362 | 0.992 | 1.000 | 19.002   | 0.008 | 0  | 0.0  |
| 937495960    | 1887.667 | 543.222  | 817.130  | 0.001 | 0.400 | 1.010 | 1.000 | 153.203  | 0.000 | 2  | 22.2 |
| 953045535    | 5073.000 | 771.889  | 796.302  | 0.000 | 0.487 | 1.015 | 0.998 | 59.208   | 0.000 | 6  | 66.7 |
| 970836795    | 2564.444 | 680.667  | 1051.845 | 0.000 | 0.389 | 1.018 | 0.999 | 76.988   | 0.000 | 5  | 55.6 |
| Passing Rate |          |          |          |       |       |       |       | 13(8.9%) |       | 4  | 38.5 |

\**J*: the average number of individuals per niche (local community) in each metacommunity, *S*: the average species

numbers per niche (local community) in each metacommunity,  $\theta$ : the average fundamental biodiversity parameter per niche (local community) in each metacommunity,  $m$ : the average of the migration coefficients,  $x$ : the average of the birth to death ratio,  $\gamma$ : the average of the migration rate,  $R^2$ : the goodness-of-fitting index,  $\chi^2$ -value: the  $\chi^2$ -value of chi-squared test for observed value against predicted value,  $p$ -value for the  $\chi^2$ -test; when  $p$ -value  $> 0.05$ , the metacommunity satisfies the NNH model. The last two columns are the number and percentage of local communities (niches) that passed the local neutrality test. Note that  $R^2=1$  resulted from approximation with four effective digits only (e.g., 0.99995, exact 1 is nearly impossible to achieve).







|              |          |          |          |       |       |       |       |          |          |   |       |
|--------------|----------|----------|----------|-------|-------|-------|-------|----------|----------|---|-------|
| 764831721    | 4301.500 | 573.500  | 662.398  | 0.000 | 0.428 | 1.084 | 0.972 | 288.967  | 0.000    | 2 | 100.0 |
| 764872181    | 6134.667 | 605.000  | 1098.268 | 0.000 | 0.334 | 1.059 | 0.997 | 1417.129 | 0.000    | 3 | 100.0 |
| 764892411    | 1788.500 | 483.500  | 820.260  | 0.001 | 0.363 | 1.017 | 0.999 | 65.855   | 0.000    | 3 | 75.0  |
| 765013792    | 1674.667 | 336.333  | 615.460  | 0.001 | 0.334 | 1.053 | 0.995 | 237.602  | 0.000    | 3 | 100.0 |
| 765034022    | 1164.500 | 257.750  | 502.335  | 0.001 | 0.321 | 1.051 | 0.996 | 303.482  | 0.000    | 4 | 100.0 |
| 765074482    | 2509.000 | 560.250  | 899.946  | 0.000 | 0.374 | 1.019 | 0.999 | 90.730   | 0.000    | 4 | 100.0 |
| 765094712    | 3432.500 | 849.625  | 1362.686 | 0.000 | 0.369 | 1.031 | 0.996 | 305.975  | 0.000    | 8 | 100.0 |
| 765135172    | 2171.333 | 470.667  | 749.722  | 0.001 | 0.366 | 1.032 | 0.997 | 57.260   | 0.000    | 3 | 100.0 |
| 765155402    | 3542.200 | 687.400  | 957.399  | 0.000 | 0.408 | 1.027 | 0.998 | 122.311  | 0.000    | 4 | 80.0  |
| 765195863    | 4156.750 | 736.250  | 956.994  | 0.000 | 0.416 | 1.039 | 0.998 | 114.492  | 0.000    | 3 | 75.0  |
| 765216093    | 5212.250 | 732.500  | 920.648  | 0.000 | 0.434 | 1.021 | 0.999 | 98.294   | 0.000    | 4 | 100.0 |
| 765256553    | 5242.000 | 313.000  | 361.144  | 0.000 | 0.429 | 1.089 | 0.984 | 303.829  | 0.000    | 2 | 100.0 |
| 765276783    | 5405.000 | 773.750  | 1085.394 | 0.000 | 0.403 | 1.032 | 0.998 | 174.925  | 0.000    | 4 | 100.0 |
| 765317243    | 6064.500 | 535.000  | 640.994  | 0.000 | 0.456 | 1.026 | 0.997 | 60.191   | 0.000    | 2 | 100.0 |
| 765337473    | 4984.000 | 898.250  | 1153.631 | 0.000 | 0.431 | 1.014 | 1.000 | 39.517   | 0.000    | 2 | 50.0  |
| 765377934    | 6565.750 | 1061.000 | 1348.195 | 0.000 | 0.424 | 1.028 | 0.998 | 107.727  | 0.000    | 3 | 75.0  |
| 765398164    | 5593.500 | 526.000  | 456.615  | 0.000 | 0.539 | 1.008 | 0.999 | 9.215    | 0.418    | 0 | 0.0   |
| 765519544    | 5965.750 | 933.500  | 1164.142 | 0.000 | 0.433 | 1.022 | 0.998 | 86.139   | 0.000    | 4 | 100.0 |
| 765539774    | 3651.667 | 526.667  | 688.829  | 0.000 | 0.421 | 1.040 | 0.993 | 130.102  | 0.000    | 3 | 100.0 |
| 765560005    | 5433.833 | 826.500  | 1088.018 | 0.000 | 0.412 | 1.034 | 0.998 | 154.197  | 0.000    | 6 | 100.0 |
| 765620695    | 4423.500 | 347.500  | 445.176  | 0.000 | 0.408 | 1.070 | 0.989 | 243.669  | 0.000    | 2 | 100.0 |
| 765640925    | 7139.000 | 1043.500 | 1327.182 | 0.000 | 0.434 | 1.012 | 1.000 | 49.039   | 0.000    | 2 | 100.0 |
| 765661155    | 6054.000 | 641.500  | 897.076  | 0.000 | 0.404 | 1.029 | 0.999 | 145.822  | 0.000    | 2 | 100.0 |
| 765701615    | 8096.250 | 1018.250 | 1194.786 | 0.000 | 0.447 | 1.016 | 1.000 | 51.824   | 0.000    | 3 | 75.0  |
| 809635352    | 7933.250 | 1528.750 | 1855.781 | 0.000 | 0.446 | 1.013 | 0.999 | 42.290   | 0.000    | 2 | 50.0  |
| 823052294    | 2376.750 | 554.750  | 912.080  | 0.004 | 0.305 | 1.017 | 0.998 | 24.820   | 0.003    | 2 | 50.0  |
| 857980665    | 6727.333 | 773.000  | 1077.377 | 0.002 | 0.363 | 1.047 | 0.992 | 650.895  | 0.000    | 2 | 66.7  |
| 861967750    | 3600.000 | 654.500  | 862.361  | 0.000 | 0.419 | 1.029 | 0.998 | 103.588  | 0.000    | 2 | 50.0  |
| 863126187    | 5491.667 | 894.000  | 1411.091 | 0.000 | 0.374 | 1.035 | 0.997 | 285.500  | 0.000    | 3 | 100.0 |
| 875002022    | 1474.000 | 317.500  | 492.451  | 0.001 | 0.378 | 1.058 | 0.987 | 64.998   | 0.000    | 2 | 100.0 |
| 892969023    | 3888.500 | 685.250  | 1066.076 | 0.000 | 0.388 | 1.017 | 1.000 | 143.682  | 0.000    | 3 | 75.0  |
| 953045535    | 2720.500 | 430.750  | 640.394  | 0.001 | 0.367 | 1.052 | 0.996 | 182.713  | 0.000    | 4 | 100.0 |
| 970836795    | 3041.333 | 781.667  | 1331.485 | 0.000 | 0.363 | 1.017 | 0.999 | 109.900  | 0.000    | 3 | 100.0 |
| Passing Rate |          |          |          |       |       |       |       |          | 13(8.2%) | 3 | 74.9  |

\* $J$ : the average number of individuals per niche (local community) in each metacommunity,  $S$ : the average species numbers per niche (local community) in each metacommunity,  $\theta$ : the average fundamental biodiversity parameter per niche (local community) in each metacommunity,  $m$ : the average of the migration coefficients,  $x$ : the average of the birth to death ratio,  $\gamma$ : the average of the migration rate,  $R^2$ : the goodness-of-fitting index,  $\chi^2$ -value: the  $\chi^2$ -value of chi-squared test for observed value against predicted value,  $p$ -value for the  $\chi^2$ -test; when  $p$ -value > 0.05, the metacommunity satisfies the NNH model. The last two columns are the number and percentage of local communities (niches) that passed the local neutrality test. Note that  $R^2=1$  resulted from approximation with four effective digits only (e.g., 0.99995, exact 1 is nearly impossible to achieve).



|              |           |         |         |       |       |       |       |           |       |   |      |
|--------------|-----------|---------|---------|-------|-------|-------|-------|-----------|-------|---|------|
| 764811490    | 8479.000  | 427.000 | 294.098 | 0.000 | 0.594 | 0.999 | 0.995 | 14.411    | 0.211 | 0 | 0.0  |
| 765013792    | 4748.000  | 227.000 | 225.705 | 0.000 | 0.520 | 1.025 | 0.995 | 23.159    | 0.010 | 1 | 33.3 |
| 765034022    | 4475.500  | 173.000 | 118.765 | 0.000 | 0.570 | 1.045 | 0.944 | 24.037    | 0.008 | 1 | 50.0 |
| 765195863    | 5772.000  | 264.000 | 266.795 | 0.000 | 0.484 | 1.053 | 0.995 | 130.891   | 0.000 | 2 | 66.7 |
| 765256553    | 5461.667  | 315.667 | 284.380 | 0.000 | 0.517 | 1.017 | 0.998 | 43.776    | 0.000 | 2 | 66.7 |
| 765317243    | 6290.667  | 235.000 | 187.561 | 0.000 | 0.548 | 1.020 | 0.998 | 34.421    | 0.000 | 1 | 33.3 |
| 765337473    | 3409.667  | 81.667  | 61.359  | 0.000 | 0.572 | 1.017 | 0.985 | 49.107    | 0.000 | 1 | 33.3 |
| 809635352    | 11829.333 | 227.000 | 107.221 | 0.000 | 0.652 | 1.009 | 0.980 | 12.236    | 0.346 | 1 | 33.3 |
| 892969023    | 1944.333  | 407.667 | 375.924 | 0.001 | 0.533 | 0.976 | 0.994 | 26.268    | 0.001 | 1 | 33.3 |
| 953045535    | 6904.500  | 277.500 | 190.694 | 0.000 | 0.593 | 1.001 | 0.997 | 8.024     | 0.626 | 0 | 0.0  |
| 970836795    | 6533.000  | 263.000 | 151.913 | 0.000 | 0.641 | 0.986 | 0.988 | 8.853     | 0.451 | 0 | 0.0  |
| Passing Rate |           |         |         |       |       |       |       | 27(37.5%) |       | 1 | 35.7 |

\* $J$ : the average number of individuals per niche (local community) in each metacommunity,  $S$ : the average species numbers per niche (local community) in each metacommunity,  $\theta$ : the average fundamental biodiversity parameter per niche (local community) in each metacommunity,  $m$ : the average of the migration coefficients,  $x$ : the average of the birth to death ratio,  $\gamma$ : the average of the migration rate,  $R^2$ : the goodness-of-fitting index,  $\chi^2$ -value: the  $\chi^2$ -value of chi-squared test for observed value against predicted value,  $p$ -value for the  $\chi^2$ -test; when  $p$ -value  $>$  0.05, the metacommunity satisfies the NNH model. The last two columns are the number and percentage of local communities (niches) that passed the local neutrality test. Note that  $R^2=1$  resulted from approximation with four effective digits only (e.g., 0.99995, exact 1 is nearly impossible to achieve). See Fig 3 for an example of fitting the NNH model.





|                |           |          |          |       |       |       |       |          |       |    |       |
|----------------|-----------|----------|----------|-------|-------|-------|-------|----------|-------|----|-------|
| 764325968      | 6048.680  | 932.920  | 959.510  | 0.000 | 0.488 | 1.007 | 0.999 | 61.084   | 0.000 | 11 | 44.0  |
| 764346198      | 3982.448  | 584.793  | 679.340  | 0.000 | 0.471 | 1.009 | 1.000 | 309.012  | 0.000 | 15 | 51.7  |
| 764366428      | 4487.800  | 476.067  | 533.164  | 0.001 | 0.442 | 1.047 | 0.998 | 426.162  | 0.000 | 11 | 73.3  |
| 764447348      | 4096.269  | 590.962  | 634.328  | 0.001 | 0.475 | 1.009 | 0.999 | 85.207   | 0.000 | 12 | 46.2  |
| 764467579      | 4336.400  | 644.320  | 767.960  | 0.000 | 0.465 | 1.015 | 1.000 | 218.667  | 0.000 | 13 | 52.0  |
| 764487809      | 5337.037  | 755.926  | 826.091  | 0.000 | 0.466 | 1.012 | 1.000 | 51.463   | 0.000 | 12 | 44.4  |
| 764508039      | 6627.929  | 717.643  | 815.001  | 0.000 | 0.457 | 1.015 | 0.999 | 52.692   | 0.000 | 5  | 35.7  |
| 764588959      | 3944.438  | 536.188  | 572.497  | 0.001 | 0.482 | 1.012 | 0.998 | 32.146   | 0.000 | 6  | 37.5  |
| 764649650      | 3984.500  | 649.056  | 775.981  | 0.000 | 0.453 | 1.015 | 0.999 | 103.596  | 0.000 | 11 | 61.1  |
| 764669880      | 4086.786  | 802.607  | 1006.137 | 0.000 | 0.437 | 1.013 | 1.000 | 153.600  | 0.000 | 16 | 57.1  |
| 764710340      | 3035.500  | 222.625  | 216.167  | 0.001 | 0.528 | 1.012 | 0.995 | 26.854   | 0.003 | 5  | 62.5  |
| 764750800      | 5174.286  | 973.500  | 1233.578 | 0.000 | 0.435 | 1.010 | 0.999 | 144.569  | 0.000 | 6  | 42.9  |
| 764811490      | 6769.765  | 801.882  | 896.951  | 0.000 | 0.491 | 1.009 | 0.999 | 41.643   | 0.000 | 7  | 41.2  |
| 764831721      | 4451.462  | 879.000  | 1110.755 | 0.000 | 0.435 | 1.017 | 0.999 | 97.348   | 0.000 | 5  | 38.5  |
| 764872181      | 4615.786  | 758.429  | 900.532  | 0.000 | 0.460 | 1.014 | 0.999 | 675.609  | 0.000 | 4  | 28.6  |
| 764892411      | 3396.200  | 751.333  | 922.326  | 0.000 | 0.441 | 1.009 | 0.999 | 42.748   | 0.000 | 6  | 40.0  |
| 764953101      | 4569.000  | 889.333  | 1132.786 | 0.000 | 0.435 | 1.017 | 0.999 | 116.747  | 0.000 | 6  | 50.0  |
| 765013792      | 3584.294  | 621.294  | 771.243  | 0.000 | 0.449 | 1.016 | 1.000 | 46.205   | 0.000 | 6  | 35.3  |
| 765034022      | 3548.294  | 610.647  | 741.519  | 0.000 | 0.445 | 1.024 | 0.999 | 73.042   | 0.000 | 8  | 47.1  |
| 765074482      | 3701.500  | 721.636  | 848.931  | 0.000 | 0.454 | 1.008 | 1.000 | 41.406   | 0.000 | 9  | 40.9  |
| 765094712      | 4350.500  | 806.917  | 1040.242 | 0.000 | 0.434 | 1.019 | 0.998 | 204.388  | 0.000 | 14 | 58.3  |
| 765135172      | 2171.333  | 470.667  | 749.722  | 0.001 | 0.366 | 1.032 | 0.997 | 57.260   | 0.000 | 3  | 100.0 |
| 765155402      | 3940.500  | 705.750  | 800.231  | 0.000 | 0.470 | 1.012 | 0.999 | 43.356   | 0.000 | 7  | 43.8  |
| 765195863      | 4010.944  | 649.833  | 765.138  | 0.000 | 0.458 | 1.022 | 0.999 | 169.609  | 0.000 | 8  | 44.4  |
| 765216093      | 4528.267  | 779.400  | 850.444  | 0.000 | 0.480 | 1.007 | 1.000 | 43.412   | 0.000 | 6  | 40.0  |
| 765256553      | 5034.429  | 748.357  | 809.709  | 0.000 | 0.476 | 1.021 | 0.999 | 74.962   | 0.000 | 7  | 50.0  |
| 765276783      | 4353.867  | 722.000  | 879.145  | 0.000 | 0.445 | 1.019 | 0.999 | 151.552  | 0.000 | 7  | 46.7  |
| 765317243      | 4394.143  | 562.929  | 636.450  | 0.000 | 0.479 | 1.012 | 1.000 | 65.533   | 0.000 | 5  | 35.7  |
| 765337473      | 3898.722  | 668.889  | 812.135  | 0.000 | 0.471 | 1.013 | 0.999 | 101.182  | 0.000 | 9  | 50.0  |
| 765377934      | 4966.900  | 895.900  | 1144.060 | 0.000 | 0.426 | 1.026 | 0.997 | 188.363  | 0.000 | 7  | 70.0  |
| 765398164      | 5593.500  | 526.000  | 456.615  | 0.000 | 0.539 | 1.008 | 0.999 | 9.215    | 0.418 | 0  | 0.0   |
| 765519544      | 5965.750  | 933.500  | 1164.142 | 0.000 | 0.433 | 1.022 | 0.998 | 86.139   | 0.000 | 4  | 100.0 |
| 765539774      | 3651.667  | 526.667  | 688.829  | 0.000 | 0.421 | 1.040 | 0.993 | 130.102  | 0.000 | 3  | 100.0 |
| 765560005      | 5027.375  | 954.625  | 1182.247 | 0.000 | 0.436 | 1.016 | 0.999 | 87.492   | 0.000 | 10 | 62.5  |
| 765620695      | 4423.500  | 347.500  | 445.176  | 0.000 | 0.408 | 1.070 | 0.989 | 243.669  | 0.000 | 2  | 100.0 |
| 765640925      | 7139.000  | 1043.500 | 1327.182 | 0.000 | 0.434 | 1.012 | 1.000 | 49.039   | 0.000 | 2  | 100.0 |
| 765661155      | 6054.000  | 641.500  | 897.076  | 0.000 | 0.404 | 1.029 | 0.999 | 145.822  | 0.000 | 2  | 100.0 |
| 765701615      | 8096.250  | 1018.250 | 1194.786 | 0.000 | 0.447 | 1.016 | 1.000 | 51.824   | 0.000 | 3  | 75.0  |
| 809635352      | 5138.056  | 730.833  | 928.697  | 0.000 | 0.466 | 1.010 | 0.999 | 58.642   | 0.000 | 7  | 38.9  |
| 823052294      | 2376.750  | 554.750  | 912.080  | 0.004 | 0.305 | 1.017 | 0.998 | 24.820   | 0.003 | 2  | 50.0  |
| 857980665      | 5607.250  | 723.000  | 950.056  | 0.002 | 0.399 | 1.031 | 0.995 | 392.327  | 0.000 | 2  | 50.0  |
| 861967750      | 3600.000  | 654.500  | 862.361  | 0.000 | 0.419 | 1.029 | 0.998 | 103.588  | 0.000 | 2  | 50.0  |
| 863126187      | 7000.154  | 932.615  | 1105.728 | 0.000 | 0.448 | 1.008 | 0.999 | 118.396  | 0.000 | 8  | 61.5  |
| 875002022      | 3632.000  | 353.500  | 452.360  | 0.000 | 0.453 | 1.037 | 0.997 | 41.479   | 0.000 | 3  | 75.0  |
| 892969023      | 1878.176  | 498.235  | 805.060  | 0.001 | 0.409 | 0.994 | 1.000 | 97.975   | 0.000 | 4  | 23.5  |
| 901775393      | 5027.000  | 558.000  | 517.766  | 0.000 | 0.549 | 0.996 | 0.997 | 15.082   | 0.058 | 2  | 100.0 |
| 937495960      | 2651.583  | 598.333  | 831.509  | 0.000 | 0.421 | 1.010 | 1.000 | 24.178   | 0.004 | 3  | 25.0  |
| 938202701      | 11850.000 | 802.000  | 999.507  | 0.000 | 0.426 | 1.042 | 0.995 | 163.100  | 0.000 | 1  | 100.0 |
| 953045535      | 4506.063  | 609.250  | 675.959  | 0.001 | 0.466 | 1.022 | 0.998 | 156.820  | 0.000 | 10 | 62.5  |
| 964271349      | 228.000   | 35.000   | 116.801  | 0.006 | 0.170 | 1.284 | 0.952 | 1462.212 | 0.000 | 1  | 100.0 |
| 970836795      | 3266.250  | 659.000  | 989.281  | 0.000 | 0.425 | 1.012 | 0.999 | 84.582   | 0.000 | 9  | 56.3  |
| Passing Rate % |           |          |          |       |       |       |       | 9(5.2%)  |       | 8  | 51.0  |

\* $J$ : the average number of individuals per niche (local community) in each metacommunity,  $S$ : the average species numbers per niche (local community) in each metacommunity,  $\theta$ : the average fundamental biodiversity parameter per niche (local community) in each metacommunity,  $m$ : the average of the migration coefficients,  $x$ : the average of the birth to death ratio,  $\gamma$ : the average of the migration rate,  $R^2$ : the goodness-of-fitting index,  $\chi^2$ -value: the  $\chi^2$ -value of chi-squared test for observed value against predicted value,  $p$ -value for the  $\chi^2$ -test; when  $p$ -value > 0.05, the metacommunity satisfies the NNH model. The last two columns are the number and percentage of local communities (niches) that passed the local neutrality test. Note that  $R^2=1$  resulted from approximation with four effective digits only (e.g., 0.99995, exact 1 is nearly impossible to achieve). See Fig 3 for an example of fitting the NNH model.

**Table S13.** Test results of fitting NNH (multi-site neutral) model to Gut datasets (*Sites=7*, *Subjects=11*)

| Group ID     | $J$      | $S$     | $\theta$ | $m$   | $x$   | $\gamma$ | $R^2$ | $\chi^2$ | $p$ -value | $N_{pass}$ | $\%_{(pass)}$ |
|--------------|----------|---------|----------|-------|-------|----------|-------|----------|------------|------------|---------------|
| S400         | 3630.571 | 583.143 | 557.865  | 0.000 | 0.513 | 0.998    | 1.000 | 6.383    | 0.701      | 0          | 0.0           |
| S401         | 3863.857 | 686.429 | 602.807  | 0.000 | 0.538 | 0.988    | 0.995 | 45.244   | 0.000      | 2          | 28.6          |
| S402         | 3873.000 | 716.714 | 674.731  | 0.000 | 0.521 | 0.994    | 0.999 | 22.312   | 0.004      | 0          | 0.0           |
| S403         | 4190.143 | 827.429 | 837.208  | 0.000 | 0.499 | 0.993    | 0.999 | 11.252   | 0.188      | 1          | 14.3          |
| S404         | 4276.286 | 672.571 | 632.176  | 0.000 | 0.519 | 0.999    | 1.000 | 5.554    | 0.697      | 0          | 0.0           |
| S405         | 4462.429 | 780.000 | 781.444  | 0.000 | 0.498 | 0.997    | 1.000 | 11.017   | 0.275      | 1          | 14.3          |
| S406         | 5326.429 | 636.286 | 593.949  | 0.000 | 0.513 | 1.006    | 1.000 | 19.805   | 0.031      | 4          | 57.1          |
| S407         | 1223.000 | 332.286 | 299.728  | 0.001 | 0.543 | 0.967    | 0.993 | 38.469   | 0.000      | 3          | 42.9          |
| S408         | 3776.571 | 741.286 | 828.736  | 0.000 | 0.470 | 1.009    | 0.999 | 45.457   | 0.000      | 2          | 28.6          |
| S409         | 1807.714 | 529.143 | 643.545  | 0.001 | 0.474 | 0.976    | 0.996 | 59.115   | 0.000      | 3          | 42.9          |
| S410         | 1803.143 | 634.571 | 748.939  | 0.001 | 0.473 | 0.971    | 0.997 | 46.542   | 0.000      | 3          | 42.9          |
| Passing Rate |          |         |          |       |       |          |       |          |            | 4(36.4%)   | 24.7          |

\* $J$ : the average number of individuals per niche (local community) in each metacommunity,  $S$ : the average species numbers per niche (local community) in each metacommunity,  $\theta$ : the average fundamental biodiversity parameter per niche (local community) in each metacommunity,  $m$ : the average of the migration coefficients,  $x$ : the average of the birth to death ratio,  $\gamma$ : the average of the migration rate,  $R^2$ : the goodness-of-fitting index,  $\chi^2$ -value: the  $\chi^2$ -value of chi-squared test for observed value against predicted value,  $p$ -value for the  $\chi^2$ -test; when  $p$ -value  $> 0.05$ , the metacommunity satisfies the NNH model. The last two columns are the number and percentage of local communities (niches) that passed the local neutrality test. Note that  $R^2=1$  resulted from approximation with four effective digits only (e.g., 0.99995, exact 1 is nearly impossible to achieve). See Fig 3 for an example of fitting the NNH model.



**Table S14.** Test results of fitting NNH (multi-site neutral) model to Lung datasets (*Sites=4*, *Subjects=139*)

| Group ID | $J$  | $S$    | $\theta$ | $m$   | $x$   | $\gamma$ | $R^2$ | $\chi^2$  | $p$ -value | $N_{pass}$ | % <sub>(pass)</sub> |
|----------|------|--------|----------|-------|-------|----------|-------|-----------|------------|------------|---------------------|
| A1       | 1666 | 27.000 | 9.935    | 0.000 | 0.856 | 0.738    | 0.959 | 5.077     | 0.828      | 0          | 0.0                 |
| A2       | 1666 | 34.667 | 21.489   | 0.001 | 0.668 | 0.957    | 0.949 | 14.136    | 0.118      | 1          | 33.3                |
| A3       | 1666 | 51.000 | 31.833   | 0.001 | 0.653 | 0.966    | 0.989 | 22.149    | 0.014      | 1          | 25.0                |
| A4       | 1666 | 33.250 | 20.395   | 0.001 | 0.610 | 0.979    | 0.957 | 91.916    | 0.000      | 3          | 75.0                |
| A5       | 1666 | 44.750 | 30.621   | 0.001 | 0.562 | 1.089    | 0.922 | 85.178    | 0.000      | 3          | 75.0                |
| A6       | 1666 | 47.000 | 31.144   | 0.001 | 0.681 | 0.916    | 0.988 | 7.975     | 0.631      | 1          | 33.3                |
| A7       | 1666 | 54.500 | 36.638   | 0.001 | 0.590 | 1.027    | 0.991 | 32.719    | 0.000      | 2          | 50.0                |
| A8       | 1666 | 77.250 | 43.711   | 0.001 | 0.642 | 1.002    | 0.985 | 9.408     | 0.400      | 1          | 25.0                |
| A9       | 1666 | 51.500 | 29.486   | 0.001 | 0.643 | 0.983    | 0.960 | 829022.97 | 0.000      | 1          | 25.0                |
| A10      | 1666 | 66.500 | 37.464   | 0.001 | 0.639 | 0.984    | 0.972 | 24.824    | 0.006      | 1          | 25.0                |
| A11      | 1666 | 24.000 | 15.072   | 0.001 | 0.628 | 0.973    | 0.950 | 10.769    | 0.096      | 0          | 0.0                 |
| A12      | 1666 | 50.750 | 24.575   | 0.001 | 0.692 | 0.961    | 0.969 | 14.465    | 0.153      | 0          | 0.0                 |
| A13      | 1666 | 45.500 | 33.243   | 0.001 | 0.615 | 0.969    | 0.972 | 63.277    | 0.000      | 3          | 75.0                |
| A14      | 1666 | 62.500 | 26.636   | 0.001 | 0.719 | 0.938    | 0.972 | 5.673     | 0.578      | 1          | 25.0                |
| A15      | 1666 | 55.667 | 26.785   | 0.001 | 0.693 | 0.971    | 0.940 | 11.467    | 0.322      | 0          | 0.0                 |
| A16      | 1666 | 43.333 | 23.533   | 0.001 | 0.648 | 0.996    | 0.964 | 37.162    | 0.000      | 2          | 66.7                |
| A17      | 1666 | 61.000 | 37.740   | 0.001 | 0.651 | 0.990    | 0.978 | 17.242    | 0.045      | 0          | 0.0                 |
| A18      | 1666 | 60.250 | 31.847   | 0.001 | 0.660 | 1.005    | 0.986 | 6.302     | 0.709      | 0          | 0.0                 |
| A19      | 1666 | 59.750 | 34.856   | 0.001 | 0.598 | 1.018    | 0.989 | 890.732   | 0.000      | 1          | 25.0                |
| A20      | 1666 | 83.500 | 48.477   | 0.001 | 0.642 | 0.994    | 0.987 | 10.829    | 0.288      | 1          | 25.0                |
| A21      | 1666 | 28.000 | 22.134   | 0.001 | 0.648 | 0.924    | 0.983 | 35.293    | 0.000      | 1          | 25.0                |
| A22      | 1666 | 47.333 | 31.301   | 0.001 | 0.532 | 1.172    | 0.885 | 113.656   | 0.000      | 3          | 100.0               |
| A23      | 1666 | 57.750 | 31.832   | 0.001 | 0.670 | 0.967    | 0.981 | 9.803     | 0.458      | 0          | 0.0                 |
| A24      | 1666 | 36.750 | 25.710   | 0.001 | 0.622 | 0.982    | 0.987 | 21.052    | 0.007      | 2          | 50.0                |
| A25      | 1666 | 33.500 | 23.384   | 0.001 | 0.649 | 0.987    | 0.973 | 66.063    | 0.000      | 1          | 50.0                |
| A26      | 1666 | 56.250 | 37.154   | 0.001 | 0.566 | 1.089    | 0.947 | 58.184    | 0.000      | 3          | 75.0                |
| A27      | 1666 | 51.250 | 27.587   | 0.001 | 0.676 | 0.983    | 0.980 | 12.315    | 0.264      | 1          | 25.0                |
| A28      | 1666 | 95.250 | 57.935   | 0.001 | 0.609 | 0.983    | 0.991 | 1107.891  | 0.000      | 1          | 25.0                |
| A29      | 1666 | 51.000 | 29.063   | 0.001 | 0.647 | 0.996    | 0.881 | 50.015    | 0.000      | 3          | 100.0               |
| A30      | 1666 | 68.000 | 37.347   | 0.001 | 0.668 | 0.961    | 0.992 | 9.072     | 0.525      | 0          | 0.0                 |
| A31      | 1666 | 26.750 | 9.490    | 0.000 | 0.854 | 0.754    | 0.952 | 3.918     | 0.951      | 0          | 0.0                 |
| A32      | 1666 | 73.250 | 34.847   | 0.001 | 0.671 | 0.939    | 0.944 | 181.826   | 0.000      | 2          | 50.0                |
| A33      | 1666 | 46.500 | 18.141   | 0.001 | 0.761 | 0.919    | 0.955 | 8.343     | 0.595      | 1          | 25.0                |
| A35      | 1666 | 51.500 | 42.502   | 0.001 | 0.529 | 1.072    | 0.989 | 27.275    | 0.001      | 2          | 50.0                |
| A36      | 1666 | 20.000 | 1.267    | 0.001 | 0.731 | 2.225    | 0.152 | 3.379     | 0.908      | 0          | 0.0                 |
| A37      | 1666 | 18.000 | 5.170    | 0.001 | 0.802 | 1.330    | 0.980 | 1.019     | 0.999      | 0          | 0.0                 |
| A38      | 1666 | 37.000 | 28.160   | 0.001 | 0.560 | 1.084    | 0.944 | 152.210   | 0.000      | 2          | 66.7                |
| A39      | 1666 | 30.333 | 17.865   | 0.001 | 0.605 | 1.069    | 0.927 | 76.851    | 0.000      | 2          | 66.7                |
| A40      | 1666 | 45.667 | 19.334   | 0.001 | 0.724 | 0.957    | 0.974 | 5.099     | 0.826      | 0          | 0.0                 |
| A41      | 1666 | 44.000 | 15.745   | 0.001 | 0.814 | 0.843    | 0.941 | 4.227     | 0.836      | 0          | 0.0                 |
| A42      | 1666 | 36.333 | 18.305   | 0.001 | 0.635 | 1.072    | 0.864 | 53.877    | 0.000      | 2          | 66.7                |
| A43      | 1666 | 29.667 | 20.877   | 0.001 | 0.623 | 0.984    | 0.922 | 46.201    | 0.000      | 2          | 66.7                |
| A44      | 1666 | 86.667 | 42.125   | 0.001 | 0.681 | 0.971    | 0.979 | 8.379     | 0.496      | 0          | 0.0                 |
| A45      | 1666 | 63.000 | 37.667   | 0.001 | 0.610 | 0.998    | 0.990 | 7.424     | 0.593      | 1          | 33.3                |
| A46      | 1666 | 30.667 | 15.907   | 0.001 | 0.728 | 0.870    | 0.929 | 10.427    | 0.236      | 0          | 0.0                 |
| A47      | 1666 | 17.500 | 17.755   | 0.001 | 0.447 | 1.113    | 0.958 | 636.512   | 0.000      | 2          | 100.0               |
| A48      | 1666 | 24.667 | 29.853   | 0.001 | 0.454 | 1.057    | 0.968 | 455.113   | 0.000      | 3          | 100.0               |

|      |      |         |         |       |       |       |       |           |       |   |       |
|------|------|---------|---------|-------|-------|-------|-------|-----------|-------|---|-------|
| A49  | 1666 | 56.667  | 34.603  | 0.001 | 0.631 | 0.967 | 0.949 | 40.569    | 0.000 | 1 | 33.3  |
| A50  | 1666 | 87.000  | 61.353  | 0.001 | 0.567 | 1.042 | 0.980 | 18.530    | 0.018 | 1 | 50.0  |
| A51  | 1666 | 39.000  | 22.633  | 0.001 | 0.710 | 0.880 | 0.926 | 37.667    | 0.000 | 2 | 100.0 |
| A52  | 1666 | 54.333  | 24.848  | 0.001 | 0.695 | 0.981 | 0.962 | 7.221     | 0.614 | 0 | 0.0   |
| A53  | 1666 | 38.000  | 36.513  | 0.001 | 0.451 | 1.149 | 0.982 | 563.505   | 0.000 | 3 | 100.0 |
| A54  | 1666 | 56.000  | 24.778  | 0.001 | 0.703 | 0.981 | 0.944 | 7.082     | 0.629 | 0 | 0.0   |
| A55  | 1666 | 32.000  | 18.439  | 0.001 | 0.646 | 0.974 | 0.915 | 164.501   | 0.000 | 1 | 50.0  |
| A56  | 1666 | 100.667 | 50.200  | 0.001 | 0.702 | 0.947 | 0.948 | 9.905     | 0.358 | 0 | 0.0   |
| A57  | 1666 | 53.500  | 33.437  | 0.001 | 0.667 | 0.946 | 0.918 | 14.910    | 0.093 | 0 | 0.0   |
| A58  | 1666 | 35.000  | 13.257  | 0.001 | 0.805 | 0.859 | 0.916 | 3.954     | 0.914 | 0 | 0.0   |
| A59  | 1666 | 57.000  | 39.550  | 0.001 | 0.555 | 1.002 | 0.983 | 116.453   | 0.000 | 1 | 50.0  |
| A60  | 1666 | 50.667  | 28.901  | 0.001 | 0.658 | 0.988 | 0.979 | 8.870     | 0.545 | 0 | 0.0   |
| A61  | 1666 | 36.000  | 30.354  | 0.001 | 0.487 | 1.092 | 0.991 | 147.289   | 0.000 | 2 | 100.0 |
| A62  | 1666 | 24.333  | 22.864  | 0.001 | 0.558 | 1.059 | 0.970 | 5761.735  | 0.000 | 2 | 66.7  |
| A63  | 1666 | 41.000  | 28.547  | 0.001 | 0.677 | 0.969 | 0.946 | 13.408    | 0.202 | 1 | 33.3  |
| A64  | 1666 | 52.667  | 25.209  | 0.001 | 0.694 | 0.970 | 0.945 | 15.587    | 0.076 | 0 | 0.0   |
| A65  | 1666 | 88.333  | 47.019  | 0.001 | 0.658 | 0.986 | 0.983 | 5.761     | 0.764 | 0 | 0.0   |
| A66  | 1666 | 61.333  | 31.859  | 0.001 | 0.669 | 0.978 | 0.975 | 11.272    | 0.258 | 0 | 0.0   |
| A67  | 1666 | 102.000 | 56.597  | 0.001 | 0.638 | 1.004 | 0.997 | 2.785     | 0.947 | 1 | 33.3  |
| A68  | 1666 | 30.333  | 11.830  | 0.000 | 0.813 | 0.818 | 0.944 | 4.239     | 0.936 | 0 | 0.0   |
| A70  | 1666 | 61.333  | 51.623  | 0.001 | 0.511 | 1.085 | 0.981 | 38.502    | 0.000 | 2 | 66.7  |
| A71  | 1666 | 69.667  | 59.087  | 0.001 | 0.532 | 1.031 | 0.966 | 38.605    | 0.000 | 2 | 66.7  |
| A72  | 1666 | 13.333  | 22.616  | 0.001 | 0.271 | 1.349 | 0.930 | 95625.340 | 0.000 | 3 | 100.0 |
| A73  | 1666 | 44.000  | 21.943  | 0.001 | 0.725 | 0.915 | 0.978 | 4.128     | 0.903 | 0 | 0.0   |
| A75  | 1666 | 33.667  | 20.721  | 0.001 | 0.652 | 0.990 | 0.968 | 21.986    | 0.015 | 1 | 33.3  |
| A77  | 1666 | 55.667  | 46.325  | 0.001 | 0.506 | 1.149 | 0.959 | 58.241    | 0.000 | 2 | 66.7  |
| A78  | 1666 | 38.500  | 16.376  | 0.001 | 0.737 | 0.945 | 0.928 | 6.567     | 0.682 | 0 | 0.0   |
| A79  | 1666 | 52.000  | 31.743  | 0.001 | 0.582 | 1.082 | 0.864 | 27.517    | 0.001 | 1 | 100.0 |
| A80  | 1666 | 40.000  | 17.565  | 0.001 | 0.747 | 0.911 | 0.958 | 8.371     | 0.593 | 0 | 0.0   |
| A81  | 1666 | 41.000  | 30.202  | 0.001 | 0.568 | 1.089 | 0.984 | 17.346    | 0.067 | 1 | 33.3  |
| A82  | 1666 | 44.000  | 27.460  | 0.001 | 0.652 | 0.922 | 0.960 | 10.037    | 0.262 | 1 | 33.3  |
| A83  | 1666 | 57.000  | 37.156  | 0.001 | 0.613 | 1.002 | 0.961 | 11.365    | 0.252 | 2 | 66.7  |
| A84  | 1666 | 70.333  | 53.917  | 0.001 | 0.567 | 1.058 | 0.975 | 120.804   | 0.000 | 1 | 33.3  |
| A85  | 1666 | 37.333  | 18.353  | 0.001 | 0.734 | 0.929 | 0.985 | 6.765     | 0.747 | 0 | 0.0   |
| A86  | 1666 | 25.500  | 12.265  | 0.001 | 0.730 | 0.903 | 0.957 | 6.193     | 0.720 | 0 | 0.0   |
| A87  | 1666 | 54.333  | 22.795  | 0.001 | 0.725 | 0.953 | 0.914 | 17.843    | 0.037 | 0 | 0.0   |
| A88  | 1666 | 45.000  | 43.593  | 0.001 | 0.481 | 1.085 | 0.984 | 136.317   | 0.000 | 2 | 100.0 |
| A89  | 1666 | 35.000  | 17.217  | 0.001 | 0.733 | 0.898 | 0.947 | 6.498     | 0.772 | 0 | 0.0   |
| A90  | 1666 | 70.667  | 35.368  | 0.001 | 0.689 | 0.979 | 0.972 | 7.258     | 0.610 | 0 | 0.0   |
| A91  | 1666 | 50.000  | 27.722  | 0.000 | 0.796 | 0.816 | 0.977 | 3.003     | 0.981 | 0 | 0.0   |
| A92  | 1666 | 58.000  | 26.589  | 0.001 | 0.736 | 0.923 | 0.941 | 8.129     | 0.521 | 0 | 0.0   |
| A93  | 1666 | 44.667  | 23.060  | 0.001 | 0.636 | 1.056 | 0.885 | 42.580    | 0.000 | 2 | 66.7  |
| A94  | 1666 | 38.667  | 16.571  | 0.001 | 0.746 | 0.911 | 0.959 | 5.780     | 0.833 | 0 | 0.0   |
| A95  | 1666 | 26.500  | 136.961 | 0.001 | 0.328 | 1.153 | 0.984 | 19449370. | 0.000 | 2 | 100.0 |
| A96  | 1666 | 53.000  | 34.189  | 0.001 | 0.589 | 1.013 | 0.970 | 1259.071  | 0.000 | 1 | 33.3  |
| A97  | 1666 | 67.000  | 32.733  | 0.001 | 0.709 | 0.946 | 0.982 | 3.055     | 0.962 | 0 | 0.0   |
| A98  | 1666 | 11.000  | 0.575   | 0.001 | 0.732 | 2.472 | 0.570 | 0.510     | 0.998 | 0 | 0.0   |
| A99  | 1666 | 24.000  | 11.465  | 0.001 | 0.761 | 0.849 | 0.884 | 11.850    | 0.158 | 1 | 50.0  |
| A100 | 1666 | 40.500  | 23.440  | 0.001 | 0.645 | 0.980 | 0.984 | 12.890    | 0.168 | 0 | 0.0   |
| A101 | 1666 | 39.000  | 33.481  | 0.001 | 0.480 | 1.159 | 0.927 | 155.152   | 0.000 | 2 | 100.0 |
| A102 | 1666 | 44.333  | 18.727  | 0.001 | 0.797 | 0.849 | 0.957 | 4.207     | 0.938 | 0 | 0.0   |

|              |      |        |        |       |       |       |       |           |       |            |       |      |
|--------------|------|--------|--------|-------|-------|-------|-------|-----------|-------|------------|-------|------|
| A103         | 1666 | 51.333 | 37.302 | 0.001 | 0.621 | 0.958 | 0.979 | 25.658    | 0.002 | 1          | 33.3  |      |
| A104         | 1666 | 17.000 | 1.523  | 0.001 | 0.687 | 2.254 | 0.244 | 5.851     | 0.557 | 0          | 0.0   |      |
| A105         | 1666 | 75.667 | 41.422 | 0.001 | 0.638 | 1.010 | 0.996 | 4.237     | 0.895 | 1          | 33.3  |      |
| A106         | 1666 | 26.000 | 8.600  | 0.001 | 0.796 | 0.901 | 0.889 | 4.865     | 0.900 | 0          | 0.0   |      |
| A107         | 1666 | 76.667 | 30.600 | 0.001 | 0.755 | 0.929 | 0.983 | 4.315     | 0.890 | 0          | 0.0   |      |
| A108         | 1666 | 35.667 | 13.688 | 0.001 | 0.748 | 0.943 | 0.987 | 3.040     | 0.963 | 0          | 0.0   |      |
| A109         | 1666 | 35.667 | 17.590 | 0.001 | 0.695 | 0.984 | 0.913 | 11.780    | 0.226 | 0          | 0.0   |      |
| A110         | 1666 | 8.000  | 7.431  | 0.000 | 0.738 | 0.670 | 0.924 | 6.716     | 0.082 | 0          | 0.0   |      |
| A111         | 1666 | 29.000 | 18.487 | 0.001 | 0.593 | 1.053 | 0.928 | 42.357    | 0.000 | 2          | 100.0 |      |
| R01          | 1666 | 34.000 | 25.904 | 0.001 | 0.634 | 0.919 | 0.958 | 14.500    | 0.106 | 0          | 0.0   |      |
| R02          | 1666 | 65.333 | 40.360 | 0.001 | 0.626 | 0.994 | 0.959 | 29.608    | 0.001 | 1          | 33.3  |      |
| R03          | 1666 | 33.750 | 30.789 | 0.001 | 0.518 | 1.033 | 0.992 | 25.306    | 0.005 | 3          | 75.0  |      |
| R04          | 1666 | 53.500 | 34.446 | 0.001 | 0.603 | 1.036 | 0.989 | 21.124    | 0.020 | 1          | 25.0  |      |
| R05          | 1666 | 18.667 | 5.908  | 0.001 | 0.784 | 1.126 | 0.858 | 5.643     | 0.775 | 1          | 33.3  |      |
| R06          | 1666 | 12.500 | 15.294 | 0.001 | 0.392 | 1.173 | 0.830 | 2122.417  | 0.000 | 2          | 100.0 |      |
| R07          | 1666 | 34.000 | 18.398 | 0.001 | 0.693 | 0.947 | 0.982 | 5.311     | 0.869 | 1          | 33.3  |      |
| R08          | 1666 | 32.250 | 22.132 | 0.001 | 0.603 | 0.980 | 0.981 | 36.328    | 0.000 | 1          | 25.0  |      |
| R09          | 1666 | 60.000 | 27.958 | 0.001 | 0.689 | 0.988 | 0.937 | 12.134    | 0.206 | 0          | 0.0   |      |
| R10          | 1666 | 49.000 | 48.358 | 0.001 | 0.469 | 1.106 | 0.972 | 235.878   | 0.000 | 3          | 75.0  |      |
| R11          | 1666 | 95.000 | 52.945 | 0.001 | 0.646 | 0.997 | 0.990 | 6.364     | 0.607 | 1          | 25.0  |      |
| R12          | 1666 | 58.333 | 34.680 | 0.001 | 0.631 | 1.015 | 0.960 | 16.610    | 0.055 | 1          | 33.3  |      |
| R13          | 1666 | 22.000 | 12.950 | 0.001 | 0.604 | 1.693 | 0.971 | 6.557     | 0.476 | 1          | 33.3  |      |
| R14          | 1666 | 58.000 | 30.183 | 0.000 | 0.766 | 0.788 | 0.832 | 17.668    | 0.039 | 0          | 0.0   |      |
| R15          | 1666 | 67.750 | 40.194 | 0.001 | 0.626 | 1.019 | 0.972 | 9.928     | 0.356 | 2          | 50.0  |      |
| R16          | 1666 | 38.667 | 21.369 | 0.001 | 0.690 | 0.942 | 0.956 | 8.901     | 0.446 | 0          | 0.0   |      |
| R17          | 1666 | 51.750 | 30.541 | 0.001 | 0.640 | 1.036 | 0.975 | 472.964   | 0.000 | 2          | 50.0  |      |
| R18          | 1666 | 65.250 | 34.091 | 0.001 | 0.651 | 1.010 | 0.989 | 8.815     | 0.454 | 1          | 25.0  |      |
| R19          | 1666 | 62.750 | 44.632 | 0.001 | 0.557 | 1.054 | 0.974 | 68.481    | 0.000 | 2          | 50.0  |      |
| R20          | 1666 | 31.667 | 23.630 | 0.001 | 0.551 | 1.003 | 0.970 | 38.187    | 0.000 | 2          | 66.7  |      |
| R22          | 1666 | 50.000 | 28.040 | 0.001 | 0.671 | 0.957 | 0.989 | 14.001    | 0.173 | 1          | 25.0  |      |
| R24          | 1666 | 53.500 | 32.307 | 0.001 | 0.623 | 1.015 | 0.971 | 42.024    | 0.000 | 1          | 25.0  |      |
| R25          | 1666 | 99.750 | 55.661 | 0.001 | 0.667 | 0.973 | 0.988 | 4.392     | 0.884 | 0          | 0.0   |      |
| R26          | 1666 | 39.500 | 61.892 | 0.001 | 0.371 | 1.121 | 0.994 | 3874889.0 | 0.000 | 3          | 75.0  |      |
| R27          | 1666 | 59.750 | 39.194 | 0.001 | 0.675 | 0.931 | 0.995 | 10.183    | 0.425 | 1          | 25.0  |      |
| R28          | 1666 | 36.500 | 15.130 | 0.001 | 0.684 | 1.315 | 0.927 | 54.675    | 0.000 | 1          | 25.0  |      |
| R29          | 1666 | 65.750 | 42.636 | 0.001 | 0.602 | 1.012 | 0.980 | 23.293    | 0.003 | 0          | 0.0   |      |
| R30          | 1666 | 60.667 | 39.076 | 0.001 | 0.593 | 1.040 | 0.987 | 19.741    | 0.020 | 1          | 33.3  |      |
| Passing Rate |      |        |        |       |       |       |       |           |       | 72 (53.3%) | 1     | 32.6 |

\* $J$ : the average number of individuals per niche (local community) in each metacommunity,  $S$ : the average species numbers per niche (local community) in each metacommunity,  $\theta$ : the average fundamental biodiversity parameter per niche (local community) in each metacommunity,  $m$ : the average of the migration coefficients,  $x$ : the average of the birth to death ratio,  $\gamma$ : the average of the migration rate,  $R^2$ : the goodness-of-fitting index,  $\chi^2$ -value: the  $\chi^2$ -value of chi-squared test for observed value against predicted value,  $p$ -value for the  $\chi^2$ -test; when  $p$ -value  $>$  0.05, the metacommunity satisfies the NNH model. The last two columns are the number and percentage of local communities (niches) that passed the local neutrality test. Note that  $R^2=1$  resulted from approximation with four effective digits only (e.g., 0.99995, exact 1 is nearly impossible to achieve). See Fig 3 for an example of fitting the NNH model.
